# Supplementary material for: Evaluation and transcriptomic and metabolomic analysis of the ability of Auricularia heimuer to utilize crop straw
Source: PeerJ. 2025 Jun 11;13:e19300. doi: 10.7717/peerj.19300 (PMC12166850; doi:10.7717/peerj.19300)
Supplement: Supplemental Information 1 [file peerj-13-19300-s001.xls]

## Sheet: table 1
		D1	37.395								The 95% confidence interval for the mean
		D1	37.54			C		mean value	standard deviation	standard error	lower limit	upper limit	minimum	maximum value
		D1	37.4				3	37.445	0.0823104	0.0475219	37.2405	37.6495	37.395	37.54
		D2	36.862				3	37.0253	0.234472	0.135373	36.4429	37.6078	36.862	37.294
		D2	37.294				3	44.7727	0.216613	0.125062	44.2346	45.3108	44.528	44.94
		D2	36.92				3	45.717	0.192424	0.111096	45.239	46.195	45.495	45.836
		D3	44.94				3	40.0417	0.144507	0.0834313	39.6827	40.4006	39.898	40.187
		D3	44.528				3	47.742	0.07502	0.0433128	47.5556	47.9284	47.668	47.818
		D3	44.85
		D4	45.836		D1			D2			D3			D4			D5			D6
		D4	45.495
		D4	45.82		37.445	0.0475219	e	37.0253	0.135373	f	44.7727	0.216613	c	45.717	0.192424	b	40.0417	0.0834313	d	47.742	0.0433128	a
		D5	39.898
		D5	40.187
		D5	40.04
		D6	47.818
		D6	47.668
		D6	47.74
						N
		D1	0.774				3	0.786	0.0111355	0.0064291	0.758338	0.813662	0.774	0.796
		D1	0.796				3	0.535667	0.0125033	0.0072188	0.504607	0.566727	0.523	0.548
		D1	0.788				3	0.942333	0.0287112	0.0165764	0.871011	1.01366	0.918	0.974
		D2	0.523				3	0.664333	0.0046188	0.00267	0.65286	0.675807	0.659	0.667
		D2	0.548				3	1.63733	0.0150444	0.00868588	1.59996	1.67471	1.623	1.653
		D2	0.536				3	0.381	0.007	0.00404145	0.363611	0.398389	0.374	0.388
		D3	0.918
		D3	0.974		D1			D2			D3			D4			D5			D6
		D3	0.935
		D4	0.667		0.786	0.0064291	c	0.535667	0.0072188	e	0.942333	0.0165764	b	0.664333	0.00266667	d	1.63733	0.00868588	a	0.381	0.00404145	f
		D4	0.667
		D4	0.659
		D5	1.653
		D5	1.623
		D5	1.636
		D6	0.388
		D6	0.374
		D6	0.381
						C/N value	C	N	C/N value
						D1	37.445	0.786	47.6399
						D2	37.0253	0.535667	69.1201
						D3	44.7727	0.942333	47.5126
						D4	45.717	0.664333	68.8164
						D5	40.0417	1.63733	24.4554
						D6	47.742	0.381	125.307

## Sheet: table 2
Determination of colony growth rate（unit:mm)
Cultivation days	Name	D1			D2			D3			D4			D5			D6			D7			D8			D9			D10			D11			D12			D13			D14			CK(PDA)
Day 1		0
Day 2	r1-1	2	3	2	4	4	4	5.5	6	6	5	5.5	5.5	4.5	5	5	5	5.5	5.5	3.5	4	4	4.5	5	5	4.5	4.5	4.5	4.5	4.5	4.5	4.5	5	5	4.5	4.5	4.5	5	5	4.5	5	5.5	5.5	1	1.5	1.5
	r1-2	3	3.5	3	4	5	4.5	4.5	6	5.5	4.5	5	4.5	5	5.5	5.5	4.5	5	5	3.5	3.5	3.5	5	5.5	5	2	2	2	5	5	5	5	5	5	5	5	5	4	4.5	4	5	5	5	2	2	2
	r1-3	2	2.5	3	4	4.5	4.5	6	6	5.5	4.5	5.5	5	5.5	5.5	5	4	5	4	3	3	3	5.5	6	6	2	2.5	2.5	5	5.5	5.5	5	5	5	5	5	5	4	4.5	4	5	5	5	1	1	1
	average	2.33	3	2.67	4	4.5	4.33	5.33	6	5.67	4.67	5.33	5	5	5.33	5.17	4.5	5.17	4.83	3.33	3.5	3.42	5	5.5	5.28	2.83	3	2.94	4.83	5	4.94	4.83	5	4.94	4.83	4.83	4.83	4	4.67	4.39	5	5.17	5.11	1.33	1.5	1.44
Day 4	r1-1	10	10	10	11.5	12	11.5	18.5	20	18	16	16	16	17	17	17	19	20	20	13	13.5	13.5	16	17	17	15.5	16	15.5	17	18	18	16	17	17	16	17	17	15	15	15	16	15.5	16	12	13	12
	r1-2	7	7	7	12.5	13	13	17	18	19	16.5	16.5	16.5	18.5	18.5	19	16.5	17	16	12.5	12.5	12	17	17.5	17	14.5	15	15	15.5	16	15.5	17	17	17	17	18	17	13.5	14	13.5	15.5	15.5	15.5	14	10	13
	r1-3	7	7	7	13	14.5	14	20	20	20	17	18	18	19	19.5	19.5	16	16.5	16.5	12	12	12	17.5	17.5	17	12	12	12	13	14	13.5	17	17.5	17	18.5	18	18.5	14	14	14.5	16	15	15	10	11	10
	average	8	8	8	12.33	13.17	12.83	18.5	19.33	19	16.5	16.83	16.83	18.17	18.33	18.5	17.17	17.83	17.5	12.5	12.67	12.56	16.83	17.33	17.05	14	14.33	14.17	15.17	16	15.61	16.67	17.17	16.94	17.17	17.67	17.44	14.17	14.33	14.27	15.83	15.33	15.56	12	11.33	11.67
Day 6	r1-1	20.5	20.5	20.5	21	21	21	37	38.5	37	31	31	31	33	33	33	37	38.5	38	25	25	25	30	30.5	30.5	27.5	28	28	33	33	33	31.5	32	32	32	33	32.5	26.5	26.5	26.5	29	29	29	28	29	29
	r1-2	14.5	16	14.5	23	23	22.5	35	35	35.5	31	31	31	34	34	34	31.5	32	31.5	22	23	22	33.5	33.5	33.5	28	28	28	28	28	28	31	31	31	31.5	33.5	33	25	25	25	28.5	28.5	28.5	27	30	27.5
	r1-3	15.5	16	16.5	22	23	23	40	40	40	33	33	33	36	36	36	33	33	33	22	22.5	22.5	33	33	33	20	20.5	20.5	22	23	22.5	32	33	32.5	34	34	34	24	24	24	28	28.5	28	27	28	28
	average	16.83	17.5	17.17	22	22.33	22.17	37.33	37.83	37.5	31.67	31.67	31.67	34.33	34.33	34.33	33.83	34.5	34.17	23	23.5	23.22	32.17	32.33	32.27	25.17	25.5	25.38	27.67	28	27.83	31.5	32	31.78	32.5	33.5	33.05	25.17	25.17	25.17	28.5	28.67	28.56	27.33	29	28.17
Day 8	r1-1	31	31	31	29	29	29	54	55	54.5	44	45	44.5	49	49	49	51	51	51	35	35	35	43	43	43	37	38.5	38	49	50	50	45	46	46	49	50	50	42	42	42	42.5	43	43	45.5	46	45.5
	r1-2	28	28.5	28.5	34	34	34.5	47	48.5	48	44	44	44	51	51	51	47	47	47	31	31	31	49	49	49	41	41	41	40	40	40	45	46	45	46	48	46.5	37	37	37	42	42	42	44	47	46
	r1-3	27.5	28	27.5	32.5	33	32.5	58	58	57.5	48.5	49	48.5	54	54	54	47	47	47	31	31	31	48	50	49	29	29	29	31	33	31.5	45	46	45.5	50	50	50	34	34.5	34.5	42	43	42.5	45	46	45
	average	28.83	29.17	29	31.83	32	31.94	53	53.83	53.42	45.5	46	45.72	51.33	51.33	51.33	48.33	48.33	48.33	32.33	32.33	32.33	46.67	47.33	47	35.67	36.17	35.94	40	41	40.5	45	46	45.5	48.33	49.33	48.83	37.67	37.83	37.78	42.17	42.67	42.44	44.83	46.33	45.56
Day 10	r1-1	39	40	40	38	39	38	67	68	67.5	58	59	59	60	61	60	63	64	64	42	42	42	55	55	55	47	48	48	65	65	65	55	56	56	65	65	64.5	53	54	54	53	53	53	61	61	61
	r1-2	31	31.5	31	44	45	44.5	59	59	59	57	58	57.5	64	65	65	57	58	57	39	39	39	60	60	60	53	54	53	50	50	50	55	55	55	60	61	61	43	44	43	49	50	49	60	61	60.5
	r1-3	32	32	32	42	42	42.5	72	73	72.5	63.5	64	63.5	72	72	72	58	59	58.5	39	40	39	62	62	62	34	34	34	41	42	41.5	55	56	55	63	63	63	41	41.5	41.5	56	57	57	60	60	60
	average	34	34.5	34.28	41.33	42	41.67	66	66.67	66.33	59.5	60.33	59.94	65.33	66	65.67	59.33	60.33	59.83	40	40.33	40.11	59	59	59	44.67	45.33	45	52	52.33	52.17	55	55.67	55.33	62.67	63	62.83	45.67	46.5	46.11	52.67	53.33	53	60.33	60.67	60.5
Day 12	r1-1	51	51	51	47	47	47	77	78	77	69	70	70	73	75	74	71	73	72	47	47	47	65	65	65	56	57	57	75	76	75.5	67	69	68	79	79	79	62	63	63	64	64	64	79	79	79
	r1-2	40	41	40	55	55	55	67	67	67	67	70	67.5	79	79	79	66	68	67	45	46	45	76	76	76	62	63	62	57	58	57.5	65	66	65.5	71	72	71.5	54	56	55	60	61	60	78	79	79
	r1-3	40	41	41	50	50	50	79	79	79	75	76	76	79	79	79	72	72	72	47	48	48	72	79	75.5	41	42	41.5	49	49	49	66	66	66	76	76	76	47	51	48.5	67	70	69	75	76	75
	average	43.67	44.33	44	50.67	50.67	50.67	74.33	74.67	74.44	70.33	72	71.17	77	77.67	77.33	69.67	71	70.33	46.33	47	46.67	71	73.33	72.17	53	54	53.5	60.33	61	60.67	66	67	66.5	75.33	75.67	75.5	54.33	56.67	55.5	63.67	65	64.33	77.33	78	77.67

## Sheet: Figure 3
	Glucose standard curve
solution concentration（mg/ml）	0	0.2	0.4	0.6	0.8	1	1.2	1.4
absorbance/A	0	0.381	0.638	0.922	1.338	1.816	2.112	2.514
														transposition		N	mean value	standard deviation	standard error	The 95% confidence interval for the mean		minimum	maximum value
Determination of Enzyme Activity in Filter Paper（FPA）						publicity y=1.7978x-0.0433				publicity（Measurement value*5.56）/(0.5ml*1h)			1	1.59762						lower limit	upper limit
Name	1-1	1-2	1-3			1-1	1-2	1-3		1-1	1-2	1-3	1	1.53765		3	1.53099	0.070208	0.0405346	1.35658	1.70539	1.45768	1.59762
D1	0.104	0.101	0.097			0.143671	0.138278	0.131087		1.59762	1.53765	1.45768	1	1.45768		3	0.164897	0.0944763	0.0545459	-0.0697952	0.399589	0.0582755	0.238199
D2	0.027	0.036	0.034			0.0052406	0.0214208	0.0178252		0.0582755	0.238199	0.198216	2	0.0582755		3	1.1045	0.0756867	0.0436978	0.916483	1.29252	1.01787	1.15781
D3	0.081	0.075	0.082			0.102322	0.091535	0.10412		1.13782	1.01787	1.15781	2	0.238199		3	0.284846	0.0807948	0.0466469	0.0841407	0.485552	0.198216	0.358149
D4	0.042	0.034	0.039			0.0322076	0.0178252	0.0268142		0.358149	0.198216	0.298174	2	0.198216		3	0.837945	0.0528926	0.0305376	0.706553	0.969338	0.797962	0.89792
D5	0.065	0.064	0.069			0.073557	0.0717592	0.0807482		0.817954	0.797962	0.89792	3	1.13782		3	0.0582755	0.0528926	0.0305376	-0.0731171	0.189668	0.0182924	0.11825
D6	0.026	0.025	0.030			0.0034428	0.001645	0.010634		0.0382839	0.0182924	0.11825	3	1.01787
													3	1.15781			mean value	standard deviation	tag
													4	0.358149		D1	1.53099	0.0405346	a
													4	0.198216		D2	0.164897	0.0545459	de
													4	0.298174		D3	1.1045	0.0436978	b
													5	0.817954		D4	0.284846	0.0466469	d
													5	0.797962		D5	0.837945	0.0305376	c
													5	0.89792		D6	0.0582755	0.0305376	e
													6	0.0382839	D1	3	1.53099	0.070208	0.0405346	1.35658	1.70539	1.45768	1.59762
													6	0.0182924	D3	3	1.1045	0.0756867	0.0436978	0.916483	1.29252	1.01787	1.15781
													6	0.11825	D6	3	0.0582755	0.0528926	0.0305376	-0.0731171	0.189668	0.0182924	0.11825
Exoglucanase activity（EXGA）														transposition		N	mean value	standard deviation	standard error	The 95% confidence interval for the mean		minimum	maximum value
Determination of Exoglucanase Activity（Cx）													1	1.15611		3	1.16944	0.100622	0.0580941	0.91948	1.4194	1.07614	1.27606
Name	1-1	1-2	1-3			publicity y=1.7978x-0.0433				publicity（Measurement value*5.56）/(0.5ml*1h)			1	1.07614		3	0.396432	0.0692527	0.0399831	0.224399	0.568466	0.356449	0.476399
D1	0.053	0.051	0.056			0.0519834	0.0483878	0.0573768		1.15611	1.07614	1.27606	1	1.27606		3	1.00951	0.0461685	0.0266554	0.894817	1.1242	0.956195	1.03616
D2	0.036	0.033	0.033			0.0214208	0.0160274	0.0160274		0.476399	0.356449	0.356449	2	0.476399		3	0.556365	0.105785	0.0610752	0.29358	0.81915	0.476399	0.676314
D3	0.048	0.050	0.050			0.0429944	0.04659	0.04659		0.956195	1.03616	1.03616	2	0.356449		3	0.662986	0.0832314	0.0480537	0.456228	0.869745	0.596348	0.75628
D4	0.036	0.041	0.037			0.0214208	0.0304098	0.0232186		0.476399	0.676314	0.516382	2	0.356449		3	1.16944	0.115421	0.0666385	0.882716	1.45616	1.03616	1.23608
D5	0.043	0.039	0.040			0.0340054	0.0268142	0.028612		0.75628	0.596348	0.636331	3	0.956195
D6	0.050	0.055	0.055			0.04659	0.055579	0.055579		1.03616	1.23608	1.23608	3	1.03616			mean value	standard error	tag
													3	1.03616		D1	1.16944	0.0580941	a
													4	0.476399		D2	0.396432	0.0399831	c
													4	0.676314		D3	1.00951	0.0266554	a
													4	0.516382		D4	0.556365	0.0610752	b
													5	0.75628		D5	0.662986	0.0480537	b
													5	0.596348		D6	1.16944	0.0666385	a
													5	0.636331
													6	1.03616
													6	1.23608
Endoglucanase activity（ENGA）													6	1.23608
Determination of Endoglucanase Activity（C1）
Name	1-1	1-2	1-3			ublicity y=1.7978x-0.0433				ublicity（Measurement value*5.56）/(0.5ml*1h)				transposition		N	mean value	standard deviation	standard error	The 95% confidence interval for the mean		minimum	maximum value
D1	0.187	0.191	0.192			0.292889	0.30008	0.301878		6.51384	6.67377	6.71376	1	6.51384		3	6.63379	0.105785	0.0610752	6.37101	6.89658	6.51384	6.71376
D2	0.051	0.046	0.048			0.0483878	0.0393988	0.0429944		1.07614	0.876229	0.956195	1	6.67377		3	0.969523	0.100622	0.0580941	0.719565	1.21948	0.876229	1.07614
D3	0.13	0.134	0.13			0.190414	0.197605	0.190414		4.23481	4.39474	4.23481	1	6.71376		3	4.28812	0.092337	0.0533108	4.05874	4.5175	4.23481	4.39474
D4	0.109	0.112	0.111			0.15266	0.158054	0.156256		3.39516	3.51511	3.47513	2	1.07614		3	3.4618	0.0610752	0.0352618	3.31008	3.61352	3.39516	3.51511
D5	0.089	0.087	0.09			0.116704	0.113109	0.118502		2.5955	2.51554	2.63548	2	0.876229		3	2.58217	0.0610752	0.0352618	2.43045	2.73389	2.51554	2.63548
D6	0.06	0.058	0.063			0.064568	0.0609724	0.0699614		1.43599	1.35603	1.55594	2	0.956195		3	1.44932	0.100622	0.0580941	1.19936	1.69928	1.35603	1.55594
													3	4.23481
													3	4.39474			mean value	standard error	tag
													3	4.23481		D1	6.63379	0.0610752	a
													4	3.39516		D2	0.969523	0.0580941	f
													4	3.51511		D3	4.28812	0.0533108	b
													4	3.47513		D4	3.4618	0.0352618	c
													5	2.5955		D5	2.58217	0.0352618	e
													5	2.51554		D6	1.44932	0.0580941	d
													5	2.63548
													6	1.43599
													6	1.35603
													6	1.55594
β-Glucosidase activity（β-GA）
β-Glucosidase activity（β-GA）
Name	1-1	1-2	1-3			ublicity y=1.7978x-0.0433				ublicity（Measurement value*5.56）/(0.5ml*1h)				transposition		N	mean value	standard deviation	standard error	The 95% confidence interval for the mean		minimum	maximum value
D1	0.111	0.101	0.109			0.156256	0.138278	0.15266		3.47513	3.0753	3.39516	1	3.47513		3	3.3152	0.211571	0.12215	2.78963	3.84077	3.0753	3.47513
D2	0.045	0.041	0.048			0.037601	0.0304098	0.0429944		0.836246	0.676314	0.956195	1	3.0753		3	0.822919	0.140416	0.0810692	0.474106	1.17173	0.676314	0.956195
D3	0.106	0.104	0.1			0.147267	0.143671	0.13648		3.27521	3.19525	3.03532	1	3.39516		3	3.16859	0.12215	0.0705235	2.86515	3.47203	3.03532	3.27521
D4	0.069	0.069	0.065			0.0807482	0.0807482	0.073557		1.79584	1.79584	1.63591	2	0.836246		3	1.74253	0.092337	0.0533108	1.51315	1.97191	1.63591	1.79584
D5	0.039	0.036	0.041			0.0268142	0.0214208	0.0304098		0.596348	0.476399	0.676314	2	0.676314		3	0.58302	0.100622	0.0580941	0.333062	0.832979	0.476399	0.676314
D6	0.072	0.061	0.064			0.0861416	0.0663658	0.0717592		1.91579	1.47598	1.59592	2	0.956195		3	1.66256	0.227353	0.131263	1.09779	2.22734	1.47598	1.91579
													3	3.27521
													3	3.19525			mean value	standard error	tag
													3	3.03532		D1	3.3152	0.12215	a
													4	1.79584		D2	0.822919	0.0810692	c
													4	1.79584		D3	3.16859	0.0705235	a
													4	1.63591		D4	1.74253	0.0533108	b
													5	0.596348		D5	0.58302	0.0580941	c
													5	0.476399		D6	1.66256	0.131263	b
													5	0.676314
													6	1.91579
													6	1.47598
													6	1.59592

## Sheet: Figure 4
β-1, 4-endoxylanase				raw data	1.4181x+0.0173	U/ml				Xylanase standard curve
			D1	0.056	0.0967136	77.2935			solution concentration（mg/ml）	0	0.2	0.4	0.6	0.8	1	1.2	1.4
				0.055	0.0952955	76.1602			absorbance/A	0	0.2	0.562	1.03	1.284	1.35	1.686	1.968		0.1
				0.053	0.0924593	73.8935													0.281
			D2	0.007	0.0272267	21.7596													0.515
				0.009	0.0300629	24.0263													0.642
				0.008	0.0286448	22.8929													0.675
			D3	0.008	0.0286448	22.8929													0.843
				0.009	0.0300629	24.0263													0.984
				0.008	0.0286448	22.8929
			D4	0.017	0.0414077	33.093
				0.015	0.0385715	30.8263
				0.016	0.0399896	31.9597
			D5	0.055	0.0952955	76.1602
				0.056	0.0967136	77.2935
				0.056	0.0967136	77.2935
			D6	0.019	0.0442439	35.3597
				0.017	0.0414077	33.093
				0.017	0.0414077	33.093
	N	mean value	standard deviation	standard error	The 95% confidence interval for the mean		minimum	maximum value
					lower limit	upper limit
D1	3	75.7824	1.73121	0.999517	71.4818	80.083	73.8935	77.2935
D2	3	22.8929	1.13335	0.654337	20.0775	25.7083	21.7596	24.0263
D3	3	23.2707	0.654337	0.377782	21.6452	24.8962	22.8929	24.0263
D4	3	31.9597	1.13335	0.654337	29.1443	34.7751	30.8263	33.093
D5	3	76.9157	0.654337	0.377782	75.2903	78.5412	76.1602	77.2935
D6	3	33.8486	1.30867	0.755564	30.5977	37.0995	33.093	35.3597
	D1	75.7824	0.999517	a
	D2	22.8929	0.654337	c
	D3	23.2707	0.377782	c
	D4	31.9597	0.654337	b
	D5	76.9157	0.377782	a
	D6	33.8486	0.755564	b
Lac
	Determination of Laccase Activity(Lac)
D1	时间	30 s	60s	90s	120s	150s	180s
	1.15	1.709	1.712	1.714	1.715	1.717	1.719
	1.17	1.762	1.765	1.767	1.77	1.772	1.774
	1.19	1.894	1.897	1.899	1.901	1.904	1.906
	1.21	1.919	1.918	1.919	1.92	1.921	1.922
	1.25	1.95	1.952	1.954	1.955	1.956	1.958
D2	Determination of Laccase Activity(Lac)
	时间	30 s	60s	90s	120s	150s	180s
	1.15	1.123	1.138	1.149	1.158	1.165	1.171
	1.17	1.145	1.16	1.17	1.177	1.183	1.187
	1.19	1.331	1.336	1.337	1.337	1.336	1.334
	1.21	1.279	1.303	1.308	1.306	1.306	1.304
	1.25	1.282	1.293	1.299	1.303	1.305	1.306
D3	Determination of Laccase Activity(Lac)
	时间	30 s	60s	90s	120s	150s	180s
	1.15	1.842	1.842	1.842	1.843	1.843	1.843
	1.17	1.872	1.872	1.871	1.871	1.871	1.87
	1.19	1.897	1.9	1.903	1.905	1.906	1.908
	1.21	1.988	1.991	1.995	1.998	2.001	2.003
	1.25	2.345	2.354	2.361	2.367	2.371	2.375
D4	Determination of Laccase Activity(Lac)
	时间	30 s	60s	90s	120s	150s	180s
	1.15	0.729	0.744	0.756	0.768	0.778	0.787
	1.17	1.345	1.364	1.378	1.389	1.397	1.404
	1.19	1.239	1.258	1.271	1.28	1.287	1.291
	1.21	1.181	1.207	1.227	1.244	1.257	1.268
	1.25	1.054	1.081	1.105	1.125	1.143	1.158
D5	Determination of Laccase Activity(Lac)
	时间	30 s	60s	90s	120s	150s	180s
	1.15	1.183	1.184	1.185	1.186	1.186	1.187
	1.17	1.401	1.416	1.428	1.439	1.448	1.455
	1.19	1.459	1.471	1.482	1.489	1.497	1.505
	1.21	1.28	1.292	1.303	1.313	1.323	1.332
	1.25	1.27	1.273	1.278	1.283	1.292	1.301
D6	Determination of Laccase Activity(Lac)
	时间	30 s	60s	90s	120s	150s	180s
	1.15	1.681	1.71	1.736	1.758	1.778	1.795
	1.17	1.733	1.76	1.783	1.802	1.819	1.833
	1.19	1.753	1.784	1.792	1.809	1.828	1.848
	1.21	1.757	1.794	1.798	1.818	1.835	1.851
	1.25	1.755	1.799	1.806	1.823	1.851	1.86
Lip
	Determination of peroxidase activity(LiP)
D1	时间	30 s	60s	90s	120s	150s	180s
	1.15	2.307	2.509	2.678	2.697	2.712	2.733
	1.17	2.748	2.723	2.712	2.705	2.701	2.697
	1.19	2.779	2.757	2.735	2.714	2.712	2.709
	1.21	2.679	2.645	2.616	2.643	2.639	2.6
	1.25	2.694	2.677	2.666	2.601	2.574	2.566
	Determination of peroxidase activity(LiP)
D2	时间	30 s	60s	90s	120s	150s	180s
	1.15	2.145	2.16	2.17	2.177	2.183	2.187
	1.17	2.607	2.584	2.575	2.571	2.568	2.566
	1.19	2.631	2.636	2.617	2.537	2.533	2.534
	1.21	2.579	2.623	2.648	2.676	2.696	2.724
	1.25	2.292	2.493	2.521	2.713	2.8965	3.276
	Determination of peroxidase activity(LiP)
D3	时间	30 s	60s	90s	120s	150s	180s
	1.15	2.572	2.572	2.571	2.571	2.571	2.57
	1.17	2.642	2.609	2.597	2.599	2.598	2.592
	1.19	2.797	2.7	2.703	2.705	2.706	2.708
	1.21	2.988	3.121	3.265	2.345	2.425	2.495
	1.25	2.755	2.864	2.901	2.998	3.121	2.209
	Determination of peroxidase activity(LiP)
D4	时间	30 s	60s	90s	120s	150s	180s
	1.15	2.321	2.276	2.255	2.218	2.158	2.1323
	1.17	2.326	2.3	2.289	2.284	2.281	2.279
	1.19	2.289	2.298	2.313	2.337	2.498	2.337
	1.21	2.345	2.399	2.443	2.488	2.516	2.589
	1.25	2.366	2.413	2.458	2.546	2.667	2.687
	Determination of peroxidase activity(LiP)
D5	时间	30 s	60s	90s	120s	150s	180s
	1.15	2.339	2.314	2.297	2.289	2.281	2.261
	1.17	2.339	2.324	2.317	2.312	2.307	2.307
	1.19	2.369	2.361	2.341	2.333	2.321	2.311
	1.21	2.367	2.317	2.303	2.293	2.285	2.255
	1.25	2.311	2.302	2.294	2.274	2.256	2.233
	Determination of peroxidase activity(LiP)
D6	时间	30 s	60s	90s	120s	150s	180s
	1.15	2.278	2.263	2.243	2.218	2.201	2.193
	1.17	2.432	2.367	2.321	2.3	2.295	2.265
	1.19	2.598	2.555	2.498	2.404	2.313	2.211
	1.21	2.624	2.603	2.594	2.588	2.587	2.582
	1.25	2.741	2.721	2.612	2.604	2.597	2.591
MnP
Determination of Manganese Peroxidase Activity(MnP)
	Determination of Manganese Peroxidase Activity(MnP)
D1	时间	30 s	60s	90s	120s	150s	180s
	1.15	0.316	0.318	0.326	0.336	0.345	0.35
	1.17	0.295	0.304	0.312	0.32	0.328	0.336
	1.19	0.457	0.48	0.502	0.524	0.545	0.566
	1.21	0.417	0.438	0.455	0.475	0.494	0.517
	1.25	0.401	0.419	0.428	0.442	0.456	0.473
	Determination of Manganese Peroxidase Activity(MnP)
D2	时间	30 s	60s	90s	120s	150s	180s
	1.15	0.618	0.678	0.717	0.768	0.819	0.863
	1.17	0.826	0.894	0.96	1.025	1.089	1.152
	1.19	0.956	1.041	1.121	1.2	1.278	1.352
	1.21	1.385	1.507	1.623	1.734	1.842	1.949
	1.25	1.497	1.628	1.756	1.876	1.995	2.108
	Determination of Manganese Peroxidase Activity(MnP)
D3	时间	30 s	60s	90s	120s	150s	180s
	1.15	0.208	0.211	0.213	0.215	0.217	0.22
	1.17	0.305	0.316	0.324	0.333	0.342	0.351
	1.19	0.371	0.383	0.386	0.398	0.415	0.429
	1.21	0.368	0.384	0.403	0.421	0.435	0.453
	1.25	0.587	0.628	0.668	0.708	0.747	0.785
	Determination of Manganese Peroxidase Activity(MnP)
D4	时间	30 s	60s	90s	120s	150s	180s
	1.15	0.298	0.315	0.333	0.349	0.364	0.383
	1.17	0.49	0.525	0.55	0.584	0.616	0.651
	1.19	0.572	0.616	0.659	1.7	0.741	0.782
	1.21	0.299	0.318	0.327	0.349	0.365	0.381
	1.25	0.24	0.258	0.275	0.293	0.31	0.327
	Determination of Manganese Peroxidase Activity(MnP)
D5	时间	30 s	60s	90s	120s	150s	180s
	1.15	0.222	0.23	0.238	0.246	0.254	0.262
	1.17	0.427	0.455	0.482	0.51	0.536	0.562
	1.19	0.512	0.55	0.585	0.619	0.653	0.685
	1.21	0.381	0.407	0.43	0.453	0.478	0.502
	1.25	0.322	0.345	0.366	0.387	0.409	0.43
	Determination of Manganese Peroxidase Activity(MnP)
D6	时间	30 s	60s	90s	120s	150s	180s
	1.15	0.73	0.776	0.823	0.873	0.922	0.97
	1.17	0.765	0.822	0.881	0.937	0.992	1.048
	1.19	0.691	0.734	0.786	0.832	0.88	0.925
	1.21	0.659	0.706	0.757	0.804	0.85	0.898
	1.25	0.522	0.567	0.612	0.656	0.699	0.742

## Sheet: Figure 5
Indicators/Dimensions	D1	D2	D3	D4	D5	D6
Mycelial growth rate	44 ± 0.33 d	50.67 ± 0 c	76.88 ± 0.39 a	71.17 ± 0.84 b	77.33 ± 0.34 a	76.63 ± 0.58 a
C(%)	37.45 ± 0.08 e	37.03 ± 0.23 f	44.77 ± 0.22 c	45.72 ± 0.19 b	40.04 ± 0.14 d	47.74 ± 0.08 a
N(%)	0.79 ± 0.01 c	0.54 ± 0.01 e	0.94 ± 0.03 b	0.66 ± 0 d	1.64 ± 0.02 a	0.38 ± 0.01 f
Cellulose	45.87 ± 2.23 ab	43.99 ± 0.3 bc	47.56 ± 0.66 a	44.63 ± 2.13 bc	42.77 ± 1.07 c	40.02 ± 0.75 d
Hemicellulose	14.98 ± 1.25 d	25.43 ± 1.25 b	23.77 ± 1.5 b	35.01 ± 1.95 a	24.88 ± 1.15 b	19.89 ± 1.39 c
Lignin	14.83 ± 1.38 c	15.63 ± 0.62 c	19.56 ± 1.14 b	20.31 ± 1.43 b	14.36 ± 0.96 c	37.69 ± 0.86 a
FPA	1.53 ± 0.07 a	0.16 ± 0.09 de	1.1 ± 0.08 b	0.28 ± 0.08 d	0.84 ± 0.05 c	0.06 ± 0.05 e
C1	6.63 ± 0.11 a	0.97 ± 0.1 f	4.29 ± 0.09 b	3.46 ± 0.06 c	2.58 ± 0.06 e	1.45 ± 0.1 d
CX	1.17 ± 0.1 a	0.4 ± 0.07 c	1.01 ± 0.05 a	0.56 ± 0.11 b	0.66 ± 0.08 b	1.17 ± 0.12 a
β-G	3.32 ± 0.21 a	0.82 ± 0.14 c	3.17 ± 0.12 a	1.74 ± 0.09 b	0.58 ± 0.1 c	1.66 ± 0.23 b
Xylanase	75.78 ± 1.73 a	22.89 ± 1.13 c	23.27 ± 0.65 c	31.96 ± 1.13 b	76.92 ± 0.65 a	33.85 ± 1.31 b
LiP	729.66 ± 1.72 a	693.14 ± 3.54 c	704.17 ± 4.17 b	697.09 ± 1.29 c	703.67 ± 2.83 b	697.94 ± 1.97 c
MnP	322.13 ± 3.4 e	546.15 ± 3.79 d	641.71 ± 5.58 b	610.17 ± 5.07 c	635.66 ± 4.68 b	666.35 ± 3.52 a
Lac	54.18 ± 1.35 b	35.91 ± 2.54 d	56.71 ± 2.13 b	48.74 ± 1.25 c	36.01 ± 1.87 d	63.89 ± 2.53 a

## Sheet: DEG-stat
Control	Treat	Up Number	Down Number	DEG Number
D1	D3	2689	2460	5149
D1	D6	1296	1444	2740
D6	D3	1559	1374	2933

## Sheet: Expression level analysis
Offline data statistics
Sample	Reads No.	Bases (bp)	Q30 (bp)	N (%)	Q20 (%)	Q30 (%)
D1_1	47444580	7164131580	6897509098	0.005	98.74	96.28
D1_2	48018560	7250802560	7012585499	0.005093	98.91	96.71
D1_3	38686418	5841649118	5628016433	0.004761	98.78	96.34
D3_1	42208014	6373410114	6143523527	0.004756	98.78	96.39
D3_2	53398250	8063135750	7765691955	0.004757	98.75	96.31
D3_3	45579100	6882444100	6626310426	0.00473	98.74	96.28
D6_1	43406120	6554324120	6322997978	0.004728	98.82	96.47
D6_2	53752820	8116675820	7816010698	0.004776	98.74	96.3
D6_3	60946364	9202900964	8896117282	0.004879	98.89	96.67
注：Sample：Sample Name；
Reads No.：Reads total；
Bases(bp)：Total number of bases；
Q30 (bp)：The total number of bases with an accuracy of over 99.9% in base recognition；
N(%)：Percentage of fuzzy bases；
Q20(%)：The percentage of bases with an accuracy of over 99% in base recognition；
Q30(%)：The percentage of bases with an accuracy of over 99.9% in base recognition。

## Sheet: Overall statistics of sequences
Overall statistics of sequences
	Transcript	Unigene
Total Length (bp)	212178616	31375312
Sequence Number	79320	16219
Max. Length (bp)	25036	25036
Mean Length (bp)	2674.97	1934.48
N50 (bp)	3893	3359
N50 Sequence No.	17793	2854
N90 (bp)	1427	869
N90 Sequence No.	52059	9517
GC%	58.64	58.22

## Sheet: S4 D1-vs-D3KEGG-enrichment
PathwayID	Pathway	Level1	Level2	Up_number	Down_number	DEG_number	total_number	Pvalue	FDR	Up_gene	Down_gene	URL（KEGG的通路图）
ko03010	Ribosome	Genetic Information Processing	Translation	1	64	65	89	2.58775e-14	2.8724e-12	TRINITY_DN2024_c0_g1	TRINITY_DN4594_c0_g1,TRINITY_DN1691_c1_g1,TRINITY_DN7913_c0_g1,TRINITY_DN3101_c0_g1,TRINITY_DN1565_c3_g1,TRINITY_DN539_c1_g1,TRINITY_DN4787_c0_g1,TRINITY_DN4468_c0_g1,TRINITY_DN9678_c0_g1,TRINITY_DN2385_c0_g1,TRINITY_DN1477_c1_g1,TRINITY_DN3279_c0_g1,TRINITY_DN2236_c0_g1,TRINITY_DN1479_c0_g1,TRINITY_DN5176_c0_g1,TRINITY_DN5125_c0_g1,TRINITY_DN536_c3_g1,TRINITY_DN3976_c0_g1,TRINITY_DN3336_c0_g1,TR…	http://www.kegg.jp/kegg-bin/show_pathway?map=map03010&multi_query=K02985+%23FFFFFF,green%0d%0aK02958+%23FFFFFF,green%0d%0aK02966+%23FFFFFF,green%0d%0aK02882+%23FFFFFF,green%0d%0aK02871+%23FFFFFF,green%0d%0aK02940+%23FFFFFF,green%0d%0aK02901+%23FFFFFF,green%0d%0aK02971+%23FFFFFF,green%0d%0aK02938+%23FFFFFF,green%0d%0aK02913+%23FFFFFF,green%0d%0aK02889+%23FFFFFF,green%0d%0aK02973+%23FFFFFF,green%0d…
ko04141	Protein processing in endoplasmic reticulum	Genetic Information Processing	Folding, sorting and degradation	25	34	59	115	7.96726e-05	0.00442183	TRINITY_DN5901_c0_g2,TRINITY_DN5824_c0_g1,TRINITY_DN5901_c0_g1,TRINITY_DN8732_c0_g1,TRINITY_DN2914_c0_g4,TRINITY_DN7433_c0_g2,TRINITY_DN281_c0_g1,TRINITY_DN5402_c0_g1,TRINITY_DN4483_c0_g1,TRINITY_DN774_c0_g1,TRINITY_DN89_c0_g1,TRINITY_DN5595_c0_g1,TRINITY_DN7139_c0_g1,TRINITY_DN351_c1_g2,TRINITY_DN1641_c0_g1,TRINITY_DN6605_c2_g1,TRINITY_DN2300_c3_g1,TRINITY_DN216_c3_g2,TRINITY_DN9702_c0_g1,TRINIT…	TRINITY_DN1829_c5_g1,TRINITY_DN9672_c0_g1,TRINITY_DN519_c4_g1,TRINITY_DN1719_c0_g1,TRINITY_DN1947_c0_g1,TRINITY_DN3476_c0_g1,TRINITY_DN6419_c0_g1,TRINITY_DN933_c1_g1,TRINITY_DN320_c3_g1,TRINITY_DN536_c12_g1,TRINITY_DN466_c1_g1,TRINITY_DN3488_c0_g1,TRINITY_DN2000_c0_g1,TRINITY_DN4088_c0_g1,TRINITY_DN1889_c0_g1,TRINITY_DN1437_c0_g1,TRINITY_DN4263_c1_g2,TRINITY_DN1770_c2_g1,TRINITY_DN1081_c1_g1,TRIN…	http://www.kegg.jp/kegg-bin/show_pathway?map=map04141&multi_query=K09518+%23FFFFFF,green%0d%0aK09486+%23FFFFFF,red%0d%0aK07151+%23FFFFFF,green%0d%0aK01230+%23FFFFFF,green%0d%0aK09481+%23FFFFFF,green%0d%0aK03283+%23FFFFFF,purple%0d%0aK10601+%23FFFFFF,green%0d%0aK13996+%23FFFFFF,red%0d%0aK10578+%23FFFFFF,green%0d%0aK03347+%23FFFFFF,red%0d%0aK14026+%23FFFFFF,green%0d%0aK12670+%23FFFFFF,green%0d%0aK1…
ko00190	Oxidative phosphorylation	Metabolism	Energy metabolism	4	39	43	81	0.000290394	0.0107446	TRINITY_DN1180_c1_g1,TRINITY_DN5650_c0_g1,TRINITY_DN4345_c0_g1,TRINITY_DN8931_c0_g1	TRINITY_DN3408_c0_g1,TRINITY_DN202_c3_g1,TRINITY_DN2582_c0_g1,TRINITY_DN1110_c0_g1,TRINITY_DN70_c4_g1,TRINITY_DN126_c2_g3,TRINITY_DN571_c2_g1,TRINITY_DN617_c2_g1,TRINITY_DN643_c1_g2,TRINITY_DN723_c9_g1,TRINITY_DN98_c0_g1,TRINITY_DN4_c14_g1,TRINITY_DN3203_c0_g1,TRINITY_DN3377_c0_g1,TRINITY_DN14918_c0_g1,TRINITY_DN2677_c1_g1,TRINITY_DN258_c2_g2,TRINITY_DN3905_c0_g1,TRINITY_DN339_c1_g1,TRINITY_DN341…	http://www.kegg.jp/kegg-bin/show_pathway?map=map00190&multi_query=K02127+%23FFFFFF,green%0d%0aK02257+%23FFFFFF,green%0d%0aK03884+%23FFFFFF,green%0d%0aK00234+%23FFFFFF,green%0d%0aK00419+%23FFFFFF,green%0d%0aK02138+%23FFFFFF,green%0d%0aK00237+%23FFFFFF,green%0d%0aK03939+%23FFFFFF,green%0d%0aK03883+%23FFFFFF,green%0d%0aK02260+%23FFFFFF,green%0d%0aK03936+%23FFFFFF,green%0d%0aK02132+%23FFFFFF,green%0d…
ko00480	Glutathione metabolism	Metabolism	Metabolism of other amino acids	4	16	20	35	0.00424191	0.109576	TRINITY_DN9556_c0_g1,TRINITY_DN1351_c0_g1,TRINITY_DN6_c3_g1,TRINITY_DN7287_c0_g1	TRINITY_DN116_c1_g1,TRINITY_DN488_c0_g2,TRINITY_DN1097_c0_g1,TRINITY_DN3043_c0_g1,TRINITY_DN1951_c0_g1,TRINITY_DN3156_c0_g1,TRINITY_DN1327_c1_g1,TRINITY_DN760_c1_g2,TRINITY_DN2899_c0_g1,TRINITY_DN2953_c2_g1,TRINITY_DN9346_c0_g1,TRINITY_DN2397_c1_g2,TRINITY_DN3940_c0_g1,TRINITY_DN4478_c0_g1,TRINITY_DN449_c2_g1,TRINITY_DN1302_c0_g1	http://www.kegg.jp/kegg-bin/show_pathway?map=map00480&multi_query=K01469+%23FFFFFF,green%0d%0aK00033+%23FFFFFF,green%0d%0aK00432+%23FFFFFF,green%0d%0aK00036+%23FFFFFF,green%0d%0aK04097+%23FFFFFF,purple%0d%0aK00799+%23FFFFFF,purple%0d%0aK07160+%23FFFFFF,red%0d%0aK00383+%23FFFFFF,green%0d%0aK10808+%23FFFFFF,green%0d%0aK00681+%23FFFFFF,green%0d%0aK07232+%23FFFFFF,red%0d%0a
ko00920	Sulfur metabolism	Metabolism	Energy metabolism	3	8	11	16	0.00493587	0.109576	TRINITY_DN4882_c0_g1,TRINITY_DN6483_c0_g1,TRINITY_DN5345_c0_g1	TRINITY_DN1563_c1_g1,TRINITY_DN5816_c0_g1,TRINITY_DN2167_c0_g1,TRINITY_DN2406_c1_g2,TRINITY_DN2726_c0_g2,TRINITY_DN27_c5_g1,TRINITY_DN2668_c0_g1,TRINITY_DN2418_c0_g3	http://www.kegg.jp/kegg-bin/show_pathway?map=map00920&multi_query=K01738+%23FFFFFF,purple%0d%0aK01739+%23FFFFFF,green%0d%0aK00390+%23FFFFFF,green%0d%0aK00958+%23FFFFFF,green%0d%0aK00381+%23FFFFFF,green%0d%0aK00641+%23FFFFFF,red%0d%0aK01011+%23FFFFFF,red%0d%0aK17069+%23FFFFFF,green%0d%0a
ko00590	Arachidonic acid metabolism	Metabolism	Lipid metabolism	4	5	9	15	0.0359807	0.55325	TRINITY_DN43_c1_g1,TRINITY_DN6_c3_g1,TRINITY_DN1559_c0_g1,TRINITY_DN7299_c0_g1	TRINITY_DN449_c2_g1,TRINITY_DN2953_c2_g1,TRINITY_DN2397_c1_g2,TRINITY_DN3654_c0_g1,TRINITY_DN2594_c0_g1	http://www.kegg.jp/kegg-bin/show_pathway?map=map00590&multi_query=K00079+%23FFFFFF,green%0d%0aK00432+%23FFFFFF,green%0d%0aK08726+%23FFFFFF,purple%0d%0aK14621+%23FFFFFF,red%0d%0aK04097+%23FFFFFF,purple%0d%0a
ko00010	Glycolysis / Gluconeogenesis	Metabolism	Carbohydrate metabolism	2	18	20	42	0.0482508	0.55325	TRINITY_DN6565_c0_g1,TRINITY_DN640_c0_g1	TRINITY_DN777_c0_g1,TRINITY_DN872_c3_g2,TRINITY_DN3933_c0_g1,TRINITY_DN1579_c0_g1,TRINITY_DN729_c10_g1,TRINITY_DN498_c7_g1,TRINITY_DN1219_c1_g1,TRINITY_DN1665_c0_g1,TRINITY_DN15_c9_g1,TRINITY_DN2257_c0_g1,TRINITY_DN693_c2_g1,TRINITY_DN155_c3_g1,TRINITY_DN973_c2_g1,TRINITY_DN101_c5_g1,TRINITY_DN2233_c1_g1,TRINITY_DN1348_c0_g1,TRINITY_DN4442_c0_g1,TRINITY_DN1147_c1_g1	http://www.kegg.jp/kegg-bin/show_pathway?map=map00010&multi_query=K00873+%23FFFFFF,green%0d%0aK01568+%23FFFFFF,red%0d%0aK01810+%23FFFFFF,green%0d%0aK00844+%23FFFFFF,green%0d%0aK13953+%23FFFFFF,green%0d%0aK01689+%23FFFFFF,green%0d%0aK01835+%23FFFFFF,green%0d%0aK00128+%23FFFFFF,green%0d%0aK15633+%23FFFFFF,green%0d%0aK01803+%23FFFFFF,green%0d%0aK00134+%23FFFFFF,green%0d%0aK00382+%23FFFFFF,green%0d%0…
ko00430	Taurine and hypotaurine metabolism	Metabolism	Metabolism of other amino acids	0	4	4	5	0.0495542	0.55325	-	TRINITY_DN2078_c0_g1,TRINITY_DN173_c0_g1,TRINITY_DN3156_c0_g1,TRINITY_DN462_c0_g1	http://www.kegg.jp/kegg-bin/show_pathway?map=map00430&multi_query=K01580+%23FFFFFF,green%0d%0aK00681+%23FFFFFF,green%0d%0aK15371+%23FFFFFF,green%0d%0aK00925+%23FFFFFF,green%0d%0a
ko00680	Methane metabolism	Metabolism	Energy metabolism	3	10	13	25	0.0498423	0.55325	TRINITY_DN640_c0_g1,TRINITY_DN3006_c0_g1,TRINITY_DN5187_c0_g1	TRINITY_DN2249_c0_g1,TRINITY_DN1579_c0_g1,TRINITY_DN3735_c0_g1,TRINITY_DN2042_c1_g1,TRINITY_DN2257_c0_g1,TRINITY_DN15_c9_g1,TRINITY_DN2739_c0_g1,TRINITY_DN1348_c0_g1,TRINITY_DN101_c5_g1,TRINITY_DN173_c0_g1	http://www.kegg.jp/kegg-bin/show_pathway?map=map00680&multi_query=K03841+%23FFFFFF,green%0d%0aK17066+%23FFFFFF,red%0d%0aK00122+%23FFFFFF,green%0d%0aK01689+%23FFFFFF,green%0d%0aK00600+%23FFFFFF,green%0d%0aK00863+%23FFFFFF,green%0d%0aK15634+%23FFFFFF,purple%0d%0aK01624+%23FFFFFF,green%0d%0aK00058+%23FFFFFF,green%0d%0aK15633+%23FFFFFF,green%0d%0aK00925+%23FFFFFF,green%0d%0a
ko00051	Fructose and mannose metabolism	Metabolism	Carbohydrate metabolism	2	11	13	25	0.0498423	0.55325	TRINITY_DN234_c0_g1,TRINITY_DN6546_c0_g1	TRINITY_DN1579_c0_g1,TRINITY_DN5457_c0_g2,TRINITY_DN2042_c1_g1,TRINITY_DN7422_c0_g1,TRINITY_DN777_c0_g1,TRINITY_DN101_c5_g1,TRINITY_DN1332_c1_g2,TRINITY_DN1876_c0_g1,TRINITY_DN1332_c1_g1,TRINITY_DN1455_c0_g1,TRINITY_DN973_c2_g1	http://www.kegg.jp/kegg-bin/show_pathway?map=map00051&multi_query=K00008+%23FFFFFF,green%0d%0aK03841+%23FFFFFF,green%0d%0aK02377+%23FFFFFF,green%0d%0aK01711+%23FFFFFF,green%0d%0aK17497+%23FFFFFF,red%0d%0aK19355+%23FFFFFF,purple%0d%0aK18337+%23FFFFFF,green%0d%0aK01624+%23FFFFFF,green%0d%0aK19030+%23FFFFFF,green%0d%0aK00863+%23FFFFFF,green%0d%0aK01803+%23FFFFFF,green%0d%0aK00844+%23FFFFFF,green%0d%…
ko00350	Tyrosine metabolism	Metabolism	Amino acid metabolism	6	12	18	39	0.0803761	0.782459	TRINITY_DN9476_c0_g1,TRINITY_DN4550_c0_g1,TRINITY_DN5517_c0_g1,TRINITY_DN10339_c0_g1,TRINITY_DN978_c0_g1,TRINITY_DN4153_c0_g1	TRINITY_DN2668_c2_g1,TRINITY_DN14791_c0_g1,TRINITY_DN2002_c1_g1,TRINITY_DN5764_c0_g1,TRINITY_DN3081_c0_g1,TRINITY_DN2343_c0_g1,TRINITY_DN4442_c0_g1,TRINITY_DN872_c3_g2,TRINITY_DN1031_c0_g1,TRINITY_DN818_c1_g1,TRINITY_DN1188_c0_g1,TRINITY_DN3933_c0_g1	http://www.kegg.jp/kegg-bin/show_pathway?map=map00350&multi_query=K13953+%23FFFFFF,green%0d%0aK00451+%23FFFFFF,red%0d%0aK02510+%23FFFFFF,green%0d%0aK00505+%23FFFFFF,purple%0d%0aK00838+%23FFFFFF,green%0d%0aK00276+%23FFFFFF,purple%0d%0aK00135+%23FFFFFF,red%0d%0aK14454+%23FFFFFF,red%0d%0aK07253+%23FFFFFF,green%0d%0a
ko03030	DNA replication	Genetic Information Processing	Replication and repair	15	4	19	42	0.0891841	0.782459	TRINITY_DN2198_c0_g1,TRINITY_DN793_c1_g1,TRINITY_DN1197_c0_g1,TRINITY_DN9663_c0_g1,TRINITY_DN2239_c1_g1,TRINITY_DN2903_c0_g1,TRINITY_DN3712_c0_g1,TRINITY_DN1087_c0_g1,TRINITY_DN4180_c0_g1,TRINITY_DN1608_c0_g1,TRINITY_DN2576_c1_g1,TRINITY_DN60_c13_g1,TRINITY_DN1538_c0_g1,TRINITY_DN2029_c2_g1,TRINITY_DN947_c1_g1	TRINITY_DN5518_c0_g1,TRINITY_DN405_c1_g1,TRINITY_DN5984_c0_g1,TRINITY_DN14074_c0_g1	http://www.kegg.jp/kegg-bin/show_pathway?map=map03030&multi_query=K02327+%23FFFFFF,red%0d%0aK02324+%23FFFFFF,red%0d%0aK10742+%23FFFFFF,red%0d%0aK10754+%23FFFFFF,red%0d%0aK04799+%23FFFFFF,red%0d%0aK02540+%23FFFFFF,red%0d%0aK02210+%23FFFFFF,red%0d%0aK02541+%23FFFFFF,red%0d%0aK10756+%23FFFFFF,red%0d%0aK10743+%23FFFFFF,green%0d%0aK02320+%23FFFFFF,red%0d%0aK02325+%23FFFFFF,red%0d%0aK02684+%23FFFFFF,re…
ko00740	Riboflavin metabolism	Metabolism	Metabolism of cofactors and vitamins	2	3	5	8	0.0968396	0.782459	TRINITY_DN217_c14_g1,TRINITY_DN7679_c0_g1	TRINITY_DN2527_c0_g1,TRINITY_DN388_c0_g1,TRINITY_DN2609_c0_g1	http://www.kegg.jp/kegg-bin/show_pathway?map=map00740&multi_query=K00794+%23FFFFFF,green%0d%0aK01497+%23FFFFFF,green%0d%0aK02858+%23FFFFFF,green%0d%0aK00953+%23FFFFFF,red%0d%0a
ko00520	Amino sugar and nucleotide sugar metabolism	Metabolism	Carbohydrate metabolism	20	17	37	90	0.0986885	0.782459	TRINITY_DN3691_c0_g1,TRINITY_DN1478_c0_g1,TRINITY_DN101_c6_g1,TRINITY_DN1478_c0_g2,TRINITY_DN861_c0_g2,TRINITY_DN5721_c0_g1,TRINITY_DN408_c0_g1,TRINITY_DN6969_c0_g1,TRINITY_DN15221_c0_g1,TRINITY_DN7343_c0_g1,TRINITY_DN5977_c0_g1,TRINITY_DN4357_c0_g1,TRINITY_DN8807_c0_g1,TRINITY_DN8145_c0_g1,TRINITY_DN6546_c0_g1,TRINITY_DN4252_c0_g1,TRINITY_DN4836_c0_g1,TRINITY_DN6618_c0_g1,TRINITY_DN762_c0_g2,TRI…	TRINITY_DN1878_c0_g1,TRINITY_DN351_c5_g1,TRINITY_DN729_c10_g1,TRINITY_DN1412_c0_g1,TRINITY_DN1878_c0_g2,TRINITY_DN642_c2_g1,TRINITY_DN229_c0_g1,TRINITY_DN3439_c1_g1,TRINITY_DN61_c2_g1,TRINITY_DN1147_c1_g1,TRINITY_DN3317_c1_g1,TRINITY_DN941_c0_g1,TRINITY_DN1332_c1_g1,TRINITY_DN973_c2_g1,TRINITY_DN292_c0_g2,TRINITY_DN3277_c1_g1,TRINITY_DN1332_c1_g2	http://www.kegg.jp/kegg-bin/show_pathway?map=map00520&multi_query=K01711+%23FFFFFF,green%0d%0aK00326+%23FFFFFF,purple%0d%0aK00844+%23FFFFFF,green%0d%0aK02377+%23FFFFFF,green%0d%0aK00012+%23FFFFFF,green%0d%0aK02564+%23FFFFFF,green%0d%0aK01209+%23FFFFFF,red%0d%0aK12373+%23FFFFFF,green%0d%0aK01810+%23FFFFFF,green%0d%0aK00963+%23FFFFFF,purple%0d%0aK00820+%23FFFFFF,red%0d%0aK00698+%23FFFFFF,red%0d%0aK…
ko00030	Pentose phosphate pathway	Metabolism	Carbohydrate metabolism	0	10	10	20	0.105927	0.783862	-	TRINITY_DN1302_c0_g1,TRINITY_DN729_c10_g1,TRINITY_DN173_c4_g1,TRINITY_DN1327_c1_g1,TRINITY_DN1579_c0_g1,TRINITY_DN3755_c0_g1,TRINITY_DN1147_c1_g1,TRINITY_DN1532_c0_g1,TRINITY_DN2339_c0_g1,TRINITY_DN101_c5_g1	http://www.kegg.jp/kegg-bin/show_pathway?map=map00030&multi_query=K01624+%23FFFFFF,green%0d%0aK01810+%23FFFFFF,green%0d%0aK01621+%23FFFFFF,green%0d%0aK00616+%23FFFFFF,green%0d%0aK00036+%23FFFFFF,green%0d%0aK00948+%23FFFFFF,green%0d%0aK00033+%23FFFFFF,green%0d%0aK01835+%23FFFFFF,green%0d%0aK03841+%23FFFFFF,green%0d%0a
ko00270	Cysteine and methionine metabolism	Metabolism	Amino acid metabolism	7	13	20	46	0.119614	0.829822	TRINITY_DN5517_c0_g1,TRINITY_DN4882_c0_g1,TRINITY_DN225_c5_g2,TRINITY_DN6483_c0_g1,TRINITY_DN1644_c1_g1,TRINITY_DN5345_c0_g1,TRINITY_DN1057_c2_g1	TRINITY_DN2249_c0_g1,TRINITY_DN2668_c0_g1,TRINITY_DN1773_c0_g1,TRINITY_DN2418_c0_g3,TRINITY_DN1031_c0_g1,TRINITY_DN4256_c0_g1,TRINITY_DN2406_c1_g2,TRINITY_DN501_c7_g1,TRINITY_DN6605_c3_g1,TRINITY_DN2726_c0_g2,TRINITY_DN560_c3_g1,TRINITY_DN274_c1_g1,TRINITY_DN5816_c0_g1	http://www.kegg.jp/kegg-bin/show_pathway?map=map00270&multi_query=K00838+%23FFFFFF,green%0d%0aK01739+%23FFFFFF,green%0d%0aK00789+%23FFFFFF,green%0d%0aK17069+%23FFFFFF,green%0d%0aK00026+%23FFFFFF,green%0d%0aK00058+%23FFFFFF,green%0d%0aK14454+%23FFFFFF,red%0d%0aK00547+%23FFFFFF,green%0d%0aK00641+%23FFFFFF,red%0d%0aK01738+%23FFFFFF,purple%0d%0aK00899+%23FFFFFF,red%0d%0aK08968+%23FFFFFF,green%0d%0aK0…
ko00910	Nitrogen metabolism	Metabolism	Energy metabolism	1	5	6	11	0.135139	0.862482	TRINITY_DN8_c1_g1	TRINITY_DN2078_c0_g1,TRINITY_DN371_c7_g2,TRINITY_DN3553_c0_g1,TRINITY_DN7341_c0_g1,TRINITY_DN328_c0_g1	http://www.kegg.jp/kegg-bin/show_pathway?map=map00910&multi_query=K01455+%23FFFFFF,green%0d%0aK01915+%23FFFFFF,green%0d%0aK15371+%23FFFFFF,green%0d%0aK00264+%23FFFFFF,green%0d%0aK02575+%23FFFFFF,red%0d%0a
ko00561	Glycerolipid metabolism	Metabolism	Lipid metabolism	4	8	12	26	0.139862	0.862482	TRINITY_DN8877_c0_g1,TRINITY_DN456_c0_g1,TRINITY_DN6138_c0_g1,TRINITY_DN7106_c0_g1	TRINITY_DN413_c1_g1,TRINITY_DN2042_c1_g1,TRINITY_DN2547_c0_g1,TRINITY_DN2663_c0_g1,TRINITY_DN870_c0_g1,TRINITY_DN3845_c0_g1,TRINITY_DN2233_c1_g1,TRINITY_DN14827_c0_g1	http://www.kegg.jp/kegg-bin/show_pathway?map=map00561&multi_query=K07407+%23FFFFFF,green%0d%0aK13509+%23FFFFFF,red%0d%0aK14457+%23FFFFFF,red%0d%0aK00128+%23FFFFFF,green%0d%0aK18097+%23FFFFFF,purple%0d%0aK13519+%23FFFFFF,purple%0d%0aK15918+%23FFFFFF,green%0d%0aK00863+%23FFFFFF,green%0d%0a
ko03060	Protein export	Genetic Information Processing	Folding, sorting and degradation	3	8	11	24	0.160741	0.939066	TRINITY_DN6978_c0_g1,TRINITY_DN3297_c0_g1,TRINITY_DN927_c0_g1	TRINITY_DN3461_c1_g1,TRINITY_DN897_c2_g1,TRINITY_DN4263_c1_g2,TRINITY_DN320_c3_g1,TRINITY_DN1316_c0_g1,TRINITY_DN4_c3_g2,TRINITY_DN3328_c0_g1,TRINITY_DN1947_c0_g1	http://www.kegg.jp/kegg-bin/show_pathway?map=map03060&multi_query=K13431+%23FFFFFF,red%0d%0aK03217+%23FFFFFF,red%0d%0aK03104+%23FFFFFF,green%0d%0aK10956+%23FFFFFF,green%0d%0aK09648+%23FFFFFF,green%0d%0aK09481+%23FFFFFF,green%0d%0aK13280+%23FFFFFF,green%0d%0aK09490+%23FFFFFF,green%0d%0aK12947+%23FFFFFF,green%0d%0a
ko00562	Inositol phosphate metabolism	Metabolism	Carbohydrate metabolism	8	4	12	27	0.177013	0.982422	TRINITY_DN7650_c0_g1,TRINITY_DN543_c1_g1,TRINITY_DN1404_c1_g1,TRINITY_DN2148_c0_g1,TRINITY_DN8634_c0_g1,TRINITY_DN217_c18_g1,TRINITY_DN6389_c1_g1,TRINITY_DN171_c1_g1	TRINITY_DN777_c0_g1,TRINITY_DN2435_c0_g1,TRINITY_DN2165_c0_g2,TRINITY_DN2930_c0_g1	http://www.kegg.jp/kegg-bin/show_pathway?map=map00562&multi_query=K01803+%23FFFFFF,green%0d%0aK01099+%23FFFFFF,green%0d%0aK13711+%23FFFFFF,red%0d%0aK01771+%23FFFFFF,red%0d%0aK05857+%23FFFFFF,red%0d%0aK00888+%23FFFFFF,red%0d%0aK20279+%23FFFFFF,red%0d%0aK00469+%23FFFFFF,green%0d%0aK01092+%23FFFFFF,green%0d%0a
ko00900	Terpenoid backbone biosynthesis	Metabolism	Metabolism of terpenoids and polyketides	2	6	8	17	0.191979	0.986296	TRINITY_DN223_c1_g1,TRINITY_DN5972_c0_g1	TRINITY_DN465_c0_g1,TRINITY_DN6175_c0_g1,TRINITY_DN78_c1_g1,TRINITY_DN217_c3_g1,TRINITY_DN672_c0_g1,TRINITY_DN228_c5_g1	http://www.kegg.jp/kegg-bin/show_pathway?map=map00900&multi_query=K00787+%23FFFFFF,red%0d%0aK01597+%23FFFFFF,green%0d%0aK06013+%23FFFFFF,green%0d%0aK00626+%23FFFFFF,green%0d%0aK01641+%23FFFFFF,purple%0d%0aK00021+%23FFFFFF,green%0d%0a
ko00630	Glyoxylate and dicarboxylate metabolism	Metabolism	Carbohydrate metabolism	4	14	18	44	0.214384	0.986296	TRINITY_DN5048_c0_g1,TRINITY_DN577_c1_g1,TRINITY_DN5853_c0_g1,TRINITY_DN1621_c1_g1	TRINITY_DN3735_c0_g1,TRINITY_DN5146_c0_g1,TRINITY_DN3553_c0_g1,TRINITY_DN413_c1_g1,TRINITY_DN1665_c0_g1,TRINITY_DN371_c7_g2,TRINITY_DN6605_c3_g1,TRINITY_DN672_c0_g1,TRINITY_DN7341_c0_g1,TRINITY_DN3053_c1_g1,TRINITY_DN674_c2_g1,TRINITY_DN863_c1_g3,TRINITY_DN3309_c0_g1,TRINITY_DN2739_c0_g1	http://www.kegg.jp/kegg-bin/show_pathway?map=map00630&multi_query=K00026+%23FFFFFF,green%0d%0aK03781+%23FFFFFF,purple%0d%0aK00626+%23FFFFFF,green%0d%0aK15918+%23FFFFFF,green%0d%0aK01455+%23FFFFFF,green%0d%0aK00600+%23FFFFFF,green%0d%0aK01915+%23FFFFFF,green%0d%0aK00122+%23FFFFFF,green%0d%0aK01637+%23FFFFFF,green%0d%0aK01638+%23FFFFFF,green%0d%0aK00382+%23FFFFFF,green%0d%0aK01647+%23FFFFFF,purple%…
ko00020	Citrate cycle (TCA cycle)	Metabolism	Carbohydrate metabolism	1	11	12	28	0.218337	0.986296	TRINITY_DN5853_c0_g1	TRINITY_DN798_c2_g1,TRINITY_DN2677_c0_g2,TRINITY_DN3309_c0_g1,TRINITY_DN141_c3_g1,TRINITY_DN1879_c0_g1,TRINITY_DN3933_c1_g1,TRINITY_DN723_c9_g1,TRINITY_DN1665_c0_g1,TRINITY_DN202_c3_g1,TRINITY_DN6605_c3_g1,TRINITY_DN14918_c0_g1	http://www.kegg.jp/kegg-bin/show_pathway?map=map00020&multi_query=K00237+%23FFFFFF,green%0d%0aK01647+%23FFFFFF,purple%0d%0aK00382+%23FFFFFF,green%0d%0aK00164+%23FFFFFF,green%0d%0aK00235+%23FFFFFF,green%0d%0aK01899+%23FFFFFF,green%0d%0aK00234+%23FFFFFF,green%0d%0aK01900+%23FFFFFF,green%0d%0aK00026+%23FFFFFF,green%0d%0aK01648+%23FFFFFF,green%0d%0aK00030+%23FFFFFF,green%0d%0a
ko00514	Other types of O-glycan biosynthesis	Metabolism	Glycan biosynthesis and metabolism	0	3	3	5	0.22284	0.986296	-	TRINITY_DN2426_c0_g1,TRINITY_DN70_c7_g1,TRINITY_DN1969_c1_g1	http://www.kegg.jp/kegg-bin/show_pathway?map=map00514&multi_query=K00728+%23FFFFFF,green%0d%0aK10967+%23FFFFFF,green%0d%0a
ko00620	Pyruvate metabolism	Metabolism	Carbohydrate metabolism	0	16	16	39	0.228985	0.986296	-	TRINITY_DN6605_c3_g1,TRINITY_DN1596_c1_g1,TRINITY_DN674_c2_g1,TRINITY_DN872_c3_g2,TRINITY_DN672_c0_g1,TRINITY_DN3933_c0_g1,TRINITY_DN1219_c1_g1,TRINITY_DN1665_c0_g1,TRINITY_DN930_c2_g1,TRINITY_DN262_c0_g1,TRINITY_DN2342_c0_g1,TRINITY_DN1476_c0_g1,TRINITY_DN2233_c1_g1,TRINITY_DN173_c0_g1,TRINITY_DN863_c1_g3,TRINITY_DN4442_c0_g1	http://www.kegg.jp/kegg-bin/show_pathway?map=map00620&multi_query=K00029+%23FFFFFF,green%0d%0aK01649+%23FFFFFF,green%0d%0aK00382+%23FFFFFF,green%0d%0aK01069+%23FFFFFF,green%0d%0aK00026+%23FFFFFF,green%0d%0aK00626+%23FFFFFF,green%0d%0aK00128+%23FFFFFF,green%0d%0aK01638+%23FFFFFF,green%0d%0aK01067+%23FFFFFF,green%0d%0aK13953+%23FFFFFF,green%0d%0aK00102+%23FFFFFF,green%0d%0aK00873+%23FFFFFF,green%0d…
ko00450	Selenocompound metabolism	Metabolism	Metabolism of other amino acids	0	5	5	10	0.231024	0.986296	-	TRINITY_DN2726_c0_g2,TRINITY_DN3158_c0_g1,TRINITY_DN5816_c0_g1,TRINITY_DN2167_c0_g1,TRINITY_DN2406_c1_g2	http://www.kegg.jp/kegg-bin/show_pathway?map=map00450&multi_query=K01739+%23FFFFFF,green%0d%0aK00384+%23FFFFFF,green%0d%0aK00958+%23FFFFFF,green%0d%0a
ko00360	Phenylalanine metabolism	Metabolism	Amino acid metabolism	3	9	12	29	0.26319	0.999866	TRINITY_DN5517_c0_g1,TRINITY_DN10339_c0_g1,TRINITY_DN978_c0_g1	TRINITY_DN3081_c0_g1,TRINITY_DN19_c0_g2,TRINITY_DN4295_c0_g1,TRINITY_DN14791_c0_g1,TRINITY_DN1265_c0_g1,TRINITY_DN5764_c0_g1,TRINITY_DN2002_c1_g1,TRINITY_DN3354_c0_g1,TRINITY_DN1031_c0_g1	http://www.kegg.jp/kegg-bin/show_pathway?map=map00360&multi_query=K00838+%23FFFFFF,green%0d%0aK14454+%23FFFFFF,red%0d%0aK10775+%23FFFFFF,green%0d%0aK07253+%23FFFFFF,green%0d%0aK01426+%23FFFFFF,green%0d%0aK00276+%23FFFFFF,purple%0d%0a
ko00564	Glycerophospholipid metabolism	Metabolism	Lipid metabolism	13	8	21	54	0.275142	0.999866	TRINITY_DN284_c2_g1,TRINITY_DN43_c1_g1,TRINITY_DN1428_c1_g1,TRINITY_DN6351_c0_g1,TRINITY_DN6836_c0_g1,TRINITY_DN9757_c0_g1,TRINITY_DN8527_c0_g1,TRINITY_DN6138_c0_g1,TRINITY_DN456_c0_g1,TRINITY_DN1407_c1_g1,TRINITY_DN1853_c0_g1,TRINITY_DN7796_c0_g1,TRINITY_DN7299_c0_g1	TRINITY_DN163_c2_g1,TRINITY_DN4001_c0_g1,TRINITY_DN3937_c0_g1,TRINITY_DN361_c3_g1,TRINITY_DN870_c0_g1,TRINITY_DN4991_c0_g1,TRINITY_DN288_c0_g2,TRINITY_DN366_c1_g1	http://www.kegg.jp/kegg-bin/show_pathway?map=map00564&multi_query=K06130+%23FFFFFF,red%0d%0aK13621+%23FFFFFF,red%0d%0aK01115+%23FFFFFF,red%0d%0aK14676+%23FFFFFF,red%0d%0aK01613+%23FFFFFF,green%0d%0aK01049+%23FFFFFF,green%0d%0aK08744+%23FFFFFF,green%0d%0aK00993+%23FFFFFF,green%0d%0aK13535+%23FFFFFF,red%0d%0aK06123+%23FFFFFF,red%0d%0aK13519+%23FFFFFF,purple%0d%0aK00995+%23FFFFFF,green%0d%0aK14621+%…
ko00650	Butanoate metabolism	Metabolism	Carbohydrate metabolism	2	5	7	16	0.287558	0.999866	TRINITY_DN4153_c0_g1,TRINITY_DN5972_c0_g1	TRINITY_DN1753_c1_g1,TRINITY_DN228_c5_g1,TRINITY_DN672_c0_g1,TRINITY_DN462_c0_g1,TRINITY_DN14625_c0_g1	http://www.kegg.jp/kegg-bin/show_pathway?map=map00650&multi_query=K00135+%23FFFFFF,red%0d%0aK01580+%23FFFFFF,green%0d%0aK00626+%23FFFFFF,green%0d%0aK01641+%23FFFFFF,purple%0d%0aK00823+%23FFFFFF,green%0d%0aK01907+%23FFFFFF,green%0d%0a
ko00565	Ether lipid metabolism	Metabolism	Lipid metabolism	5	2	7	16	0.287558	0.999866	TRINITY_DN9757_c0_g1,TRINITY_DN8527_c0_g1,TRINITY_DN6138_c0_g1,TRINITY_DN7299_c0_g1,TRINITY_DN43_c1_g1	TRINITY_DN288_c0_g2,TRINITY_DN870_c0_g1	http://www.kegg.jp/kegg-bin/show_pathway?map=map00565&multi_query=K01115+%23FFFFFF,red%0d%0aK00993+%23FFFFFF,green%0d%0aK14621+%23FFFFFF,red%0d%0aK13519+%23FFFFFF,purple%0d%0aK06123+%23FFFFFF,red%0d%0a
ko04213	Longevity regulating pathway - multiple species	Organismal Systems	Aging	13	6	19	49	0.29486	0.999866	TRINITY_DN7100_c0_g1,TRINITY_DN351_c1_g2,TRINITY_DN1617_c0_g2,TRINITY_DN1621_c1_g1,TRINITY_DN216_c3_g2,TRINITY_DN97_c6_g1,TRINITY_DN5048_c0_g1,TRINITY_DN9702_c0_g1,TRINITY_DN7117_c0_g1,TRINITY_DN577_c1_g1,TRINITY_DN8334_c0_g1,TRINITY_DN7276_c0_g1,TRINITY_DN2300_c3_g1	TRINITY_DN4248_c0_g1,TRINITY_DN4841_c0_g1,TRINITY_DN133_c5_g1,TRINITY_DN3053_c1_g1,TRINITY_DN2293_c2_g1,TRINITY_DN4263_c1_g1	http://www.kegg.jp/kegg-bin/show_pathway?map=map04213&multi_query=K04564+%23FFFFFF,green%0d%0aK03283+%23FFFFFF,purple%0d%0aK04345+%23FFFFFF,green%0d%0aK08339+%23FFFFFF,green%0d%0aK03781+%23FFFFFF,purple%0d%0aK04565+%23FFFFFF,green%0d%0aK03695+%23FFFFFF,red%0d%0aK11121+%23FFFFFF,red%0d%0a
ko00510	N-Glycan biosynthesis	Metabolism	Glycan biosynthesis and metabolism	2	14	16	41	0.307931	0.999866	TRINITY_DN1734_c0_g3,TRINITY_DN1099_c0_g1	TRINITY_DN6419_c0_g1,TRINITY_DN1719_c0_g1,TRINITY_DN4028_c0_g2,TRINITY_DN1889_c0_g1,TRINITY_DN1081_c1_g1,TRINITY_DN1770_c2_g1,TRINITY_DN2436_c1_g1,TRINITY_DN748_c0_g2,TRINITY_DN3544_c1_g1,TRINITY_DN973_c4_g1,TRINITY_DN1105_c2_g1,TRINITY_DN996_c1_g1,TRINITY_DN1651_c0_g1,TRINITY_DN7252_c0_g1	http://www.kegg.jp/kegg-bin/show_pathway?map=map00510&multi_query=K00721+%23FFFFFF,green%0d%0aK03846+%23FFFFFF,green%0d%0aK12667+%23FFFFFF,green%0d%0aK12666+%23FFFFFF,green%0d%0aK00729+%23FFFFFF,green%0d%0aK07252+%23FFFFFF,red%0d%0aK12668+%23FFFFFF,green%0d%0aK03842+%23FFFFFF,red%0d%0aK05546+%23FFFFFF,green%0d%0aK12670+%23FFFFFF,green%0d%0aK09658+%23FFFFFF,green%0d%0aK01230+%23FFFFFF,green%0d%0aK…
ko04122	Sulfur relay system	Genetic Information Processing	Folding, sorting and degradation	3	2	5	11	0.310929	0.999866	TRINITY_DN5345_c0_g1,TRINITY_DN1436_c1_g1,TRINITY_DN2975_c0_g1	TRINITY_DN2348_c0_g1,TRINITY_DN2141_c0_g1	http://www.kegg.jp/kegg-bin/show_pathway?map=map04122&multi_query=K14171+%23FFFFFF,green%0d%0aK01011+%23FFFFFF,red%0d%0aK03635+%23FFFFFF,red%0d%0aK03639+%23FFFFFF,red%0d%0a
ko00100	Steroid biosynthesis	Metabolism	Lipid metabolism	1	8	9	22	0.32369	0.999866	TRINITY_DN7305_c0_g1	TRINITY_DN3254_c1_g2,TRINITY_DN2104_c1_g1,TRINITY_DN107_c2_g1,TRINITY_DN7161_c0_g1,TRINITY_DN7004_c0_g1,TRINITY_DN5962_c0_g1,TRINITY_DN2103_c1_g1,TRINITY_DN1854_c0_g1	http://www.kegg.jp/kegg-bin/show_pathway?map=map00100&multi_query=K07750+%23FFFFFF,green%0d%0aK05917+%23FFFFFF,green%0d%0aK00227+%23FFFFFF,green%0d%0aK00511+%23FFFFFF,green%0d%0aK00637+%23FFFFFF,green%0d%0aK09831+%23FFFFFF,green%0d%0aK01052+%23FFFFFF,red%0d%0aK00559+%23FFFFFF,green%0d%0a
ko00906	Carotenoid biosynthesis	Metabolism	Metabolism of terpenoids and polyketides	1	0	1	1	0.342117	0.999866	TRINITY_DN7631_c0_g1	-	http://www.kegg.jp/kegg-bin/show_pathway?map=map00906&multi_query=K17842+%23FFFFFF,red%0d%0a
ko00380	Tryptophan metabolism	Metabolism	Amino acid metabolism	4	13	17	45	0.357807	0.999866	TRINITY_DN5048_c0_g1,TRINITY_DN577_c1_g1,TRINITY_DN532_c0_g1,TRINITY_DN1621_c1_g1	TRINITY_DN5061_c0_g1,TRINITY_DN2012_c0_g2,TRINITY_DN1665_c0_g1,TRINITY_DN12071_c0_g1,TRINITY_DN363_c0_g1,TRINITY_DN3053_c1_g1,TRINITY_DN1031_c0_g1,TRINITY_DN672_c0_g1,TRINITY_DN2233_c1_g1,TRINITY_DN4295_c0_g1,TRINITY_DN749_c3_g1,TRINITY_DN363_c0_g2,TRINITY_DN1265_c0_g1	http://www.kegg.jp/kegg-bin/show_pathway?map=map00380&multi_query=K01426+%23FFFFFF,green%0d%0aK00463+%23FFFFFF,purple%0d%0aK00128+%23FFFFFF,green%0d%0aK03781+%23FFFFFF,purple%0d%0aK00452+%23FFFFFF,green%0d%0aK00382+%23FFFFFF,green%0d%0aK00626+%23FFFFFF,green%0d%0aK14338+%23FFFFFF,green%0d%0aK00838+%23FFFFFF,green%0d%0aK14265+%23FFFFFF,green%0d%0a
ko00260	Glycine, serine and threonine metabolism	Metabolism	Amino acid metabolism	8	9	17	45	0.357807	0.999866	TRINITY_DN5510_c0_g1,TRINITY_DN640_c0_g1,TRINITY_DN933_c0_g1,TRINITY_DN4242_c0_g1,TRINITY_DN3800_c0_g1,TRINITY_DN978_c0_g1,TRINITY_DN1256_c0_g1,TRINITY_DN10339_c0_g1	TRINITY_DN2002_c1_g1,TRINITY_DN15_c9_g1,TRINITY_DN2257_c0_g1,TRINITY_DN3018_c0_g1,TRINITY_DN6320_c0_g1,TRINITY_DN2249_c0_g1,TRINITY_DN3735_c0_g1,TRINITY_DN413_c1_g1,TRINITY_DN1665_c0_g1	http://www.kegg.jp/kegg-bin/show_pathway?map=map00260&multi_query=K00058+%23FFFFFF,green%0d%0aK00600+%23FFFFFF,green%0d%0aK15918+%23FFFFFF,green%0d%0aK00108+%23FFFFFF,red%0d%0aK00306+%23FFFFFF,green%0d%0aK01620+%23FFFFFF,green%0d%0aK00382+%23FFFFFF,green%0d%0aK16066+%23FFFFFF,red%0d%0aK00276+%23FFFFFF,purple%0d%0aK15633+%23FFFFFF,green%0d%0aK01754+%23FFFFFF,red%0d%0aK15634+%23FFFFFF,purple%0d%0a
ko00052	Galactose metabolism	Metabolism	Carbohydrate metabolism	5	6	11	29	0.402555	0.999866	TRINITY_DN7343_c0_g1,TRINITY_DN489_c2_g1,TRINITY_DN2588_c0_g1,TRINITY_DN762_c0_g2,TRINITY_DN5977_c0_g1	TRINITY_DN2663_c0_g1,TRINITY_DN3039_c1_g1,TRINITY_DN351_c5_g1,TRINITY_DN973_c2_g1,TRINITY_DN188_c0_g2,TRINITY_DN1147_c1_g1	http://www.kegg.jp/kegg-bin/show_pathway?map=map00052&multi_query=K00844+%23FFFFFF,green%0d%0aK00963+%23FFFFFF,purple%0d%0aK00965+%23FFFFFF,red%0d%0aK01835+%23FFFFFF,green%0d%0aK01187+%23FFFFFF,purple%0d%0aK01193+%23FFFFFF,red%0d%0aK07407+%23FFFFFF,green%0d%0a
ko00220	Arginine biosynthesis	Metabolism	Amino acid metabolism	1	5	6	15	0.409872	0.999866	TRINITY_DN5517_c0_g1	TRINITY_DN371_c7_g2,TRINITY_DN2078_c0_g1,TRINITY_DN7341_c0_g1,TRINITY_DN296_c1_g1,TRINITY_DN1637_c0_g1	http://www.kegg.jp/kegg-bin/show_pathway?map=map00220&multi_query=K01915+%23FFFFFF,green%0d%0aK15371+%23FFFFFF,green%0d%0aK14454+%23FFFFFF,red%0d%0aK00620+%23FFFFFF,green%0d%0aK01940+%23FFFFFF,green%0d%0a
ko00515	Mannose type O-glycan biosynthesis	Metabolism	Glycan biosynthesis and metabolism	0	2	2	4	0.423031	0.999866	-	TRINITY_DN1969_c1_g1,TRINITY_DN70_c7_g1	http://www.kegg.jp/kegg-bin/show_pathway?map=map00515&multi_query=K00728+%23FFFFFF,green%0d%0a
ko00780	Biotin metabolism	Metabolism	Metabolism of cofactors and vitamins	0	2	2	4	0.423031	0.999866	-	TRINITY_DN2918_c1_g1,TRINITY_DN9154_c0_g1	http://www.kegg.jp/kegg-bin/show_pathway?map=map00780&multi_query=K01942+%23FFFFFF,green%0d%0aK00059+%23FFFFFF,green%0d%0a
ko04070	Phosphatidylinositol signaling system	Environmental Information Processing	Signal transduction	7	2	9	24	0.441576	0.999866	TRINITY_DN6389_c1_g1,TRINITY_DN7650_c0_g1,TRINITY_DN1404_c1_g1,TRINITY_DN2148_c0_g1,TRINITY_DN543_c1_g1,TRINITY_DN217_c18_g1,TRINITY_DN8634_c0_g1	TRINITY_DN2165_c0_g2,TRINITY_DN2930_c0_g1	http://www.kegg.jp/kegg-bin/show_pathway?map=map04070&multi_query=K13711+%23FFFFFF,red%0d%0aK01099+%23FFFFFF,green%0d%0aK01092+%23FFFFFF,green%0d%0aK20279+%23FFFFFF,red%0d%0aK00888+%23FFFFFF,red%0d%0aK05857+%23FFFFFF,red%0d%0a
ko00040	Pentose and glucuronate interconversions	Metabolism	Carbohydrate metabolism	5	6	11	30	0.455676	0.999866	TRINITY_DN5977_c0_g1,TRINITY_DN2455_c0_g1,TRINITY_DN7434_c0_g1,TRINITY_DN495_c0_g1,TRINITY_DN7343_c0_g1	TRINITY_DN336_c0_g2,TRINITY_DN941_c0_g1,TRINITY_DN10835_c0_g1,TRINITY_DN351_c5_g1,TRINITY_DN5457_c0_g2,TRINITY_DN1195_c0_g1	http://www.kegg.jp/kegg-bin/show_pathway?map=map00040&multi_query=K18107+%23FFFFFF,green%0d%0aK00012+%23FFFFFF,green%0d%0aK17818+%23FFFFFF,green%0d%0aK00008+%23FFFFFF,green%0d%0aK00963+%23FFFFFF,purple%0d%0aK01213+%23FFFFFF,red%0d%0aK01728+%23FFFFFF,red%0d%0aK01051+%23FFFFFF,green%0d%0aK05351+%23FFFFFF,red%0d%0a
ko03022	Basal transcription factors	Genetic Information Processing	Transcription	10	1	11	30	0.455676	0.999866	TRINITY_DN1361_c0_g1,TRINITY_DN6120_c0_g1,TRINITY_DN1309_c0_g1,TRINITY_DN957_c4_g1,TRINITY_DN857_c1_g1,TRINITY_DN598_c0_g1,TRINITY_DN608_c0_g1,TRINITY_DN1755_c1_g1,TRINITY_DN2076_c1_g1,TRINITY_DN349_c0_g1	TRINITY_DN193_c7_g2	http://www.kegg.jp/kegg-bin/show_pathway?map=map03022&multi_query=K03139+%23FFFFFF,red%0d%0aK03136+%23FFFFFF,red%0d%0aK03128+%23FFFFFF,red%0d%0aK03124+%23FFFFFF,red%0d%0aK03138+%23FFFFFF,red%0d%0aK03133+%23FFFFFF,green%0d%0aK10844+%23FFFFFF,red%0d%0aK03131+%23FFFFFF,red%0d%0aK03125+%23FFFFFF,red%0d%0aK03120+%23FFFFFF,red%0d%0a
ko00860	Porphyrin metabolism	Metabolism	Metabolism of cofactors and vitamins	1	4	5	13	0.475245	0.999866	TRINITY_DN4949_c0_g1	TRINITY_DN2582_c0_g1,TRINITY_DN1419_c1_g1,TRINITY_DN3203_c0_g1,TRINITY_DN170_c0_g1	http://www.kegg.jp/kegg-bin/show_pathway?map=map00860&multi_query=K01772+%23FFFFFF,red%0d%0aK02304+%23FFFFFF,green%0d%0aK02259+%23FFFFFF,green%0d%0aK01698+%23FFFFFF,green%0d%0aK02257+%23FFFFFF,green%0d%0a
ko01040	Biosynthesis of unsaturated fatty acids	Metabolism	Lipid metabolism	3	7	10	28	0.504296	0.999866	TRINITY_DN8437_c0_g1,TRINITY_DN940_c0_g1,TRINITY_DN10643_c0_g1	TRINITY_DN1500_c0_g1,TRINITY_DN2549_c0_g1,TRINITY_DN10605_c0_g1,TRINITY_DN1625_c0_g1,TRINITY_DN3272_c0_g2,TRINITY_DN2087_c2_g1,TRINITY_DN54_c0_g2	http://www.kegg.jp/kegg-bin/show_pathway?map=map01040&multi_query=K08764+%23FFFFFF,red%0d%0aK10251+%23FFFFFF,green%0d%0aK07513+%23FFFFFF,green%0d%0aK00507+%23FFFFFF,purple%0d%0aK10256+%23FFFFFF,green%0d%0a
ko00230	Purine metabolism	Metabolism	Nucleotide metabolism	5	12	17	49	0.525829	0.999866	TRINITY_DN5817_c0_g1,TRINITY_DN227_c0_g1,TRINITY_DN4214_c0_g1,TRINITY_DN1418_c0_g1,TRINITY_DN7210_c0_g1	TRINITY_DN1147_c1_g1,TRINITY_DN3094_c1_g1,TRINITY_DN3755_c0_g1,TRINITY_DN813_c2_g3,TRINITY_DN3712_c1_g1,TRINITY_DN488_c0_g2,TRINITY_DN3043_c0_g1,TRINITY_DN2682_c0_g1,TRINITY_DN3712_c0_g2,TRINITY_DN246_c1_g1,TRINITY_DN2167_c0_g1,TRINITY_DN2168_c0_g1	http://www.kegg.jp/kegg-bin/show_pathway?map=map00230&multi_query=K07023+%23FFFFFF,red%0d%0aK07127+%23FFFFFF,green%0d%0aK00948+%23FFFFFF,green%0d%0aK01477+%23FFFFFF,red%0d%0aK01466+%23FFFFFF,green%0d%0aK00940+%23FFFFFF,green%0d%0aK10808+%23FFFFFF,green%0d%0aK00759+%23FFFFFF,green%0d%0aK00856+%23FFFFFF,green%0d%0aK01835+%23FFFFFF,green%0d%0aK00365+%23FFFFFF,red%0d%0aK00764+%23FFFFFF,green%0d%0aK00…
ko00600	Sphingolipid metabolism	Metabolism	Lipid metabolism	2	3	5	14	0.552854	0.999866	TRINITY_DN1909_c1_g1,TRINITY_DN6431_c0_g1	TRINITY_DN4153_c1_g1,TRINITY_DN941_c1_g2,TRINITY_DN2663_c0_g1	http://www.kegg.jp/kegg-bin/show_pathway?map=map00600&multi_query=K07407+%23FFFFFF,green%0d%0aK00654+%23FFFFFF,green%0d%0aK04713+%23FFFFFF,green%0d%0aK04709+%23FFFFFF,red%0d%0aK04718+%23FFFFFF,red%0d%0a
ko00591	Linoleic acid metabolism	Metabolism	Lipid metabolism	2	0	2	5	0.556492	0.999866	TRINITY_DN43_c1_g1,TRINITY_DN7299_c0_g1	-	http://www.kegg.jp/kegg-bin/show_pathway?map=map00591&multi_query=K14621+%23FFFFFF,red%0d%0a
ko00250	Alanine, aspartate and glutamate metabolism	Metabolism	Amino acid metabolism	3	8	11	32	0.559074	0.999866	TRINITY_DN5517_c0_g1,TRINITY_DN861_c0_g2,TRINITY_DN4153_c0_g1	TRINITY_DN371_c7_g2,TRINITY_DN2078_c0_g1,TRINITY_DN328_c0_g1,TRINITY_DN1753_c1_g1,TRINITY_DN7341_c0_g1,TRINITY_DN246_c1_g1,TRINITY_DN462_c0_g1,TRINITY_DN1637_c0_g1	http://www.kegg.jp/kegg-bin/show_pathway?map=map00250&multi_query=K15371+%23FFFFFF,green%0d%0aK00264+%23FFFFFF,green%0d%0aK00820+%23FFFFFF,red%0d%0aK00764+%23FFFFFF,green%0d%0aK00823+%23FFFFFF,green%0d%0aK01915+%23FFFFFF,green%0d%0aK14454+%23FFFFFF,red%0d%0aK00135+%23FFFFFF,red%0d%0aK01940+%23FFFFFF,green%0d%0aK01580+%23FFFFFF,green%0d%0a
ko00240	Pyrimidine metabolism	Metabolism	Nucleotide metabolism	4	7	11	32	0.559074	0.999866	TRINITY_DN1418_c0_g1,TRINITY_DN3800_c0_g1,TRINITY_DN4242_c0_g1,TRINITY_DN5510_c0_g1	TRINITY_DN765_c0_g1,TRINITY_DN544_c2_g2,TRINITY_DN2188_c0_g1,TRINITY_DN3299_c0_g2,TRINITY_DN813_c2_g3,TRINITY_DN3043_c0_g1,TRINITY_DN488_c0_g2	http://www.kegg.jp/kegg-bin/show_pathway?map=map00240&multi_query=K10808+%23FFFFFF,green%0d%0aK01489+%23FFFFFF,green%0d%0aK01591+%23FFFFFF,green%0d%0aK07023+%23FFFFFF,red%0d%0aK16066+%23FFFFFF,red%0d%0aK00940+%23FFFFFF,green%0d%0aK06287+%23FFFFFF,green%0d%0aK01485+%23FFFFFF,green%0d%0a
ko00513	Various types of N-glycan biosynthesis	Metabolism	Glycan biosynthesis and metabolism	1	11	12	35	0.56032	0.999866	TRINITY_DN1099_c0_g1	TRINITY_DN973_c4_g1,TRINITY_DN7252_c0_g1,TRINITY_DN1651_c0_g1,TRINITY_DN748_c0_g2,TRINITY_DN3544_c1_g1,TRINITY_DN1770_c2_g1,TRINITY_DN1081_c1_g1,TRINITY_DN1889_c0_g1,TRINITY_DN3317_c1_g1,TRINITY_DN6419_c0_g1,TRINITY_DN1719_c0_g1	http://www.kegg.jp/kegg-bin/show_pathway?map=map00513&multi_query=K03842+%23FFFFFF,red%0d%0aK07151+%23FFFFFF,green%0d%0aK12667+%23FFFFFF,green%0d%0aK12670+%23FFFFFF,green%0d%0aK12373+%23FFFFFF,green%0d%0aK12669+%23FFFFFF,green%0d%0aK01230+%23FFFFFF,green%0d%0aK12668+%23FFFFFF,green%0d%0aK12666+%23FFFFFF,green%0d%0aK03846+%23FFFFFF,green%0d%0a
ko00232	Caffeine metabolism	Metabolism	Biosynthesis of other secondary metabolites	1	0	1	2	0.567293	0.999866	TRINITY_DN7210_c0_g1	-	http://www.kegg.jp/kegg-bin/show_pathway?map=map00232&multi_query=K00365+%23FFFFFF,red%0d%0a
ko00660	C5-Branched dibasic acid metabolism	Metabolism	Carbohydrate metabolism	0	1	1	2	0.567293	0.999866	-	TRINITY_DN917_c2_g1	http://www.kegg.jp/kegg-bin/show_pathway?map=map00660&multi_query=K00052+%23FFFFFF,green%0d%0a
ko00909	Sesquiterpenoid and triterpenoid biosynthesis	Metabolism	Metabolism of terpenoids and polyketides	0	1	1	2	0.567293	0.999866	-	TRINITY_DN5962_c0_g1	http://www.kegg.jp/kegg-bin/show_pathway?map=map00909&multi_query=K00511+%23FFFFFF,green%0d%0a
ko00071	Fatty acid degradation	Metabolism	Lipid metabolism	2	9	11	33	0.607831	0.999866	TRINITY_DN553_c0_g2,TRINITY_DN784_c1_g1	TRINITY_DN3933_c0_g1,TRINITY_DN5061_c0_g1,TRINITY_DN1625_c0_g1,TRINITY_DN363_c0_g1,TRINITY_DN872_c3_g2,TRINITY_DN672_c0_g1,TRINITY_DN2233_c1_g1,TRINITY_DN363_c0_g2,TRINITY_DN4442_c0_g1	http://www.kegg.jp/kegg-bin/show_pathway?map=map00071&multi_query=K13953+%23FFFFFF,green%0d%0aK01897+%23FFFFFF,red%0d%0aK07513+%23FFFFFF,green%0d%0aK00128+%23FFFFFF,green%0d%0aK14338+%23FFFFFF,green%0d%0aK00626+%23FFFFFF,green%0d%0a
ko00790	Folate biosynthesis	Metabolism	Metabolism of cofactors and vitamins	2	2	4	12	0.632201	0.999866	TRINITY_DN1436_c1_g1,TRINITY_DN2975_c0_g1	TRINITY_DN2594_c0_g1,TRINITY_DN2527_c0_g1	http://www.kegg.jp/kegg-bin/show_pathway?map=map00790&multi_query=K00079+%23FFFFFF,green%0d%0aK03635+%23FFFFFF,red%0d%0aK03639+%23FFFFFF,red%0d%0aK01497+%23FFFFFF,green%0d%0a
ko03410	Base excision repair	Genetic Information Processing	Replication and repair	6	2	8	25	0.665341	0.999866	TRINITY_DN3712_c0_g1,TRINITY_DN947_c1_g1,TRINITY_DN9673_c0_g1,TRINITY_DN2576_c1_g1,TRINITY_DN1321_c0_g1,TRINITY_DN1608_c0_g1	TRINITY_DN1541_c0_g1,TRINITY_DN3442_c0_g1	http://www.kegg.jp/kegg-bin/show_pathway?map=map03410&multi_query=K03649+%23FFFFFF,green%0d%0aK02324+%23FFFFFF,red%0d%0aK04799+%23FFFFFF,red%0d%0aK10771+%23FFFFFF,red%0d%0aK10798+%23FFFFFF,red%0d%0aK02327+%23FFFFFF,red%0d%0aK10801+%23FFFFFF,green%0d%0aK02325+%23FFFFFF,red%0d%0a
ko04392	Hippo signaling pathway - multiple species	Environmental Information Processing	Signal transduction	1	1	2	6	0.666265	0.999866	TRINITY_DN197_c1_g1	TRINITY_DN930_c1_g1	http://www.kegg.jp/kegg-bin/show_pathway?map=map04392&multi_query=K20237+%23FFFFFF,red%0d%0aK02218+%23FFFFFF,green%0d%0a
ko00130	Ubiquinone and other terpenoid-quinone biosynthesis	Metabolism	Metabolism of cofactors and vitamins	2	3	5	16	0.688475	0.999866	TRINITY_DN1385_c0_g1,TRINITY_DN4788_c0_g2	TRINITY_DN686_c0_g1,TRINITY_DN1031_c0_g1,TRINITY_DN78_c2_g1	http://www.kegg.jp/kegg-bin/show_pathway?map=map00130&multi_query=K06125+%23FFFFFF,purple%0d%0aK03809+%23FFFFFF,green%0d%0aK06127+%23FFFFFF,red%0d%0aK00838+%23FFFFFF,green%0d%0a
ko00290	Valine, leucine and isoleucine biosynthesis	Metabolism	Amino acid metabolism	1	4	5	16	0.688475	0.999866	TRINITY_DN933_c0_g1	TRINITY_DN3823_c0_g2,TRINITY_DN1596_c1_g1,TRINITY_DN2641_c0_g1,TRINITY_DN917_c2_g1	http://www.kegg.jp/kegg-bin/show_pathway?map=map00290&multi_query=K01754+%23FFFFFF,red%0d%0aK00052+%23FFFFFF,green%0d%0aK01687+%23FFFFFF,green%0d%0aK01649+%23FFFFFF,green%0d%0a
ko03450	Non-homologous end-joining	Genetic Information Processing	Replication and repair	4	0	4	13	0.701959	0.999866	TRINITY_DN1695_c1_g1,TRINITY_DN947_c1_g1,TRINITY_DN1672_c1_g1,TRINITY_DN949_c1_g1	-	http://www.kegg.jp/kegg-bin/show_pathway?map=map03450&multi_query=K10884+%23FFFFFF,red%0d%0aK10866+%23FFFFFF,red%0d%0aK10777+%23FFFFFF,red%0d%0aK04799+%23FFFFFF,red%0d%0a
ko00261	Monobactam biosynthesis	Metabolism	Biosynthesis of other secondary metabolites	0	1	1	3	0.715464	0.999866	-	TRINITY_DN2167_c0_g1	http://www.kegg.jp/kegg-bin/show_pathway?map=map00261&multi_query=K00958+%23FFFFFF,green%0d%0a
ko00440	Phosphonate and phosphinate metabolism	Metabolism	Metabolism of other amino acids	0	1	1	3	0.715464	0.999866	-	TRINITY_DN288_c0_g2	http://www.kegg.jp/kegg-bin/show_pathway?map=map00440&multi_query=K00993+%23FFFFFF,green%0d%0a
ko00053	Ascorbate and aldarate metabolism	Metabolism	Carbohydrate metabolism	0	3	3	10	0.721565	0.999866	-	TRINITY_DN2233_c1_g1,TRINITY_DN2435_c0_g1,TRINITY_DN941_c0_g1	http://www.kegg.jp/kegg-bin/show_pathway?map=map00053&multi_query=K00012+%23FFFFFF,green%0d%0aK00469+%23FFFFFF,green%0d%0aK00128+%23FFFFFF,green%0d%0a
ko00592	alpha-Linolenic acid metabolism	Metabolism	Lipid metabolism	2	1	3	10	0.721565	0.999866	TRINITY_DN43_c1_g1,TRINITY_DN7299_c0_g1	TRINITY_DN1625_c0_g1	http://www.kegg.jp/kegg-bin/show_pathway?map=map00592&multi_query=K14621+%23FFFFFF,red%0d%0aK07513+%23FFFFFF,green%0d%0a
ko00750	Vitamin B6 metabolism	Metabolism	Metabolism of cofactors and vitamins	0	3	3	10	0.721565	0.999866	-	TRINITY_DN5066_c0_g1,TRINITY_DN269_c0_g1,TRINITY_DN5770_c0_g1	http://www.kegg.jp/kegg-bin/show_pathway?map=map00750&multi_query=K06215+%23FFFFFF,green%0d%0aK05275+%23FFFFFF,green%0d%0aK08681+%23FFFFFF,green%0d%0a
ko04011	MAPK signaling pathway - yeast	Environmental Information Processing	Signal transduction	15	11	26	82	0.725087	0.999866	TRINITY_DN1046_c1_g1,TRINITY_DN9093_c0_g1,TRINITY_DN124_c4_g1,TRINITY_DN4416_c0_g1,TRINITY_DN4669_c0_g1,TRINITY_DN277_c1_g1,TRINITY_DN1763_c0_g1,TRINITY_DN1621_c1_g1,TRINITY_DN5048_c0_g1,TRINITY_DN7624_c0_g1,TRINITY_DN2148_c0_g1,TRINITY_DN577_c1_g1,TRINITY_DN593_c2_g1,TRINITY_DN677_c1_g2,TRINITY_DN8199_c0_g1	TRINITY_DN3870_c0_g2,TRINITY_DN930_c1_g1,TRINITY_DN5256_c0_g1,TRINITY_DN1132_c0_g1,TRINITY_DN6202_c0_g1,TRINITY_DN540_c2_g1,TRINITY_DN1326_c0_g1,TRINITY_DN4525_c0_g1,TRINITY_DN278_c3_g1,TRINITY_DN225_c2_g1,TRINITY_DN3053_c1_g1	http://www.kegg.jp/kegg-bin/show_pathway?map=map04011&multi_query=K19842+%23FFFFFF,red%0d%0aK04513+%23FFFFFF,green%0d%0aK11227+%23FFFFFF,red%0d%0aK10591+%23FFFFFF,red%0d%0aK03781+%23FFFFFF,purple%0d%0aK19844+%23FFFFFF,red%0d%0aK04627+%23FFFFFF,green%0d%0aK11230+%23FFFFFF,green%0d%0aK19860+%23FFFFFF,green%0d%0aK00888+%23FFFFFF,red%0d%0aK00706+%23FFFFFF,red%0d%0aK02555+%23FFFFFF,green%0d%0aK02220+%…
ko04111	Cell cycle - yeast	Cellular Processes	Cell growth and death	20	6	26	82	0.725087	0.999866	TRINITY_DN2239_c1_g1,TRINITY_DN992_c1_g1,TRINITY_DN3648_c0_g1,TRINITY_DN4401_c0_g1,TRINITY_DN31_c5_g2,TRINITY_DN2555_c0_g1,TRINITY_DN1380_c0_g1,TRINITY_DN2508_c1_g1,TRINITY_DN196_c0_g1,TRINITY_DN604_c0_g1,TRINITY_DN2373_c1_g1,TRINITY_DN2029_c2_g1,TRINITY_DN5595_c0_g1,TRINITY_DN2300_c0_g1,TRINITY_DN3529_c0_g1,TRINITY_DN5901_c0_g2,TRINITY_DN31_c5_g1,TRINITY_DN2150_c0_g1,TRINITY_DN5901_c0_g1,TRINITY…	TRINITY_DN33_c3_g1,TRINITY_DN278_c3_g1,TRINITY_DN2574_c1_g1,TRINITY_DN3870_c0_g2,TRINITY_DN2111_c0_g1,TRINITY_DN4392_c0_g1	http://www.kegg.jp/kegg-bin/show_pathway?map=map04111&multi_query=K02178+%23FFFFFF,red%0d%0aK03364+%23FFFFFF,red%0d%0aK11272+%23FFFFFF,red%0d%0aK02541+%23FFFFFF,red%0d%0aK03094+%23FFFFFF,red%0d%0aK06669+%23FFFFFF,red%0d%0aK02220+%23FFFFFF,green%0d%0aK02365+%23FFFFFF,red%0d%0aK06628+%23FFFFFF,red%0d%0aK06636+%23FFFFFF,red%0d%0aK06671+%23FFFFFF,red%0d%0aK06676+%23FFFFFF,green%0d%0aK06677+%23FFFFFF,…
ko00310	Lysine degradation	Metabolism	Amino acid metabolism	6	4	10	33	0.742093	0.999866	TRINITY_DN397_c1_g1,TRINITY_DN5525_c0_g1,TRINITY_DN6493_c0_g1,TRINITY_DN4153_c0_g1,TRINITY_DN1396_c0_g1,TRINITY_DN628_c0_g1	TRINITY_DN2233_c1_g1,TRINITY_DN1665_c0_g1,TRINITY_DN3018_c0_g1,TRINITY_DN672_c0_g1	http://www.kegg.jp/kegg-bin/show_pathway?map=map00310&multi_query=K00128+%23FFFFFF,green%0d%0aK00135+%23FFFFFF,red%0d%0aK00626+%23FFFFFF,green%0d%0aK00306+%23FFFFFF,green%0d%0aK11419+%23FFFFFF,red%0d%0aK00382+%23FFFFFF,green%0d%0aK14157+%23FFFFFF,red%0d%0aK11426+%23FFFFFF,red%0d%0aK11429+%23FFFFFF,red%0d%0a
ko00603	Glycosphingolipid biosynthesis - globo and isoglobo series	Metabolism	Glycan biosynthesis and metabolism	0	2	2	7	0.752924	0.999866	-	TRINITY_DN3317_c1_g1,TRINITY_DN2663_c0_g1	http://www.kegg.jp/kegg-bin/show_pathway?map=map00603&multi_query=K07407+%23FFFFFF,green%0d%0aK12373+%23FFFFFF,green%0d%0a
ko00770	Pantothenate and CoA biosynthesis	Metabolism	Metabolism of cofactors and vitamins	2	4	6	21	0.77854	0.999866	TRINITY_DN319_c0_g2,TRINITY_DN9990_c0_g1	TRINITY_DN2641_c0_g1,TRINITY_DN1920_c0_g1,TRINITY_DN2233_c1_g1,TRINITY_DN3823_c0_g2	http://www.kegg.jp/kegg-bin/show_pathway?map=map00770&multi_query=K00128+%23FFFFFF,green%0d%0aK02201+%23FFFFFF,green%0d%0aK01687+%23FFFFFF,green%0d%0aK06133+%23FFFFFF,red%0d%0a
ko03020	RNA polymerase	Genetic Information Processing	Transcription	7	5	12	41	0.797892	0.999866	TRINITY_DN82_c0_g1,TRINITY_DN8579_c0_g1,TRINITY_DN10479_c0_g1,TRINITY_DN1748_c1_g1,TRINITY_DN7957_c0_g1,TRINITY_DN864_c0_g1,TRINITY_DN770_c0_g1	TRINITY_DN1797_c0_g1,TRINITY_DN102_c4_g1,TRINITY_DN427_c1_g1,TRINITY_DN10198_c0_g1,TRINITY_DN488_c1_g1	http://www.kegg.jp/kegg-bin/show_pathway?map=map03020&multi_query=K03002+%23FFFFFF,red%0d%0aK03025+%23FFFFFF,red%0d%0aK03018+%23FFFFFF,red%0d%0aK03000+%23FFFFFF,green%0d%0aK03008+%23FFFFFF,green%0d%0aK03009+%23FFFFFF,green%0d%0aK03005+%23FFFFFF,green%0d%0aK03027+%23FFFFFF,red%0d%0aK14721+%23FFFFFF,green%0d%0a
ko04113	Meiosis - yeast	Cellular Processes	Cell growth and death	17	5	22	73	0.807468	0.999866	TRINITY_DN2508_c1_g1,TRINITY_DN1380_c0_g1,TRINITY_DN31_c5_g2,TRINITY_DN604_c0_g1,TRINITY_DN12339_c0_g1,TRINITY_DN2239_c1_g1,TRINITY_DN992_c1_g1,TRINITY_DN3648_c0_g1,TRINITY_DN4401_c0_g1,TRINITY_DN31_c5_g1,TRINITY_DN4180_c0_g1,TRINITY_DN4189_c0_g1,TRINITY_DN2300_c0_g1,TRINITY_DN1063_c0_g1,TRINITY_DN2373_c1_g1,TRINITY_DN1611_c0_g1,TRINITY_DN2029_c2_g1	TRINITY_DN4841_c0_g1,TRINITY_DN2574_c1_g1,TRINITY_DN3870_c0_g2,TRINITY_DN4392_c0_g1,TRINITY_DN2111_c0_g1	http://www.kegg.jp/kegg-bin/show_pathway?map=map04113&multi_query=K02210+%23FFFFFF,red%0d%0aK04345+%23FFFFFF,green%0d%0aK06636+%23FFFFFF,red%0d%0aK02178+%23FFFFFF,red%0d%0aK02220+%23FFFFFF,green%0d%0aK02540+%23FFFFFF,red%0d%0aK02216+%23FFFFFF,red%0d%0aK10878+%23FFFFFF,red%0d%0aK06269+%23FFFFFF,red%0d%0aK02830+%23FFFFFF,green%0d%0aK12761+%23FFFFFF,red%0d%0aK03352+%23FFFFFF,red%0d%0aK02607+%23FFFFF…
ko04146	Peroxisome	Cellular Processes	Transport and catabolism	11	9	20	67	0.813846	0.999866	TRINITY_DN426_c0_g1,TRINITY_DN7325_c0_g1,TRINITY_DN5048_c0_g1,TRINITY_DN577_c1_g1,TRINITY_DN553_c0_g2,TRINITY_DN10643_c0_g1,TRINITY_DN1215_c0_g1,TRINITY_DN1559_c0_g1,TRINITY_DN8437_c0_g1,TRINITY_DN1621_c1_g1,TRINITY_DN784_c1_g1	TRINITY_DN1625_c0_g1,TRINITY_DN4263_c1_g1,TRINITY_DN3018_c0_g1,TRINITY_DN3053_c1_g1,TRINITY_DN181_c2_g2,TRINITY_DN6459_c0_g1,TRINITY_DN4248_c0_g1,TRINITY_DN3654_c0_g1,TRINITY_DN2190_c0_g1	http://www.kegg.jp/kegg-bin/show_pathway?map=map04146&multi_query=K08764+%23FFFFFF,red%0d%0aK00306+%23FFFFFF,green%0d%0aK01796+%23FFFFFF,red%0d%0aK04564+%23FFFFFF,green%0d%0aK03426+%23FFFFFF,green%0d%0aK00624+%23FFFFFF,green%0d%0aK08726+%23FFFFFF,purple%0d%0aK03781+%23FFFFFF,purple%0d%0aK13342+%23FFFFFF,red%0d%0aK04565+%23FFFFFF,green%0d%0aK01897+%23FFFFFF,red%0d%0aK07513+%23FFFFFF,green%0d%0aK15…
ko03040	Spliceosome	Genetic Information Processing	Transcription	20	5	25	83	0.820421	0.999866	TRINITY_DN2329_c1_g1,TRINITY_DN536_c6_g1,TRINITY_DN351_c1_g2,TRINITY_DN169_c0_g1,TRINITY_DN543_c0_g1,TRINITY_DN3100_c0_g1,TRINITY_DN431_c1_g1,TRINITY_DN9702_c0_g1,TRINITY_DN216_c3_g2,TRINITY_DN383_c0_g1,TRINITY_DN141_c2_g1,TRINITY_DN196_c3_g1,TRINITY_DN7117_c0_g1,TRINITY_DN10635_c0_g1,TRINITY_DN2300_c3_g1,TRINITY_DN6567_c0_g1,TRINITY_DN2675_c0_g1,TRINITY_DN1784_c0_g1,TRINITY_DN5825_c5_g1,TRINITY_…	TRINITY_DN723_c2_g2,TRINITY_DN133_c2_g1,TRINITY_DN2293_c2_g1,TRINITY_DN851_c1_g1,TRINITY_DN2298_c0_g1	http://www.kegg.jp/kegg-bin/show_pathway?map=map03040&multi_query=K12859+%23FFFFFF,green%0d%0aK12811+%23FFFFFF,red%0d%0aK12824+%23FFFFFF,red%0d%0aK12818+%23FFFFFF,red%0d%0aK12879+%23FFFFFF,red%0d%0aK12813+%23FFFFFF,green%0d%0aK12857+%23FFFFFF,green%0d%0aK12867+%23FFFFFF,red%0d%0aK12820+%23FFFFFF,red%0d%0aK11984+%23FFFFFF,red%0d%0aK11096+%23FFFFFF,green%0d%0aK12816+%23FFFFFF,red%0d%0aK03283+%23FFF…
ko03440	Homologous recombination	Genetic Information Processing	Replication and repair	5	2	7	26	0.840378	0.999866	TRINITY_DN3762_c0_g1,TRINITY_DN3712_c0_g1,TRINITY_DN1672_c1_g1,TRINITY_DN4407_c0_g1,TRINITY_DN4630_c0_g1	TRINITY_DN313_c5_g1,TRINITY_DN3493_c1_g1	http://www.kegg.jp/kegg-bin/show_pathway?map=map03440&multi_query=K02327+%23FFFFFF,red%0d%0aK10958+%23FFFFFF,green%0d%0aK08775+%23FFFFFF,red%0d%0aK03165+%23FFFFFF,red%0d%0aK10866+%23FFFFFF,red%0d%0aK10870+%23FFFFFF,green%0d%0aK04482+%23FFFFFF,red%0d%0a
ko03013	Nucleocytoplasmic transport	Genetic Information Processing	Translation	18	4	22	75	0.848711	0.999866	TRINITY_DN2341_c0_g1,TRINITY_DN1596_c0_g1,TRINITY_DN1308_c1_g1,TRINITY_DN5844_c0_g1,TRINITY_DN3638_c0_g1,TRINITY_DN2329_c1_g1,TRINITY_DN2752_c0_g1,TRINITY_DN2146_c0_g1,TRINITY_DN1448_c0_g1,TRINITY_DN196_c3_g1,TRINITY_DN5858_c0_g1,TRINITY_DN367_c0_g1,TRINITY_DN1319_c5_g2,TRINITY_DN3389_c0_g1,TRINITY_DN1504_c0_g1,TRINITY_DN1337_c0_g1,TRINITY_DN577_c0_g1,TRINITY_DN6567_c0_g1	TRINITY_DN4590_c0_g1,TRINITY_DN412_c3_g1,TRINITY_DN479_c0_g1,TRINITY_DN1931_c0_g1	http://www.kegg.jp/kegg-bin/show_pathway?map=map03013&multi_query=K03231+%23FFFFFF,red%0d%0aK14297+%23FFFFFF,red%0d%0aK14310+%23FFFFFF,red%0d%0aK14311+%23FFFFFF,red%0d%0aK12878+%23FFFFFF,red%0d%0aK14308+%23FFFFFF,red%0d%0aK14290+%23FFFFFF,red%0d%0aK12879+%23FFFFFF,red%0d%0aK14285+%23FFFFFF,green%0d%0aK14004+%23FFFFFF,green%0d%0aK07562+%23FFFFFF,red%0d%0aK14326+%23FFFFFF,red%0d%0aK14284+%23FFFFFF,…
ko00330	Arginine and proline metabolism	Metabolism	Amino acid metabolism	3	4	7	27	0.869519	0.999866	TRINITY_DN8120_c0_g1,TRINITY_DN5517_c0_g1,TRINITY_DN876_c0_g1	TRINITY_DN544_c2_g2,TRINITY_DN4295_c0_g1,TRINITY_DN2233_c1_g1,TRINITY_DN1265_c0_g1	http://www.kegg.jp/kegg-bin/show_pathway?map=map00330&multi_query=K14454+%23FFFFFF,red%0d%0aK01426+%23FFFFFF,green%0d%0aK00128+%23FFFFFF,green%0d%0aK01485+%23FFFFFF,green%0d%0aK00819+%23FFFFFF,red%0d%0aK01259+%23FFFFFF,red%0d%0a
ko03008	Ribosome biogenesis in eukaryotes	Genetic Information Processing	Translation	15	5	20	70	0.873573	0.999866	TRINITY_DN946_c2_g1,TRINITY_DN367_c0_g1,TRINITY_DN1735_c0_g1,TRINITY_DN419_c4_g1,TRINITY_DN1697_c0_g1,TRINITY_DN1840_c0_g1,TRINITY_DN577_c0_g1,TRINITY_DN2352_c0_g1,TRINITY_DN11688_c0_g1,TRINITY_DN5844_c0_g1,TRINITY_DN5075_c0_g1,TRINITY_DN12774_c0_g1,TRINITY_DN3451_c0_g1,TRINITY_DN4624_c0_g1,TRINITY_DN368_c3_g1	TRINITY_DN16_c4_g1,TRINITY_DN1826_c0_g1,TRINITY_DN3165_c1_g1,TRINITY_DN412_c3_g1,TRINITY_DN2443_c0_g1	http://www.kegg.jp/kegg-bin/show_pathway?map=map03008&multi_query=K14559+%23FFFFFF,red%0d%0aK14284+%23FFFFFF,red%0d%0aK14549+%23FFFFFF,red%0d%0aK14285+%23FFFFFF,green%0d%0aK14569+%23FFFFFF,red%0d%0aK13288+%23FFFFFF,green%0d%0aK14539+%23FFFFFF,red%0d%0aK11129+%23FFFFFF,green%0d%0aK07562+%23FFFFFF,red%0d%0aK14572+%23FFFFFF,red%0d%0aK14563+%23FFFFFF,red%0d%0aK14570+%23FFFFFF,red%0d%0aK14550+%23FFFFF…
ko04120	Ubiquitin mediated proteolysis	Genetic Information Processing	Folding, sorting and degradation	16	3	19	67	0.877322	0.999866	TRINITY_DN2373_c1_g1,TRINITY_DN5595_c0_g1,TRINITY_DN4416_c0_g1,TRINITY_DN10548_c0_g1,TRINITY_DN3529_c0_g1,TRINITY_DN281_c0_g1,TRINITY_DN557_c0_g1,TRINITY_DN403_c0_g1,TRINITY_DN5901_c0_g1,TRINITY_DN5901_c0_g2,TRINITY_DN2467_c0_g1,TRINITY_DN3412_c0_g2,TRINITY_DN7537_c0_g1,TRINITY_DN281_c0_g2,TRINITY_DN604_c0_g1,TRINITY_DN8199_c0_g1	TRINITY_DN2000_c0_g1,TRINITY_DN2574_c1_g1,TRINITY_DN519_c4_g1	http://www.kegg.jp/kegg-bin/show_pathway?map=map04120&multi_query=K10601+%23FFFFFF,green%0d%0aK03363+%23FFFFFF,green%0d%0aK03178+%23FFFFFF,red%0d%0aK10575+%23FFFFFF,red%0d%0aK03347+%23FFFFFF,red%0d%0aK10578+%23FFFFFF,green%0d%0aK03094+%23FFFFFF,red%0d%0aK10582+%23FFFFFF,red%0d%0aK08770+%23FFFFFF,red%0d%0aK10592+%23FFFFFF,red%0d%0aK03364+%23FFFFFF,red%0d%0aK10581+%23FFFFFF,red%0d%0aK03352+%23FFFFF…
ko00460	Cyanoamino acid metabolism	Metabolism	Metabolism of other amino acids	1	5	6	24	0.881793	0.999866	TRINITY_DN8787_c0_g1	TRINITY_DN1091_c1_g1,TRINITY_DN3553_c0_g1,TRINITY_DN3735_c0_g1,TRINITY_DN3156_c0_g1,TRINITY_DN1884_c1_g1	http://www.kegg.jp/kegg-bin/show_pathway?map=map00460&multi_query=K00681+%23FFFFFF,green%0d%0aK10675+%23FFFFFF,green%0d%0aK05349+%23FFFFFF,purple%0d%0aK01455+%23FFFFFF,green%0d%0aK00600+%23FFFFFF,green%0d%0a
ko00340	Histidine metabolism	Metabolism	Amino acid metabolism	2	2	4	17	0.885698	0.999866	TRINITY_DN1229_c0_g1,TRINITY_DN13501_c0_g1	TRINITY_DN1377_c0_g1,TRINITY_DN2233_c1_g1	http://www.kegg.jp/kegg-bin/show_pathway?map=map00340&multi_query=K01814+%23FFFFFF,green%0d%0aK19787+%23FFFFFF,red%0d%0aK01663+%23FFFFFF,red%0d%0aK00128+%23FFFFFF,green%0d%0a
ko04139	Mitophagy - yeast	Cellular Processes	Transport and catabolism	9	0	9	35	0.896333	0.999866	TRINITY_DN5986_c0_g1,TRINITY_DN677_c1_g2,TRINITY_DN593_c2_g1,TRINITY_DN4669_c0_g1,TRINITY_DN9093_c0_g1,TRINITY_DN3188_c0_g1,TRINITY_DN13027_c0_g1,TRINITY_DN522_c1_g1,TRINITY_DN1157_c0_g1	-	http://www.kegg.jp/kegg-bin/show_pathway?map=map04139&multi_query=K11227+%23FFFFFF,red%0d%0aK11644+%23FFFFFF,red%0d%0aK17065+%23FFFFFF,red%0d%0aK11233+%23FFFFFF,red%0d%0aK08341+%23FFFFFF,red%0d%0aK11229+%23FFFFFF,red%0d%0a
ko03015	mRNA surveillance pathway	Genetic Information Processing	Translation	12	2	14	52	0.899784	0.999866	TRINITY_DN1308_c1_g1,TRINITY_DN4189_c0_g1,TRINITY_DN588_c0_g1,TRINITY_DN870_c1_g1,TRINITY_DN367_c0_g1,TRINITY_DN1596_c0_g1,TRINITY_DN1334_c0_g1,TRINITY_DN12339_c0_g1,TRINITY_DN3638_c0_g1,TRINITY_DN2300_c2_g1,TRINITY_DN1570_c0_g1,TRINITY_DN5430_c0_g1	TRINITY_DN412_c3_g1,TRINITY_DN1931_c0_g1	http://www.kegg.jp/kegg-bin/show_pathway?map=map03015&multi_query=K14401+%23FFFFFF,red%0d%0aK14326+%23FFFFFF,red%0d%0aK14284+%23FFFFFF,red%0d%0aK06269+%23FFFFFF,red%0d%0aK14408+%23FFFFFF,red%0d%0aK14328+%23FFFFFF,green%0d%0aK06100+%23FFFFFF,red%0d%0aK14285+%23FFFFFF,green%0d%0aK18723+%23FFFFFF,red%0d%0aK14416+%23FFFFFF,red%0d%0aK14376+%23FFFFFF,red%0d%0aK14400+%23FFFFFF,red%0d%0a
ko00670	One carbon pool by folate	Metabolism	Metabolism of cofactors and vitamins	0	2	2	10	0.906344	0.999866	-	TRINITY_DN3343_c0_g1,TRINITY_DN3735_c0_g1	http://www.kegg.jp/kegg-bin/show_pathway?map=map00670&multi_query=K00600+%23FFFFFF,green%0d%0aK00295+%23FFFFFF,green%0d%0a
ko00061	Fatty acid biosynthesis	Metabolism	Lipid metabolism	2	1	3	14	0.907141	0.999866	TRINITY_DN553_c0_g2,TRINITY_DN784_c1_g1	TRINITY_DN9154_c0_g1	http://www.kegg.jp/kegg-bin/show_pathway?map=map00061&multi_query=K00059+%23FFFFFF,green%0d%0aK01897+%23FFFFFF,red%0d%0a
ko00604	Glycosphingolipid biosynthesis - ganglio series	Metabolism	Glycan biosynthesis and metabolism	0	1	1	6	0.919212	0.999866	-	TRINITY_DN3317_c1_g1	http://www.kegg.jp/kegg-bin/show_pathway?map=map00604&multi_query=K12373+%23FFFFFF,green%0d%0a
ko03420	Nucleotide excision repair	Genetic Information Processing	Replication and repair	8	2	10	40	0.92353	0.999866	TRINITY_DN2076_c1_g1,TRINITY_DN3712_c0_g1,TRINITY_DN10059_c0_g1,TRINITY_DN2636_c0_g1,TRINITY_DN1608_c0_g1,TRINITY_DN1087_c0_g1,TRINITY_DN60_c13_g1,TRINITY_DN2576_c1_g1	TRINITY_DN466_c1_g1,TRINITY_DN536_c12_g1	http://www.kegg.jp/kegg-bin/show_pathway?map=map03420&multi_query=K10839+%23FFFFFF,green%0d%0aK10756+%23FFFFFF,red%0d%0aK10844+%23FFFFFF,red%0d%0aK10849+%23FFFFFF,red%0d%0aK10846+%23FFFFFF,red%0d%0aK10754+%23FFFFFF,red%0d%0aK02324+%23FFFFFF,red%0d%0aK02325+%23FFFFFF,red%0d%0aK02327+%23FFFFFF,red%0d%0a
ko00062	Fatty acid elongation	Metabolism	Lipid metabolism	0	3	3	15	0.931049	0.999866	-	TRINITY_DN3272_c0_g2,TRINITY_DN2549_c0_g1,TRINITY_DN10605_c0_g1	http://www.kegg.jp/kegg-bin/show_pathway?map=map00062&multi_query=K10251+%23FFFFFF,green%0d%0a
ko00511	Other glycan degradation	Metabolism	Glycan biosynthesis and metabolism	0	3	3	15	0.931049	0.999866	-	TRINITY_DN5051_c0_g1,TRINITY_DN3861_c1_g1,TRINITY_DN3317_c1_g1	http://www.kegg.jp/kegg-bin/show_pathway?map=map00511&multi_query=K12373+%23FFFFFF,green%0d%0aK01206+%23FFFFFF,green%0d%0aK01192+%23FFFFFF,green%0d%0a
ko00280	Valine, leucine and isoleucine degradation	Metabolism	Amino acid metabolism	1	6	7	31	0.945696	0.999866	TRINITY_DN5972_c0_g1	TRINITY_DN228_c5_g1,TRINITY_DN14625_c0_g1,TRINITY_DN1665_c0_g1,TRINITY_DN2233_c1_g1,TRINITY_DN1625_c0_g1,TRINITY_DN672_c0_g1	http://www.kegg.jp/kegg-bin/show_pathway?map=map00280&multi_query=K00626+%23FFFFFF,green%0d%0aK01641+%23FFFFFF,purple%0d%0aK00382+%23FFFFFF,green%0d%0aK07513+%23FFFFFF,green%0d%0aK01907+%23FFFFFF,green%0d%0aK00128+%23FFFFFF,green%0d%0a
ko00563	Glycosylphosphatidylinositol (GPI)-anchor biosynthesis	Metabolism	Glycan biosynthesis and metabolism	1	2	3	16	0.94917	0.999866	TRINITY_DN729_c2_g2	TRINITY_DN2436_c1_g1,TRINITY_DN2085_c0_g1	http://www.kegg.jp/kegg-bin/show_pathway?map=map00563&multi_query=K09658+%23FFFFFF,green%0d%0aK05283+%23FFFFFF,green%0d%0aK03860+%23FFFFFF,red%0d%0a
ko04130	SNARE interactions in vesicular transport	Genetic Information Processing	Folding, sorting and degradation	2	2	4	20	0.9493	0.999866	TRINITY_DN9182_c0_g2,TRINITY_DN528_c0_g2	TRINITY_DN36_c0_g1,TRINITY_DN1075_c1_g1	http://www.kegg.jp/kegg-bin/show_pathway?map=map04130&multi_query=K08502+%23FFFFFF,green%0d%0aK08486+%23FFFFFF,purple%0d%0a
ko00500	Starch and sucrose metabolism	Metabolism	Carbohydrate metabolism	11	11	22	83	0.950473	0.999866	TRINITY_DN324_c4_g1,TRINITY_DN5977_c0_g1,TRINITY_DN1147_c2_g1,TRINITY_DN12060_c0_g1,TRINITY_DN3778_c0_g1,TRINITY_DN8787_c0_g1,TRINITY_DN7624_c0_g1,TRINITY_DN7922_c0_g1,TRINITY_DN2588_c0_g1,TRINITY_DN489_c2_g1,TRINITY_DN7343_c0_g1	TRINITY_DN188_c0_g2,TRINITY_DN1147_c1_g1,TRINITY_DN973_c2_g1,TRINITY_DN159_c2_g1,TRINITY_DN351_c5_g1,TRINITY_DN3039_c1_g1,TRINITY_DN729_c10_g1,TRINITY_DN5949_c1_g1,TRINITY_DN2595_c0_g1,TRINITY_DN2551_c0_g1,TRINITY_DN1091_c1_g1	http://www.kegg.jp/kegg-bin/show_pathway?map=map00500&multi_query=K00688+%23FFFFFF,green%0d%0aK01835+%23FFFFFF,green%0d%0aK00706+%23FFFFFF,red%0d%0aK00697+%23FFFFFF,green%0d%0aK00693+%23FFFFFF,green%0d%0aK01225+%23FFFFFF,red%0d%0aK01187+%23FFFFFF,purple%0d%0aK01810+%23FFFFFF,green%0d%0aK00844+%23FFFFFF,green%0d%0aK01176+%23FFFFFF,red%0d%0aK01193+%23FFFFFF,red%0d%0aK00963+%23FFFFFF,purple%0d%0aK01…
ko00410	beta-Alanine metabolism	Metabolism	Metabolism of other amino acids	3	4	7	32	0.957064	0.999866	TRINITY_DN10339_c0_g1,TRINITY_DN978_c0_g1,TRINITY_DN215_c1_g1	TRINITY_DN1753_c1_g1,TRINITY_DN2233_c1_g1,TRINITY_DN2002_c1_g1,TRINITY_DN462_c0_g1	http://www.kegg.jp/kegg-bin/show_pathway?map=map00410&multi_query=K01580+%23FFFFFF,green%0d%0aK14729+%23FFFFFF,red%0d%0aK00823+%23FFFFFF,green%0d%0aK00128+%23FFFFFF,green%0d%0aK00276+%23FFFFFF,purple%0d%0a
ko00531	Glycosaminoglycan degradation	Metabolism	Glycan biosynthesis and metabolism	0	1	1	8	0.965142	0.999866	-	TRINITY_DN3317_c1_g1	http://www.kegg.jp/kegg-bin/show_pathway?map=map00531&multi_query=K12373+%23FFFFFF,green%0d%0a
ko04136	Autophagy - other	Cellular Processes	Transport and catabolism	3	3	6	30	0.972328	0.999866	TRINITY_DN5986_c0_g1,TRINITY_DN1021_c0_g1,TRINITY_DN1157_c0_g1	TRINITY_DN133_c5_g1,TRINITY_DN430_c1_g1,TRINITY_DN775_c0_g2	http://www.kegg.jp/kegg-bin/show_pathway?map=map04136&multi_query=K08337+%23FFFFFF,red%0d%0aK08336+%23FFFFFF,green%0d%0aK08339+%23FFFFFF,green%0d%0aK08334+%23FFFFFF,green%0d%0aK08341+%23FFFFFF,red%0d%0a
ko02010	ABC transporters	Environmental Information Processing	Membrane transport	1	0	1	9	0.977111	0.999866	TRINITY_DN426_c0_g1	-	http://www.kegg.jp/kegg-bin/show_pathway?map=map02010&multi_query=K15628+%23FFFFFF,red%0d%0a
ko00785	Lipoic acid metabolism	Metabolism	Metabolism of cofactors and vitamins	0	1	1	9	0.977111	0.999866	-	TRINITY_DN6310_c0_g1	http://www.kegg.jp/kegg-bin/show_pathway?map=map00785&multi_query=K03800+%23FFFFFF,green%0d%0a
ko03430	Mismatch repair	Genetic Information Processing	Replication and repair	5	0	5	27	0.978408	0.999866	TRINITY_DN278_c4_g1,TRINITY_DN60_c13_g1,TRINITY_DN200_c1_g1,TRINITY_DN3712_c0_g1,TRINITY_DN1087_c0_g1	-	http://www.kegg.jp/kegg-bin/show_pathway?map=map03430&multi_query=K08734+%23FFFFFF,red%0d%0aK02327+%23FFFFFF,red%0d%0aK08736+%23FFFFFF,red%0d%0aK10756+%23FFFFFF,red%0d%0aK10754+%23FFFFFF,red%0d%0a
ko00640	Propanoate metabolism	Metabolism	Carbohydrate metabolism	1	5	6	32	0.983717	0.999866	TRINITY_DN215_c1_g1	TRINITY_DN1665_c0_g1,TRINITY_DN1753_c1_g1,TRINITY_DN2677_c0_g2,TRINITY_DN798_c2_g1,TRINITY_DN173_c0_g1	http://www.kegg.jp/kegg-bin/show_pathway?map=map00640&multi_query=K00925+%23FFFFFF,green%0d%0aK00382+%23FFFFFF,green%0d%0aK01900+%23FFFFFF,green%0d%0aK01899+%23FFFFFF,green%0d%0aK14729+%23FFFFFF,red%0d%0aK00823+%23FFFFFF,green%0d%0a
ko00760	Nicotinate and nicotinamide metabolism	Metabolism	Metabolism of cofactors and vitamins	2	3	5	28	0.983722	0.999866	TRINITY_DN4153_c0_g1,TRINITY_DN8334_c0_g1	TRINITY_DN1809_c0_g1,TRINITY_DN6459_c0_g1,TRINITY_DN5102_c0_g1	http://www.kegg.jp/kegg-bin/show_pathway?map=map00760&multi_query=K03426+%23FFFFFF,green%0d%0aK00135+%23FFFFFF,red%0d%0aK11121+%23FFFFFF,red%0d%0aK10524+%23FFFFFF,green%0d%0aK11415+%23FFFFFF,green%0d%0a
ko03050	Proteasome	Genetic Information Processing	Folding, sorting and degradation	6	3	9	44	0.985483	0.999866	TRINITY_DN3964_c0_g1,TRINITY_DN6426_c0_g1,TRINITY_DN538_c0_g1,TRINITY_DN5695_c0_g1,TRINITY_DN8090_c0_g1,TRINITY_DN100_c2_g1	TRINITY_DN3456_c0_g1,TRINITY_DN3237_c0_g1,TRINITY_DN40_c3_g1	http://www.kegg.jp/kegg-bin/show_pathway?map=map03050&multi_query=K02732+%23FFFFFF,green%0d%0aK03033+%23FFFFFF,red%0d%0aK03030+%23FFFFFF,green%0d%0aK02725+%23FFFFFF,red%0d%0aK03039+%23FFFFFF,green%0d%0aK03064+%23FFFFFF,red%0d%0aK03061+%23FFFFFF,red%0d%0aK06699+%23FFFFFF,red%0d%0aK03032+%23FFFFFF,red%0d%0a
ko00300	Lysine biosynthesis	Metabolism	Amino acid metabolism	0	2	2	16	0.988742	0.999866	-	TRINITY_DN47_c1_g1,TRINITY_DN1031_c0_g1	http://www.kegg.jp/kegg-bin/show_pathway?map=map00300&multi_query=K05824+%23FFFFFF,green%0d%0aK00838+%23FFFFFF,green%0d%0a
ko04138	Autophagy - yeast	Cellular Processes	Transport and catabolism	10	8	18	82	0.995147	0.999866	TRINITY_DN1063_c0_g1,TRINITY_DN13731_c0_g1,TRINITY_DN740_c2_g1,TRINITY_DN3492_c0_g1,TRINITY_DN1021_c0_g1,TRINITY_DN5986_c0_g1,TRINITY_DN774_c0_g1,TRINITY_DN8503_c0_g1,TRINITY_DN306_c0_g1,TRINITY_DN1157_c0_g1	TRINITY_DN941_c1_g2,TRINITY_DN1075_c1_g1,TRINITY_DN133_c5_g1,TRINITY_DN4841_c0_g1,TRINITY_DN135_c1_g1,TRINITY_DN430_c1_g1,TRINITY_DN2740_c0_g1,TRINITY_DN775_c0_g2	http://www.kegg.jp/kegg-bin/show_pathway?map=map04138&multi_query=K08341+%23FFFFFF,red%0d%0aK08334+%23FFFFFF,green%0d%0aK04345+%23FFFFFF,green%0d%0aK20182+%23FFFFFF,red%0d%0aK20181+%23FFFFFF,purple%0d%0aK12761+%23FFFFFF,red%0d%0aK01336+%23FFFFFF,red%0d%0aK03237+%23FFFFFF,red%0d%0aK08337+%23FFFFFF,red%0d%0aK08339+%23FFFFFF,green%0d%0aK05755+%23FFFFFF,green%0d%0aK00654+%23FFFFFF,green%0d%0aK08502+%…
ko00400	Phenylalanine, tyrosine and tryptophan biosynthesis	Metabolism	Amino acid metabolism	1	2	3	24	0.996335	0.999866	TRINITY_DN5517_c0_g1	TRINITY_DN1031_c0_g1,TRINITY_DN5524_c0_g1	http://www.kegg.jp/kegg-bin/show_pathway?map=map00400&multi_query=K00838+%23FFFFFF,green%0d%0aK14454+%23FFFFFF,red%0d%0aK01626+%23FFFFFF,green%0d%0a
ko00970	Aminoacyl-tRNA biosynthesis	Genetic Information Processing	Translation	3	2	5	37	0.998939	0.999866	TRINITY_DN1617_c0_g1,TRINITY_DN6368_c0_g1,TRINITY_DN6906_c0_g1	TRINITY_DN8637_c0_g1,TRINITY_DN754_c1_g1	http://www.kegg.jp/kegg-bin/show_pathway?map=map00970&multi_query=K04567+%23FFFFFF,red%0d%0aK01867+%23FFFFFF,green%0d%0aK01873+%23FFFFFF,red%0d%0aK01881+%23FFFFFF,red%0d%0aK01889+%23FFFFFF,green%0d%0a
ko04145	Phagosome	Cellular Processes	Transport and catabolism	5	3	8	51	0.999213	0.999866	TRINITY_DN6491_c0_g1,TRINITY_DN1114_c3_g1,TRINITY_DN9632_c0_g2,TRINITY_DN324_c3_g2,TRINITY_DN5443_c0_g1	TRINITY_DN4263_c1_g2,TRINITY_DN93_c1_g1,TRINITY_DN3461_c1_g1	http://www.kegg.jp/kegg-bin/show_pathway?map=map04145&multi_query=K05692+%23FFFFFF,purple%0d%0aK07374+%23FFFFFF,red%0d%0aK10413+%23FFFFFF,red%0d%0aK09481+%23FFFFFF,green%0d%0aK07375+%23FFFFFF,red%0d%0aK10956+%23FFFFFF,green%0d%0a
ko04144	Endocytosis	Cellular Processes	Transport and catabolism	15	4	19	96	0.999499	0.999866	TRINITY_DN216_c3_g2,TRINITY_DN9702_c0_g1,TRINITY_DN7117_c0_g1,TRINITY_DN5149_c0_g1,TRINITY_DN8414_c0_g1,TRINITY_DN2300_c3_g1,TRINITY_DN8199_c0_g1,TRINITY_DN4416_c0_g1,TRINITY_DN959_c0_g1,TRINITY_DN9659_c0_g1,TRINITY_DN3434_c0_g1,TRINITY_DN351_c1_g2,TRINITY_DN8527_c0_g1,TRINITY_DN4065_c0_g1,TRINITY_DN3791_c0_g1	TRINITY_DN2740_c0_g1,TRINITY_DN4525_c0_g1,TRINITY_DN2293_c2_g1,TRINITY_DN4325_c0_g1	http://www.kegg.jp/kegg-bin/show_pathway?map=map04144&multi_query=K10591+%23FFFFFF,red%0d%0aK01115+%23FFFFFF,red%0d%0aK04513+%23FFFFFF,green%0d%0aK03283+%23FFFFFF,purple%0d%0aK19475+%23FFFFFF,red%0d%0aK12486+%23FFFFFF,red%0d%0aK05755+%23FFFFFF,green%0d%0aK12200+%23FFFFFF,red%0d%0aK11826+%23FFFFFF,red%0d%0aK07937+%23FFFFFF,purple%0d%0aK18468+%23FFFFFF,red%0d%0a
ko03018	RNA degradation	Genetic Information Processing	Folding, sorting and degradation	3	3	6	48	0.999866	0.999866	TRINITY_DN12821_c0_g1,TRINITY_DN5568_c0_g1,TRINITY_DN1869_c0_g1	TRINITY_DN729_c10_g2,TRINITY_DN1348_c0_g1,TRINITY_DN111_c8_g1	http://www.kegg.jp/kegg-bin/show_pathway?map=map03018&multi_query=K12580+%23FFFFFF,red%0d%0aK12599+%23FFFFFF,red%0d%0aK01689+%23FFFFFF,green%0d%0aK12611+%23FFFFFF,green%0d%0aK04043+%23FFFFFF,red%0d%0aK12620+%23FFFFFF,green%0d%0a

## Sheet: S5 D1-vs-D6KEGG-enrichment
PathwayID	Pathway	Level1	Level2	Up_number	Down_number	DEG_number	total_number	Pvalue	FDR	Up_gene	Down_gene	URL
ko00190	Oxidative phosphorylation	Metabolism	Energy metabolism	3	35	38	81	2.44373e-09	2.59036e-07	TRINITY_DN8931_c0_g1,TRINITY_DN1180_c1_g1,TRINITY_DN14918_c0_g1	TRINITY_DN1201_c1_g1,TRINITY_DN2925_c0_g1,TRINITY_DN126_c2_g3,TRINITY_DN98_c0_g1,TRINITY_DN245_c0_g2,TRINITY_DN98_c0_g5,TRINITY_DN19_c3_g1,TRINITY_DN70_c8_g1,TRINITY_DN126_c0_g2,TRINITY_DN237_c0_g1,TRINITY_DN3259_c0_g2,TRINITY_DN202_c3_g1,TRINITY_DN5971_c0_g1,TRINITY_DN44_c2_g2,TRINITY_DN70_c4_g1,TRINITY_DN258_c2_g3,TRINITY_DN4_c14_g1,TRINITY_DN3377_c0_g1,TRINITY_DN3905_c0_g1,TRINITY_DN3408_c0_g1…	http://www.kegg.jp/kegg-bin/show_pathway?map=map00190&multi_query=K02127+%23FFFFFF,green%0d%0aK02149+%23FFFFFF,green%0d%0aK03881+%23FFFFFF,green%0d%0aK00234+%23FFFFFF,green%0d%0aK00411+%23FFFFFF,green%0d%0aK02263+%23FFFFFF,green%0d%0aK03940+%23FFFFFF,green%0d%0aK00415+%23FFFFFF,green%0d%0aK00418+%23FFFFFF,green%0d%0aK03938+%23FFFFFF,red%0d%0aK02126+%23FFFFFF,green%0d%0aK00417+%23FFFFFF,green%0d%0…
ko04141	Protein processing in endoplasmic reticulum	Genetic Information Processing	Folding, sorting and degradation	16	30	46	115	2.69742e-08	1.42963e-06	TRINITY_DN2300_c3_g1,TRINITY_DN5595_c0_g1,TRINITY_DN216_c3_g2,TRINITY_DN5824_c0_g1,TRINITY_DN281_c0_g1,TRINITY_DN7433_c0_g2,TRINITY_DN3134_c0_g1,TRINITY_DN351_c1_g2,TRINITY_DN2914_c0_g4,TRINITY_DN89_c0_g1,TRINITY_DN9702_c0_g1,TRINITY_DN5901_c0_g1,TRINITY_DN7117_c0_g1,TRINITY_DN5402_c0_g1,TRINITY_DN1641_c0_g1,TRINITY_DN5901_c0_g2	TRINITY_DN1651_c0_g1,TRINITY_DN320_c3_g1,TRINITY_DN2287_c0_g1,TRINITY_DN216_c1_g1,TRINITY_DN1116_c0_g1,TRINITY_DN3461_c1_g1,TRINITY_DN6419_c0_g1,TRINITY_DN313_c3_g1,TRINITY_DN519_c4_g1,TRINITY_DN1719_c0_g1,TRINITY_DN347_c1_g1,TRINITY_DN973_c4_g1,TRINITY_DN2000_c0_g1,TRINITY_DN3488_c0_g1,TRINITY_DN1081_c1_g1,TRINITY_DN1437_c0_g1,TRINITY_DN996_c1_g1,TRINITY_DN779_c4_g1,TRINITY_DN891_c2_g1,TRINITY_D…	http://www.kegg.jp/kegg-bin/show_pathway?map=map04141&multi_query=K09490+%23FFFFFF,green%0d%0aK05546+%23FFFFFF,green%0d%0aK03347+%23FFFFFF,red%0d%0aK13989+%23FFFFFF,green%0d%0aK01228+%23FFFFFF,green%0d%0aK09487+%23FFFFFF,green%0d%0aK13993+%23FFFFFF,red%0d%0aK12670+%23FFFFFF,green%0d%0aK08054+%23FFFFFF,green%0d%0aK10956+%23FFFFFF,green%0d%0aK12666+%23FFFFFF,green%0d%0aK14006+%23FFFFFF,green%0d%0aK…
ko00510	N-Glycan biosynthesis	Metabolism	Glycan biosynthesis and metabolism	2	14	16	41	0.00158192	0.0558945	TRINITY_DN1734_c0_g3,TRINITY_DN1099_c0_g1	TRINITY_DN973_c4_g1,TRINITY_DN4028_c0_g2,TRINITY_DN1889_c0_g1,TRINITY_DN996_c1_g1,TRINITY_DN1719_c0_g1,TRINITY_DN779_c4_g1,TRINITY_DN1770_c2_g1,TRINITY_DN6419_c0_g1,TRINITY_DN1081_c1_g1,TRINITY_DN2287_c0_g1,TRINITY_DN313_c3_g1,TRINITY_DN1651_c0_g1,TRINITY_DN2436_c1_g1,TRINITY_DN7252_c0_g1	http://www.kegg.jp/kegg-bin/show_pathway?map=map00510&multi_query=K05546+%23FFFFFF,green%0d%0aK12669+%23FFFFFF,green%0d%0aK00721+%23FFFFFF,green%0d%0aK03842+%23FFFFFF,red%0d%0aK12667+%23FFFFFF,green%0d%0aK07151+%23FFFFFF,green%0d%0aK12666+%23FFFFFF,green%0d%0aK07252+%23FFFFFF,red%0d%0aK09658+%23FFFFFF,green%0d%0aK12670+%23FFFFFF,green%0d%0aK01230+%23FFFFFF,green%0d%0aK01228+%23FFFFFF,green%0d%0aK…
ko00430	Taurine and hypotaurine metabolism	Metabolism	Metabolism of other amino acids	0	4	4	5	0.00497512	0.131841	-	TRINITY_DN1061_c3_g1,TRINITY_DN462_c0_g1,TRINITY_DN3156_c0_g1,TRINITY_DN173_c0_g1	http://www.kegg.jp/kegg-bin/show_pathway?map=map00430&multi_query=K00681+%23FFFFFF,green%0d%0aK00925+%23FFFFFF,green%0d%0aK18592+%23FFFFFF,green%0d%0aK01580+%23FFFFFF,green%0d%0a
ko00513	Various types of N-glycan biosynthesis	Metabolism	Glycan biosynthesis and metabolism	1	11	12	35	0.0189557	0.40186	TRINITY_DN1099_c0_g1	TRINITY_DN2287_c0_g1,TRINITY_DN1651_c0_g1,TRINITY_DN6419_c0_g1,TRINITY_DN973_c4_g1,TRINITY_DN6129_c0_g2,TRINITY_DN1719_c0_g1,TRINITY_DN1081_c1_g1,TRINITY_DN779_c4_g1,TRINITY_DN1770_c2_g1,TRINITY_DN7252_c0_g1,TRINITY_DN1889_c0_g1	http://www.kegg.jp/kegg-bin/show_pathway?map=map00513&multi_query=K03842+%23FFFFFF,red%0d%0aK12667+%23FFFFFF,green%0d%0aK12669+%23FFFFFF,green%0d%0aK07151+%23FFFFFF,green%0d%0aK12373+%23FFFFFF,green%0d%0aK12666+%23FFFFFF,green%0d%0aK01230+%23FFFFFF,green%0d%0aK12668+%23FFFFFF,green%0d%0aK12670+%23FFFFFF,green%0d%0a
ko00051	Fructose and mannose metabolism	Metabolism	Carbohydrate metabolism	1	8	9	25	0.0293199	0.517984	TRINITY_DN234_c0_g1	TRINITY_DN2042_c1_g1,TRINITY_DN1579_c0_g1,TRINITY_DN7422_c0_g1,TRINITY_DN101_c5_g1,TRINITY_DN5457_c0_g2,TRINITY_DN1332_c1_g2,TRINITY_DN1455_c0_g1,TRINITY_DN1876_c0_g1	http://www.kegg.jp/kegg-bin/show_pathway?map=map00051&multi_query=K00863+%23FFFFFF,green%0d%0aK19355+%23FFFFFF,purple%0d%0aK19030+%23FFFFFF,green%0d%0aK01711+%23FFFFFF,green%0d%0aK01624+%23FFFFFF,green%0d%0aK03841+%23FFFFFF,green%0d%0aK00008+%23FFFFFF,green%0d%0aK18337+%23FFFFFF,green%0d%0a
ko00590	Arachidonic acid metabolism	Metabolism	Lipid metabolism	2	4	6	15	0.0434737	0.658317	TRINITY_DN4897_c0_g1,TRINITY_DN43_c1_g1	TRINITY_DN449_c2_g1,TRINITY_DN13922_c0_g1,TRINITY_DN1061_c3_g1,TRINITY_DN2594_c0_g1	http://www.kegg.jp/kegg-bin/show_pathway?map=map00590&multi_query=K00079+%23FFFFFF,green%0d%0aK18592+%23FFFFFF,green%0d%0aK04097+%23FFFFFF,green%0d%0aK14621+%23FFFFFF,red%0d%0a
ko00130	Ubiquinone and other terpenoid-quinone biosynthesis	Metabolism	Metabolism of cofactors and vitamins	2	4	6	16	0.0590396	0.712316	TRINITY_DN4788_c0_g2,TRINITY_DN200_c0_g1	TRINITY_DN2530_c1_g1,TRINITY_DN2877_c0_g1,TRINITY_DN686_c0_g1,TRINITY_DN78_c2_g1	http://www.kegg.jp/kegg-bin/show_pathway?map=map00130&multi_query=K00838+%23FFFFFF,green%0d%0aK03809+%23FFFFFF,purple%0d%0aK06125+%23FFFFFF,purple%0d%0aK06126+%23FFFFFF,green%0d%0a
ko03060	Protein export	Genetic Information Processing	Folding, sorting and degradation	0	8	8	24	0.0604797	0.712316	-	TRINITY_DN4263_c1_g2,TRINITY_DN1947_c0_g1,TRINITY_DN3328_c0_g1,TRINITY_DN3461_c1_g1,TRINITY_DN320_c3_g1,TRINITY_DN216_c1_g1,TRINITY_DN897_c2_g1,TRINITY_DN1316_c0_g1	http://www.kegg.jp/kegg-bin/show_pathway?map=map03060&multi_query=K09490+%23FFFFFF,green%0d%0aK12947+%23FFFFFF,green%0d%0aK10956+%23FFFFFF,green%0d%0aK13280+%23FFFFFF,green%0d%0aK03104+%23FFFFFF,green%0d%0aK09481+%23FFFFFF,green%0d%0a
ko00680	Methane metabolism	Metabolism	Energy metabolism	2	6	8	25	0.0751431	0.793856	TRINITY_DN3006_c0_g1,TRINITY_DN1283_c0_g1	TRINITY_DN3281_c0_g1,TRINITY_DN2042_c1_g1,TRINITY_DN101_c5_g1,TRINITY_DN1348_c0_g1,TRINITY_DN1579_c0_g1,TRINITY_DN173_c0_g1	http://www.kegg.jp/kegg-bin/show_pathway?map=map00680&multi_query=K03841+%23FFFFFF,green%0d%0aK17066+%23FFFFFF,red%0d%0aK01624+%23FFFFFF,green%0d%0aK01689+%23FFFFFF,green%0d%0aK00121+%23FFFFFF,red%0d%0aK00863+%23FFFFFF,green%0d%0aK01895+%23FFFFFF,green%0d%0aK00925+%23FFFFFF,green%0d%0a
ko00040	Pentose and glucuronate interconversions	Metabolism	Carbohydrate metabolism	4	5	9	30	0.0872317	0.793856	TRINITY_DN7343_c0_g1,TRINITY_DN4652_c1_g1,TRINITY_DN495_c0_g1,TRINITY_DN5977_c0_g1	TRINITY_DN1195_c0_g1,TRINITY_DN285_c0_g1,TRINITY_DN5457_c0_g2,TRINITY_DN10835_c0_g1,TRINITY_DN4112_c0_g1	http://www.kegg.jp/kegg-bin/show_pathway?map=map00040&multi_query=K00963+%23FFFFFF,purple%0d%0aK17743+%23FFFFFF,green%0d%0aK00008+%23FFFFFF,green%0d%0aK01728+%23FFFFFF,red%0d%0aK17818+%23FFFFFF,green%0d%0aK01051+%23FFFFFF,purple%0d%0a
ko00561	Glycerolipid metabolism	Metabolism	Lipid metabolism	3	5	8	26	0.0917653	0.793856	TRINITY_DN248_c3_g1,TRINITY_DN456_c0_g1,TRINITY_DN2792_c0_g1	TRINITY_DN2042_c1_g1,TRINITY_DN14827_c0_g1,TRINITY_DN413_c1_g1,TRINITY_DN2547_c0_g1,TRINITY_DN3845_c0_g1	http://www.kegg.jp/kegg-bin/show_pathway?map=map00561&multi_query=K14085+%23FFFFFF,red%0d%0aK13509+%23FFFFFF,red%0d%0aK00863+%23FFFFFF,green%0d%0aK18097+%23FFFFFF,green%0d%0aK15918+%23FFFFFF,green%0d%0aK01054+%23FFFFFF,red%0d%0a
ko00480	Glutathione metabolism	Metabolism	Metabolism of other amino acids	0	10	10	35	0.0973597	0.793856	-	TRINITY_DN3043_c0_g1,TRINITY_DN2899_c0_g1,TRINITY_DN4478_c0_g1,TRINITY_DN1302_c0_g1,TRINITY_DN13922_c0_g1,TRINITY_DN1061_c3_g1,TRINITY_DN449_c2_g1,TRINITY_DN9346_c0_g1,TRINITY_DN116_c1_g1,TRINITY_DN3156_c0_g1	http://www.kegg.jp/kegg-bin/show_pathway?map=map00480&multi_query=K00383+%23FFFFFF,green%0d%0aK04097+%23FFFFFF,green%0d%0aK10808+%23FFFFFF,green%0d%0aK00799+%23FFFFFF,green%0d%0aK00033+%23FFFFFF,green%0d%0aK00681+%23FFFFFF,green%0d%0aK18592+%23FFFFFF,green%0d%0a
ko04011	MAPK signaling pathway - yeast	Environmental Information Processing	Signal transduction	17	3	20	82	0.108792	0.823708	TRINITY_DN284_c0_g2,TRINITY_DN4669_c0_g1,TRINITY_DN277_c1_g1,TRINITY_DN1145_c1_g1,TRINITY_DN1763_c0_g1,TRINITY_DN2258_c0_g1,TRINITY_DN875_c1_g1,TRINITY_DN2880_c0_g1,TRINITY_DN622_c2_g1,TRINITY_DN396_c0_g1,TRINITY_DN597_c4_g3,TRINITY_DN284_c0_g1,TRINITY_DN124_c4_g1,TRINITY_DN13990_c0_g1,TRINITY_DN577_c1_g1,TRINITY_DN8199_c0_g1,TRINITY_DN593_c2_g1	TRINITY_DN1132_c0_g1,TRINITY_DN3053_c1_g1,TRINITY_DN5256_c0_g1	http://www.kegg.jp/kegg-bin/show_pathway?map=map04011&multi_query=K19842+%23FFFFFF,red%0d%0aK04627+%23FFFFFF,purple%0d%0aK19844+%23FFFFFF,red%0d%0aK12412+%23FFFFFF,red%0d%0aK11227+%23FFFFFF,red%0d%0aK19806+%23FFFFFF,red%0d%0aK11233+%23FFFFFF,red%0d%0aK03781+%23FFFFFF,purple%0d%0aK10591+%23FFFFFF,red%0d%0aK04513+%23FFFFFF,red%0d%0aK06630+%23FFFFFF,green%0d%0a
ko00030	Pentose phosphate pathway	Metabolism	Carbohydrate metabolism	0	6	6	20	0.149705	0.997837	-	TRINITY_DN101_c5_g1,TRINITY_DN173_c4_g1,TRINITY_DN1579_c0_g1,TRINITY_DN1302_c0_g1,TRINITY_DN4839_c0_g1,TRINITY_DN2339_c0_g1	http://www.kegg.jp/kegg-bin/show_pathway?map=map00030&multi_query=K00033+%23FFFFFF,green%0d%0aK00616+%23FFFFFF,green%0d%0aK01624+%23FFFFFF,green%0d%0aK03841+%23FFFFFF,green%0d%0aK01621+%23FFFFFF,green%0d%0a
ko00780	Biotin metabolism	Metabolism	Metabolism of cofactors and vitamins	0	2	2	4	0.158608	0.997837	-	TRINITY_DN9154_c0_g1,TRINITY_DN2918_c1_g1	http://www.kegg.jp/kegg-bin/show_pathway?map=map00780&multi_query=K01942+%23FFFFFF,green%0d%0aK00059+%23FFFFFF,green%0d%0a
ko04120	Ubiquitin mediated proteolysis	Genetic Information Processing	Folding, sorting and degradation	14	2	16	67	0.162105	0.997837	TRINITY_DN3529_c0_g1,TRINITY_DN3412_c0_g2,TRINITY_DN281_c0_g1,TRINITY_DN8199_c0_g1,TRINITY_DN284_c0_g1,TRINITY_DN1569_c0_g1,TRINITY_DN2880_c0_g1,TRINITY_DN557_c0_g1,TRINITY_DN5901_c0_g2,TRINITY_DN875_c1_g1,TRINITY_DN5595_c0_g1,TRINITY_DN5901_c0_g1,TRINITY_DN284_c0_g2,TRINITY_DN2373_c1_g1	TRINITY_DN2000_c0_g1,TRINITY_DN519_c4_g1	http://www.kegg.jp/kegg-bin/show_pathway?map=map04120&multi_query=K10591+%23FFFFFF,red%0d%0aK03094+%23FFFFFF,red%0d%0aK08770+%23FFFFFF,red%0d%0aK03364+%23FFFFFF,red%0d%0aK03178+%23FFFFFF,red%0d%0aK10601+%23FFFFFF,green%0d%0aK10575+%23FFFFFF,red%0d%0aK10578+%23FFFFFF,green%0d%0aK03347+%23FFFFFF,red%0d%0aK03352+%23FFFFFF,red%0d%0aK10590+%23FFFFFF,red%0d%0a
ko04213	Longevity regulating pathway - multiple species	Organismal Systems	Aging	9	3	12	49	0.182237	0.997837	TRINITY_DN415_c1_g2,TRINITY_DN97_c6_g1,TRINITY_DN216_c3_g2,TRINITY_DN577_c1_g1,TRINITY_DN2300_c3_g1,TRINITY_DN7117_c0_g1,TRINITY_DN9702_c0_g1,TRINITY_DN1617_c0_g2,TRINITY_DN351_c1_g2	TRINITY_DN133_c5_g1,TRINITY_DN3053_c1_g1,TRINITY_DN4263_c1_g1	http://www.kegg.jp/kegg-bin/show_pathway?map=map04213&multi_query=K03695+%23FFFFFF,red%0d%0aK11121+%23FFFFFF,red%0d%0aK03781+%23FFFFFF,purple%0d%0aK08339+%23FFFFFF,green%0d%0aK04565+%23FFFFFF,green%0d%0aK03283+%23FFFFFF,red%0d%0a
ko00900	Terpenoid backbone biosynthesis	Metabolism	Metabolism of terpenoids and polyketides	2	3	5	17	0.193252	0.997837	TRINITY_DN2354_c1_g1,TRINITY_DN228_c5_g1	TRINITY_DN217_c3_g1,TRINITY_DN78_c1_g1,TRINITY_DN6175_c0_g1	http://www.kegg.jp/kegg-bin/show_pathway?map=map00900&multi_query=K08658+%23FFFFFF,red%0d%0aK00021+%23FFFFFF,green%0d%0aK01597+%23FFFFFF,green%0d%0aK01641+%23FFFFFF,red%0d%0a
ko00520	Amino sugar and nucleotide sugar metabolism	Metabolism	Carbohydrate metabolism	14	6	20	90	0.214547	0.997837	TRINITY_DN15221_c0_g1,TRINITY_DN6618_c0_g1,TRINITY_DN273_c6_g1,TRINITY_DN273_c4_g1,TRINITY_DN4836_c0_g1,TRINITY_DN316_c2_g2,TRINITY_DN7343_c0_g1,TRINITY_DN5977_c0_g1,TRINITY_DN4357_c0_g1,TRINITY_DN6969_c0_g1,TRINITY_DN1478_c0_g2,TRINITY_DN408_c0_g1,TRINITY_DN861_c0_g2,TRINITY_DN101_c6_g1	TRINITY_DN1332_c1_g2,TRINITY_DN61_c2_g1,TRINITY_DN6129_c0_g2,TRINITY_DN1878_c0_g1,TRINITY_DN4112_c0_g1,TRINITY_DN1412_c0_g1	http://www.kegg.jp/kegg-bin/show_pathway?map=map00520&multi_query=K08678+%23FFFFFF,green%0d%0aK01209+%23FFFFFF,red%0d%0aK00963+%23FFFFFF,purple%0d%0aK12373+%23FFFFFF,green%0d%0aK00820+%23FFFFFF,red%0d%0aK00972+%23FFFFFF,red%0d%0aK01711+%23FFFFFF,green%0d%0aK00698+%23FFFFFF,red%0d%0aK01183+%23FFFFFF,purple%0d%0aK00326+%23FFFFFF,green%0d%0a
ko00562	Inositol phosphate metabolism	Metabolism	Carbohydrate metabolism	4	3	7	27	0.221192	0.997837	TRINITY_DN2110_c0_g1,TRINITY_DN171_c1_g1,TRINITY_DN217_c18_g1,TRINITY_DN1404_c1_g1	TRINITY_DN2435_c0_g1,TRINITY_DN2930_c0_g1,TRINITY_DN2165_c0_g2	http://www.kegg.jp/kegg-bin/show_pathway?map=map00562&multi_query=K20279+%23FFFFFF,red%0d%0aK01771+%23FFFFFF,red%0d%0aK01092+%23FFFFFF,green%0d%0aK05857+%23FFFFFF,red%0d%0aK01858+%23FFFFFF,red%0d%0aK00469+%23FFFFFF,green%0d%0aK01099+%23FFFFFF,green%0d%0a
ko00240	Pyrimidine metabolism	Metabolism	Nucleotide metabolism	2	6	8	32	0.229224	0.997837	TRINITY_DN2773_c0_g1,TRINITY_DN2750_c1_g1	TRINITY_DN193_c2_g1,TRINITY_DN813_c2_g3,TRINITY_DN3043_c0_g1,TRINITY_DN3299_c0_g2,TRINITY_DN2188_c0_g1,TRINITY_DN544_c2_g2	http://www.kegg.jp/kegg-bin/show_pathway?map=map00240&multi_query=K01489+%23FFFFFF,green%0d%0aK01956+%23FFFFFF,red%0d%0aK00940+%23FFFFFF,green%0d%0aK10808+%23FFFFFF,green%0d%0aK01591+%23FFFFFF,green%0d%0aK01465+%23FFFFFF,green%0d%0aK01485+%23FFFFFF,green%0d%0aK01955+%23FFFFFF,red%0d%0a
ko00514	Other types of O-glycan biosynthesis	Metabolism	Glycan biosynthesis and metabolism	0	2	2	5	0.232945	0.997837	-	TRINITY_DN1969_c1_g1,TRINITY_DN2426_c0_g1	http://www.kegg.jp/kegg-bin/show_pathway?map=map00514&multi_query=K00728+%23FFFFFF,green%0d%0aK10967+%23FFFFFF,green%0d%0a
ko00591	Linoleic acid metabolism	Metabolism	Lipid metabolism	2	0	2	5	0.232945	0.997837	TRINITY_DN43_c1_g1,TRINITY_DN4897_c0_g1	-	http://www.kegg.jp/kegg-bin/show_pathway?map=map00591&multi_query=K14621+%23FFFFFF,red%0d%0a
ko01040	Biosynthesis of unsaturated fatty acids	Metabolism	Lipid metabolism	2	5	7	28	0.25133	0.997837	TRINITY_DN1267_c7_g1,TRINITY_DN940_c0_g1	TRINITY_DN3139_c0_g2,TRINITY_DN3272_c0_g2,TRINITY_DN10605_c0_g1,TRINITY_DN54_c0_g2,TRINITY_DN2087_c2_g1	http://www.kegg.jp/kegg-bin/show_pathway?map=map01040&multi_query=K00507+%23FFFFFF,purple%0d%0aK10251+%23FFFFFF,green%0d%0aK10256+%23FFFFFF,green%0d%0aK00232+%23FFFFFF,red%0d%0a
ko00592	alpha-Linolenic acid metabolism	Metabolism	Lipid metabolism	3	0	3	10	0.278296	0.997837	TRINITY_DN4897_c0_g1,TRINITY_DN43_c1_g1,TRINITY_DN1267_c7_g1	-	http://www.kegg.jp/kegg-bin/show_pathway?map=map00592&multi_query=K00232+%23FFFFFF,red%0d%0aK14621+%23FFFFFF,red%0d%0a
ko00360	Phenylalanine metabolism	Metabolism	Amino acid metabolism	2	5	7	29	0.282609	0.997837	TRINITY_DN3354_c0_g1,TRINITY_DN2163_c0_g1	TRINITY_DN2002_c1_g1,TRINITY_DN14791_c0_g1,TRINITY_DN19_c0_g2,TRINITY_DN2877_c0_g1,TRINITY_DN5764_c0_g1	http://www.kegg.jp/kegg-bin/show_pathway?map=map00360&multi_query=K07253+%23FFFFFF,green%0d%0aK00838+%23FFFFFF,green%0d%0aK01426+%23FFFFFF,red%0d%0aK00276+%23FFFFFF,green%0d%0aK10775+%23FFFFFF,purple%0d%0a
ko00232	Caffeine metabolism	Metabolism	Biosynthesis of other secondary metabolites	1	0	1	2	0.336447	0.997837	TRINITY_DN7210_c0_g1	-	http://www.kegg.jp/kegg-bin/show_pathway?map=map00232&multi_query=K00365+%23FFFFFF,red%0d%0a
ko00660	C5-Branched dibasic acid metabolism	Metabolism	Carbohydrate metabolism	0	1	1	2	0.336447	0.997837	-	TRINITY_DN917_c2_g1	http://www.kegg.jp/kegg-bin/show_pathway?map=map00660&multi_query=K00052+%23FFFFFF,green%0d%0a
ko00270	Cysteine and methionine metabolism	Metabolism	Amino acid metabolism	1	9	10	46	0.342418	0.997837	TRINITY_DN4882_c0_g1	TRINITY_DN2418_c0_g3,TRINITY_DN2877_c0_g1,TRINITY_DN2494_c0_g1,TRINITY_DN2406_c1_g2,TRINITY_DN4256_c0_g1,TRINITY_DN1773_c0_g1,TRINITY_DN1626_c0_g1,TRINITY_DN93_c0_g1,TRINITY_DN501_c7_g1	http://www.kegg.jp/kegg-bin/show_pathway?map=map00270&multi_query=K17989+%23FFFFFF,green%0d%0aK00826+%23FFFFFF,green%0d%0aK00789+%23FFFFFF,green%0d%0aK01739+%23FFFFFF,green%0d%0aK17069+%23FFFFFF,green%0d%0aK00641+%23FFFFFF,red%0d%0aK00547+%23FFFFFF,green%0d%0aK00772+%23FFFFFF,green%0d%0aK00838+%23FFFFFF,green%0d%0aK00026+%23FFFFFF,green%0d%0a
ko00920	Sulfur metabolism	Metabolism	Energy metabolism	1	3	4	16	0.343316	0.997837	TRINITY_DN4882_c0_g1	TRINITY_DN2418_c0_g3,TRINITY_DN1563_c1_g1,TRINITY_DN2406_c1_g2	http://www.kegg.jp/kegg-bin/show_pathway?map=map00920&multi_query=K00390+%23FFFFFF,green%0d%0aK01739+%23FFFFFF,green%0d%0aK00641+%23FFFFFF,red%0d%0aK17069+%23FFFFFF,green%0d%0a
ko00565	Ether lipid metabolism	Metabolism	Lipid metabolism	2	2	4	16	0.343316	0.997837	TRINITY_DN4897_c0_g1,TRINITY_DN43_c1_g1	TRINITY_DN774_c1_g1,TRINITY_DN3413_c1_g1	http://www.kegg.jp/kegg-bin/show_pathway?map=map00565&multi_query=K01062+%23FFFFFF,green%0d%0aK00993+%23FFFFFF,green%0d%0aK14621+%23FFFFFF,red%0d%0a
ko00563	Glycosylphosphatidylinositol (GPI)-anchor biosynthesis	Metabolism	Glycan biosynthesis and metabolism	1	3	4	16	0.343316	0.997837	TRINITY_DN729_c2_g2	TRINITY_DN2085_c0_g1,TRINITY_DN2436_c1_g1,TRINITY_DN7988_c0_g1	http://www.kegg.jp/kegg-bin/show_pathway?map=map00563&multi_query=K03860+%23FFFFFF,red%0d%0aK05283+%23FFFFFF,green%0d%0aK05291+%23FFFFFF,green%0d%0aK09658+%23FFFFFF,green%0d%0a
ko00290	Valine, leucine and isoleucine biosynthesis	Metabolism	Amino acid metabolism	0	4	4	16	0.343316	0.997837	-	TRINITY_DN2641_c0_g1,TRINITY_DN1626_c0_g1,TRINITY_DN917_c2_g1,TRINITY_DN2494_c0_g1	http://www.kegg.jp/kegg-bin/show_pathway?map=map00290&multi_query=K17989+%23FFFFFF,green%0d%0aK00826+%23FFFFFF,green%0d%0aK01687+%23FFFFFF,green%0d%0aK00052+%23FFFFFF,green%0d%0a
ko00010	Glycolysis / Gluconeogenesis	Metabolism	Carbohydrate metabolism	2	7	9	42	0.373225	0.997837	TRINITY_DN248_c3_g1,TRINITY_DN1283_c0_g1	TRINITY_DN101_c5_g1,TRINITY_DN693_c2_g1,TRINITY_DN3281_c0_g1,TRINITY_DN155_c3_g1,TRINITY_DN1348_c0_g1,TRINITY_DN1579_c0_g1,TRINITY_DN498_c7_g1	http://www.kegg.jp/kegg-bin/show_pathway?map=map00010&multi_query=K01624+%23FFFFFF,green%0d%0aK03841+%23FFFFFF,green%0d%0aK00121+%23FFFFFF,red%0d%0aK14085+%23FFFFFF,red%0d%0aK01689+%23FFFFFF,green%0d%0aK01895+%23FFFFFF,green%0d%0aK00134+%23FFFFFF,green%0d%0aK00927+%23FFFFFF,green%0d%0aK01792+%23FFFFFF,green%0d%0a
ko00330	Arginine and proline metabolism	Metabolism	Amino acid metabolism	3	3	6	27	0.384178	0.997837	TRINITY_DN2163_c0_g1,TRINITY_DN876_c0_g1,TRINITY_DN248_c3_g1	TRINITY_DN1902_c0_g1,TRINITY_DN2155_c0_g1,TRINITY_DN544_c2_g2	http://www.kegg.jp/kegg-bin/show_pathway?map=map00330&multi_query=K01485+%23FFFFFF,green%0d%0aK01480+%23FFFFFF,green%0d%0aK00819+%23FFFFFF,red%0d%0aK14085+%23FFFFFF,red%0d%0aK01426+%23FFFFFF,red%0d%0a
ko00790	Folate biosynthesis	Metabolism	Metabolism of cofactors and vitamins	1	2	3	12	0.389494	0.997837	TRINITY_DN2975_c0_g1	TRINITY_DN2594_c0_g1,TRINITY_DN2527_c0_g1	http://www.kegg.jp/kegg-bin/show_pathway?map=map00790&multi_query=K03639+%23FFFFFF,red%0d%0aK00079+%23FFFFFF,green%0d%0aK01497+%23FFFFFF,green%0d%0a
ko00564	Glycerophospholipid metabolism	Metabolism	Lipid metabolism	7	4	11	54	0.417599	0.997837	TRINITY_DN6836_c0_g1,TRINITY_DN1428_c1_g1,TRINITY_DN43_c1_g1,TRINITY_DN4897_c0_g1,TRINITY_DN456_c0_g1,TRINITY_DN8904_c0_g1,TRINITY_DN284_c2_g1	TRINITY_DN1564_c0_g1,TRINITY_DN3413_c1_g1,TRINITY_DN3937_c0_g1,TRINITY_DN57_c3_g3	http://www.kegg.jp/kegg-bin/show_pathway?map=map00564&multi_query=K13535+%23FFFFFF,red%0d%0aK14676+%23FFFFFF,red%0d%0aK08744+%23FFFFFF,green%0d%0aK17103+%23FFFFFF,green%0d%0aK00993+%23FFFFFF,green%0d%0aK13509+%23FFFFFF,red%0d%0aK01094+%23FFFFFF,green%0d%0aK06130+%23FFFFFF,red%0d%0aK14621+%23FFFFFF,red%0d%0a
ko00620	Pyruvate metabolism	Metabolism	Carbohydrate metabolism	2	6	8	39	0.438665	0.997837	TRINITY_DN248_c3_g1,TRINITY_DN1283_c0_g1	TRINITY_DN173_c0_g1,TRINITY_DN1476_c0_g1,TRINITY_DN2342_c0_g1,TRINITY_DN93_c0_g1,TRINITY_DN2175_c0_g1,TRINITY_DN3281_c0_g1	http://www.kegg.jp/kegg-bin/show_pathway?map=map00620&multi_query=K01895+%23FFFFFF,green%0d%0aK00925+%23FFFFFF,green%0d%0aK00102+%23FFFFFF,green%0d%0aK01958+%23FFFFFF,green%0d%0aK01067+%23FFFFFF,green%0d%0aK00026+%23FFFFFF,green%0d%0aK14085+%23FFFFFF,red%0d%0aK00121+%23FFFFFF,red%0d%0a
ko00440	Phosphonate and phosphinate metabolism	Metabolism	Metabolism of other amino acids	0	1	1	3	0.459562	0.997837	-	TRINITY_DN3413_c1_g1	http://www.kegg.jp/kegg-bin/show_pathway?map=map00440&multi_query=K00993+%23FFFFFF,green%0d%0a
ko00260	Glycine, serine and threonine metabolism	Metabolism	Amino acid metabolism	3	6	9	45	0.459918	0.997837	TRINITY_DN248_c3_g1,TRINITY_DN1807_c0_g1,TRINITY_DN1256_c0_g1	TRINITY_DN2494_c0_g1,TRINITY_DN413_c1_g1,TRINITY_DN3018_c0_g1,TRINITY_DN57_c3_g3,TRINITY_DN6320_c0_g1,TRINITY_DN2002_c1_g1	http://www.kegg.jp/kegg-bin/show_pathway?map=map00260&multi_query=K14085+%23FFFFFF,red%0d%0aK00306+%23FFFFFF,green%0d%0aK17103+%23FFFFFF,green%0d%0aK00108+%23FFFFFF,red%0d%0aK15918+%23FFFFFF,green%0d%0aK17989+%23FFFFFF,green%0d%0aK01620+%23FFFFFF,green%0d%0aK00276+%23FFFFFF,green%0d%0a
ko00460	Cyanoamino acid metabolism	Metabolism	Metabolism of other amino acids	1	4	5	24	0.467089	0.997837	TRINITY_DN1884_c1_g1	TRINITY_DN1061_c3_g1,TRINITY_DN1797_c1_g1,TRINITY_DN13689_c0_g1,TRINITY_DN3156_c0_g1	http://www.kegg.jp/kegg-bin/show_pathway?map=map00460&multi_query=K10675+%23FFFFFF,red%0d%0aK00681+%23FFFFFF,green%0d%0aK18592+%23FFFFFF,green%0d%0aK05349+%23FFFFFF,green%0d%0a
ko04139	Mitophagy - yeast	Cellular Processes	Transport and catabolism	7	0	7	35	0.479773	0.997837	TRINITY_DN1157_c0_g1,TRINITY_DN5986_c0_g1,TRINITY_DN4669_c0_g1,TRINITY_DN3188_c0_g1,TRINITY_DN522_c1_g1,TRINITY_DN2524_c0_g1,TRINITY_DN593_c2_g1	-	http://www.kegg.jp/kegg-bin/show_pathway?map=map04139&multi_query=K11644+%23FFFFFF,red%0d%0aK11227+%23FFFFFF,red%0d%0aK17065+%23FFFFFF,red%0d%0aK02332+%23FFFFFF,red%0d%0aK08341+%23FFFFFF,red%0d%0aK11233+%23FFFFFF,red%0d%0a
ko04136	Autophagy - other	Cellular Processes	Transport and catabolism	4	2	6	30	0.491755	0.997837	TRINITY_DN1364_c0_g1,TRINITY_DN1157_c0_g1,TRINITY_DN226_c2_g2,TRINITY_DN5986_c0_g1	TRINITY_DN133_c5_g1,TRINITY_DN430_c1_g1	http://www.kegg.jp/kegg-bin/show_pathway?map=map04136&multi_query=K08331+%23FFFFFF,red%0d%0aK08341+%23FFFFFF,red%0d%0aK08334+%23FFFFFF,green%0d%0aK08339+%23FFFFFF,green%0d%0aK08342+%23FFFFFF,red%0d%0a
ko04144	Endocytosis	Cellular Processes	Transport and catabolism	14	4	18	96	0.521329	0.997837	TRINITY_DN9702_c0_g1,TRINITY_DN2738_c0_g1,TRINITY_DN284_c0_g2,TRINITY_DN875_c1_g1,TRINITY_DN6820_c0_g1,TRINITY_DN2258_c0_g1,TRINITY_DN7117_c0_g1,TRINITY_DN228_c1_g1,TRINITY_DN2880_c0_g1,TRINITY_DN2300_c3_g1,TRINITY_DN284_c0_g1,TRINITY_DN351_c1_g2,TRINITY_DN8199_c0_g1,TRINITY_DN216_c3_g2	TRINITY_DN3055_c0_g1,TRINITY_DN2740_c0_g1,TRINITY_DN4325_c0_g1,TRINITY_DN2491_c1_g1	http://www.kegg.jp/kegg-bin/show_pathway?map=map04144&multi_query=K05755+%23FFFFFF,green%0d%0aK11839+%23FFFFFF,red%0d%0aK10591+%23FFFFFF,red%0d%0aK04513+%23FFFFFF,red%0d%0aK07937+%23FFFFFF,green%0d%0aK12199+%23FFFFFF,red%0d%0aK07941+%23FFFFFF,red%0d%0aK03283+%23FFFFFF,red%0d%0aK18443+%23FFFFFF,green%0d%0aK12481+%23FFFFFF,green%0d%0a
ko00062	Fatty acid elongation	Metabolism	Lipid metabolism	0	3	3	15	0.545717	0.997837	-	TRINITY_DN10605_c0_g1,TRINITY_DN3272_c0_g2,TRINITY_DN3139_c0_g2	http://www.kegg.jp/kegg-bin/show_pathway?map=map00062&multi_query=K10251+%23FFFFFF,green%0d%0a
ko00515	Mannose type O-glycan biosynthesis	Metabolism	Glycan biosynthesis and metabolism	0	1	1	4	0.55988	0.997837	-	TRINITY_DN1969_c1_g1	http://www.kegg.jp/kegg-bin/show_pathway?map=map00515&multi_query=K00728+%23FFFFFF,green%0d%0a
ko00250	Alanine, aspartate and glutamate metabolism	Metabolism	Amino acid metabolism	4	2	6	32	0.559989	0.997837	TRINITY_DN861_c0_g2,TRINITY_DN2750_c1_g1,TRINITY_DN7377_c1_g1,TRINITY_DN2773_c0_g1	TRINITY_DN371_c7_g2,TRINITY_DN462_c0_g1	http://www.kegg.jp/kegg-bin/show_pathway?map=map00250&multi_query=K01755+%23FFFFFF,red%0d%0aK01955+%23FFFFFF,red%0d%0aK01580+%23FFFFFF,green%0d%0aK00820+%23FFFFFF,red%0d%0aK01956+%23FFFFFF,red%0d%0aK01915+%23FFFFFF,green%0d%0a
ko04111	Cell cycle - yeast	Cellular Processes	Cell growth and death	14	1	15	82	0.569559	0.997837	TRINITY_DN597_c4_g3,TRINITY_DN5901_c0_g1,TRINITY_DN2150_c0_g1,TRINITY_DN2508_c1_g1,TRINITY_DN3958_c0_g1,TRINITY_DN5901_c0_g2,TRINITY_DN2373_c1_g1,TRINITY_DN1380_c0_g1,TRINITY_DN1926_c0_g1,TRINITY_DN1145_c1_g1,TRINITY_DN5595_c0_g1,TRINITY_DN3529_c0_g1,TRINITY_DN31_c5_g2,TRINITY_DN31_c5_g1	TRINITY_DN5275_c0_g1	http://www.kegg.jp/kegg-bin/show_pathway?map=map04111&multi_query=K03094+%23FFFFFF,red%0d%0aK06662+%23FFFFFF,red%0d%0aK06671+%23FFFFFF,red%0d%0aK06672+%23FFFFFF,red%0d%0aK12412+%23FFFFFF,red%0d%0aK03352+%23FFFFFF,red%0d%0aK06636+%23FFFFFF,red%0d%0aK03364+%23FFFFFF,red%0d%0aK02216+%23FFFFFF,red%0d%0aK03347+%23FFFFFF,red%0d%0aK06639+%23FFFFFF,red%0d%0aK06653+%23FFFFFF,green%0d%0a
ko00230	Purine metabolism	Metabolism	Nucleotide metabolism	4	5	9	49	0.571435	0.997837	TRINITY_DN227_c0_g1,TRINITY_DN7210_c0_g1,TRINITY_DN1406_c0_g1,TRINITY_DN4506_c0_g1	TRINITY_DN157_c1_g2,TRINITY_DN3712_c1_g1,TRINITY_DN813_c2_g3,TRINITY_DN2682_c0_g1,TRINITY_DN3043_c0_g1	http://www.kegg.jp/kegg-bin/show_pathway?map=map00230&multi_query=K10808+%23FFFFFF,green%0d%0aK07127+%23FFFFFF,green%0d%0aK00940+%23FFFFFF,green%0d%0aK01488+%23FFFFFF,green%0d%0aK00365+%23FFFFFF,red%0d%0aK01477+%23FFFFFF,red%0d%0aK18532+%23FFFFFF,red%0d%0aK00088+%23FFFFFF,red%0d%0aK00856+%23FFFFFF,green%0d%0a
ko00053	Ascorbate and aldarate metabolism	Metabolism	Carbohydrate metabolism	1	1	2	10	0.57891	0.997837	TRINITY_DN248_c3_g1	TRINITY_DN2435_c0_g1	http://www.kegg.jp/kegg-bin/show_pathway?map=map00053&multi_query=K14085+%23FFFFFF,red%0d%0aK00469+%23FFFFFF,green%0d%0a
ko00630	Glyoxylate and dicarboxylate metabolism	Metabolism	Carbohydrate metabolism	2	6	8	44	0.586583	0.997837	TRINITY_DN12761_c0_g1,TRINITY_DN577_c1_g1	TRINITY_DN413_c1_g1,TRINITY_DN93_c0_g1,TRINITY_DN3053_c1_g1,TRINITY_DN3281_c0_g1,TRINITY_DN3309_c0_g1,TRINITY_DN371_c7_g2	http://www.kegg.jp/kegg-bin/show_pathway?map=map00630&multi_query=K03781+%23FFFFFF,purple%0d%0aK00026+%23FFFFFF,green%0d%0aK01637+%23FFFFFF,red%0d%0aK01915+%23FFFFFF,green%0d%0aK01647+%23FFFFFF,green%0d%0aK01895+%23FFFFFF,green%0d%0aK15918+%23FFFFFF,green%0d%0a
ko00650	Butanoate metabolism	Metabolism	Carbohydrate metabolism	1	2	3	16	0.592424	0.997837	TRINITY_DN228_c5_g1	TRINITY_DN462_c0_g1,TRINITY_DN14625_c0_g1	http://www.kegg.jp/kegg-bin/show_pathway?map=map00650&multi_query=K01907+%23FFFFFF,green%0d%0aK01641+%23FFFFFF,red%0d%0aK01580+%23FFFFFF,green%0d%0a
ko00300	Lysine biosynthesis	Metabolism	Amino acid metabolism	1	2	3	16	0.592424	0.997837	TRINITY_DN2043_c0_g1	TRINITY_DN2877_c0_g1,TRINITY_DN47_c1_g1	http://www.kegg.jp/kegg-bin/show_pathway?map=map00300&multi_query=K00838+%23FFFFFF,green%0d%0aK05824+%23FFFFFF,green%0d%0aK17450+%23FFFFFF,red%0d%0a
ko00350	Tyrosine metabolism	Metabolism	Amino acid metabolism	1	6	7	39	0.603763	0.997837	TRINITY_DN1283_c0_g1	TRINITY_DN2668_c2_g1,TRINITY_DN14791_c0_g1,TRINITY_DN5764_c0_g1,TRINITY_DN1188_c0_g1,TRINITY_DN2877_c0_g1,TRINITY_DN2002_c1_g1	http://www.kegg.jp/kegg-bin/show_pathway?map=map00350&multi_query=K00505+%23FFFFFF,green%0d%0aK07253+%23FFFFFF,green%0d%0aK00838+%23FFFFFF,green%0d%0aK02510+%23FFFFFF,green%0d%0aK00276+%23FFFFFF,green%0d%0aK00121+%23FFFFFF,red%0d%0a
ko00020	Citrate cycle (TCA cycle)	Metabolism	Carbohydrate metabolism	1	4	5	28	0.614242	0.997837	TRINITY_DN14918_c0_g1	TRINITY_DN2175_c0_g1,TRINITY_DN202_c3_g1,TRINITY_DN93_c0_g1,TRINITY_DN3309_c0_g1	http://www.kegg.jp/kegg-bin/show_pathway?map=map00020&multi_query=K01958+%23FFFFFF,green%0d%0aK01647+%23FFFFFF,green%0d%0aK00026+%23FFFFFF,green%0d%0aK00235+%23FFFFFF,red%0d%0aK00234+%23FFFFFF,green%0d%0a
ko00910	Nitrogen metabolism	Metabolism	Energy metabolism	1	1	2	11	0.633335	0.997837	TRINITY_DN8_c1_g1	TRINITY_DN371_c7_g2	http://www.kegg.jp/kegg-bin/show_pathway?map=map00910&multi_query=K01915+%23FFFFFF,green%0d%0aK02575+%23FFFFFF,red%0d%0a
ko04122	Sulfur relay system	Genetic Information Processing	Folding, sorting and degradation	1	1	2	11	0.633335	0.997837	TRINITY_DN2975_c0_g1	TRINITY_DN2348_c0_g1	http://www.kegg.jp/kegg-bin/show_pathway?map=map04122&multi_query=K14171+%23FFFFFF,green%0d%0aK03639+%23FFFFFF,red%0d%0a
ko04070	Phosphatidylinositol signaling system	Environmental Information Processing	Signal transduction	2	2	4	24	0.67592	0.997837	TRINITY_DN217_c18_g1,TRINITY_DN1404_c1_g1	TRINITY_DN2165_c0_g2,TRINITY_DN2930_c0_g1	http://www.kegg.jp/kegg-bin/show_pathway?map=map04070&multi_query=K01092+%23FFFFFF,green%0d%0aK01099+%23FFFFFF,green%0d%0aK20279+%23FFFFFF,red%0d%0aK05857+%23FFFFFF,red%0d%0a
ko03022	Basal transcription factors	Genetic Information Processing	Transcription	5	0	5	30	0.678211	0.997837	TRINITY_DN608_c0_g1,TRINITY_DN930_c7_g3,TRINITY_DN1038_c0_g1,TRINITY_DN1755_c1_g1,TRINITY_DN957_c4_g1	-	http://www.kegg.jp/kegg-bin/show_pathway?map=map03022&multi_query=K03130+%23FFFFFF,red%0d%0aK03138+%23FFFFFF,red%0d%0aK10842+%23FFFFFF,red%0d%0aK03128+%23FFFFFF,red%0d%0aK03136+%23FFFFFF,red%0d%0a
ko03030	DNA replication	Genetic Information Processing	Replication and repair	5	2	7	42	0.685693	0.997837	TRINITY_DN1197_c0_g1,TRINITY_DN1538_c0_g1,TRINITY_DN1087_c0_g1,TRINITY_DN1608_c0_g1,TRINITY_DN2576_c1_g1	TRINITY_DN405_c1_g1,TRINITY_DN5518_c0_g1	http://www.kegg.jp/kegg-bin/show_pathway?map=map03030&multi_query=K10756+%23FFFFFF,red%0d%0aK10744+%23FFFFFF,green%0d%0aK02324+%23FFFFFF,red%0d%0aK03469+%23FFFFFF,purple%0d%0aK02325+%23FFFFFF,red%0d%0a
ko00280	Valine, leucine and isoleucine degradation	Metabolism	Amino acid metabolism	2	3	5	31	0.707412	0.997837	TRINITY_DN228_c5_g1,TRINITY_DN248_c3_g1	TRINITY_DN13136_c0_g1,TRINITY_DN1626_c0_g1,TRINITY_DN14625_c0_g1	http://www.kegg.jp/kegg-bin/show_pathway?map=map00280&multi_query=K14085+%23FFFFFF,red%0d%0aK00166+%23FFFFFF,green%0d%0aK01641+%23FFFFFF,red%0d%0aK00826+%23FFFFFF,green%0d%0aK01907+%23FFFFFF,green%0d%0a
ko00604	Glycosphingolipid biosynthesis - ganglio series	Metabolism	Glycan biosynthesis and metabolism	0	1	1	6	0.708199	0.997837	-	TRINITY_DN6129_c0_g2	http://www.kegg.jp/kegg-bin/show_pathway?map=map00604&multi_query=K12373+%23FFFFFF,green%0d%0a
ko00860	Porphyrin metabolism	Metabolism	Metabolism of cofactors and vitamins	1	1	2	13	0.725437	0.997837	TRINITY_DN4949_c0_g1	TRINITY_DN3203_c0_g1	http://www.kegg.jp/kegg-bin/show_pathway?map=map00860&multi_query=K02259+%23FFFFFF,green%0d%0aK01772+%23FFFFFF,red%0d%0a
ko00640	Propanoate metabolism	Metabolism	Carbohydrate metabolism	2	3	5	32	0.734712	0.997837	TRINITY_DN1267_c7_g1,TRINITY_DN215_c1_g1	TRINITY_DN13136_c0_g1,TRINITY_DN3281_c0_g1,TRINITY_DN173_c0_g1	http://www.kegg.jp/kegg-bin/show_pathway?map=map00640&multi_query=K00232+%23FFFFFF,red%0d%0aK00925+%23FFFFFF,green%0d%0aK00166+%23FFFFFF,green%0d%0aK01895+%23FFFFFF,green%0d%0aK14729+%23FFFFFF,red%0d%0a
ko00410	beta-Alanine metabolism	Metabolism	Metabolism of other amino acids	3	2	5	32	0.734712	0.997837	TRINITY_DN1267_c7_g1,TRINITY_DN248_c3_g1,TRINITY_DN215_c1_g1	TRINITY_DN2002_c1_g1,TRINITY_DN462_c0_g1	http://www.kegg.jp/kegg-bin/show_pathway?map=map00410&multi_query=K14085+%23FFFFFF,red%0d%0aK00232+%23FFFFFF,red%0d%0aK01580+%23FFFFFF,green%0d%0aK14729+%23FFFFFF,red%0d%0aK00276+%23FFFFFF,green%0d%0a
ko03440	Homologous recombination	Genetic Information Processing	Replication and repair	3	1	4	26	0.738294	0.997837	TRINITY_DN340_c0_g1,TRINITY_DN3762_c0_g1,TRINITY_DN1672_c1_g1	TRINITY_DN313_c5_g1	http://www.kegg.jp/kegg-bin/show_pathway?map=map03440&multi_query=K10958+%23FFFFFF,green%0d%0aK08775+%23FFFFFF,red%0d%0aK10866+%23FFFFFF,red%0d%0aK10882+%23FFFFFF,red%0d%0a
ko04130	SNARE interactions in vesicular transport	Genetic Information Processing	Folding, sorting and degradation	2	1	3	20	0.746321	0.997837	TRINITY_DN528_c0_g2,TRINITY_DN7377_c0_g1	TRINITY_DN1075_c1_g1	http://www.kegg.jp/kegg-bin/show_pathway?map=map04130&multi_query=K08502+%23FFFFFF,green%0d%0aK08486+%23FFFFFF,red%0d%0a
ko04145	Phagosome	Cellular Processes	Transport and catabolism	2	6	8	51	0.755962	0.997837	TRINITY_DN459_c0_g1,TRINITY_DN324_c3_g2	TRINITY_DN245_c0_g2,TRINITY_DN3461_c1_g1,TRINITY_DN93_c1_g1,TRINITY_DN4263_c1_g2,TRINITY_DN3477_c1_g1,TRINITY_DN347_c1_g1	http://www.kegg.jp/kegg-bin/show_pathway?map=map04145&multi_query=K07375+%23FFFFFF,red%0d%0aK07374+%23FFFFFF,red%0d%0aK09481+%23FFFFFF,green%0d%0aK05692+%23FFFFFF,green%0d%0aK02149+%23FFFFFF,green%0d%0aK08054+%23FFFFFF,green%0d%0aK10956+%23FFFFFF,green%0d%0a
ko00380	Tryptophan metabolism	Metabolism	Amino acid metabolism	4	3	7	45	0.755991	0.997837	TRINITY_DN577_c1_g1,TRINITY_DN532_c0_g1,TRINITY_DN2163_c0_g1,TRINITY_DN248_c3_g1	TRINITY_DN2877_c0_g1,TRINITY_DN363_c0_g2,TRINITY_DN3053_c1_g1	http://www.kegg.jp/kegg-bin/show_pathway?map=map00380&multi_query=K00463+%23FFFFFF,red%0d%0aK00838+%23FFFFFF,green%0d%0aK14338+%23FFFFFF,green%0d%0aK14085+%23FFFFFF,red%0d%0aK03781+%23FFFFFF,purple%0d%0aK01426+%23FFFFFF,red%0d%0a
ko00310	Lysine degradation	Metabolism	Amino acid metabolism	3	2	5	33	0.760116	0.997837	TRINITY_DN628_c0_g1,TRINITY_DN248_c3_g1,TRINITY_DN2747_c0_g1	TRINITY_DN3018_c0_g1,TRINITY_DN707_c1_g1	http://www.kegg.jp/kegg-bin/show_pathway?map=map00310&multi_query=K00306+%23FFFFFF,green%0d%0aK14157+%23FFFFFF,red%0d%0aK14085+%23FFFFFF,red%0d%0aK11423+%23FFFFFF,red%0d%0aK11426+%23FFFFFF,green%0d%0a
ko00603	Glycosphingolipid biosynthesis - globo and isoglobo series	Metabolism	Glycan biosynthesis and metabolism	0	1	1	7	0.762438	0.997837	-	TRINITY_DN6129_c0_g2	http://www.kegg.jp/kegg-bin/show_pathway?map=map00603&multi_query=K12373+%23FFFFFF,green%0d%0a
ko00770	Pantothenate and CoA biosynthesis	Metabolism	Metabolism of cofactors and vitamins	1	2	3	21	0.776614	0.997837	TRINITY_DN480_c0_g1	TRINITY_DN1626_c0_g1,TRINITY_DN2641_c0_g1	http://www.kegg.jp/kegg-bin/show_pathway?map=map00770&multi_query=K01922+%23FFFFFF,red%0d%0aK01687+%23FFFFFF,green%0d%0aK00826+%23FFFFFF,green%0d%0a
ko00760	Nicotinate and nicotinamide metabolism	Metabolism	Metabolism of cofactors and vitamins	1	3	4	28	0.791162	0.997837	TRINITY_DN415_c1_g2	TRINITY_DN1809_c0_g1,TRINITY_DN5102_c0_g1,TRINITY_DN6459_c0_g1	http://www.kegg.jp/kegg-bin/show_pathway?map=map00760&multi_query=K11121+%23FFFFFF,red%0d%0aK10524+%23FFFFFF,green%0d%0aK11415+%23FFFFFF,green%0d%0aK03426+%23FFFFFF,green%0d%0a
ko03010	Ribosome	Genetic Information Processing	Translation	1	13	14	89	0.795781	0.997837	TRINITY_DN2024_c0_g1	TRINITY_DN211_c3_g1,TRINITY_DN1006_c8_g1,TRINITY_DN5176_c0_g1,TRINITY_DN5125_c0_g1,TRINITY_DN7913_c0_g1,TRINITY_DN6788_c0_g1,TRINITY_DN2236_c0_g1,TRINITY_DN7914_c0_g1,TRINITY_DN1134_c0_g1,TRINITY_DN3101_c0_g1,TRINITY_DN1565_c3_g1,TRINITY_DN6852_c0_g1,TRINITY_DN973_c5_g1	http://www.kegg.jp/kegg-bin/show_pathway?map=map03010&multi_query=K02969+%23FFFFFF,green%0d%0aK02966+%23FFFFFF,green%0d%0aK02951+%23FFFFFF,green%0d%0aK02938+%23FFFFFF,green%0d%0aK02891+%23FFFFFF,green%0d%0aK02923+%23FFFFFF,green%0d%0aK02913+%23FFFFFF,green%0d%0aK02888+%23FFFFFF,green%0d%0aK02900+%23FFFFFF,green%0d%0aK02954+%23FFFFFF,green%0d%0aK02942+%23FFFFFF,red%0d%0aK02943+%23FFFFFF,green%0d%0…
ko00220	Arginine biosynthesis	Metabolism	Amino acid metabolism	1	1	2	15	0.797203	0.997837	TRINITY_DN7377_c1_g1	TRINITY_DN371_c7_g2	http://www.kegg.jp/kegg-bin/show_pathway?map=map00220&multi_query=K01755+%23FFFFFF,red%0d%0aK01915+%23FFFFFF,green%0d%0a
ko00740	Riboflavin metabolism	Metabolism	Metabolism of cofactors and vitamins	0	1	1	8	0.806616	0.997837	-	TRINITY_DN2527_c0_g1	http://www.kegg.jp/kegg-bin/show_pathway?map=map00740&multi_query=K01497+%23FFFFFF,green%0d%0a
ko00531	Glycosaminoglycan degradation	Metabolism	Glycan biosynthesis and metabolism	0	1	1	8	0.806616	0.997837	-	TRINITY_DN6129_c0_g2	http://www.kegg.jp/kegg-bin/show_pathway?map=map00531&multi_query=K12373+%23FFFFFF,green%0d%0a
ko00052	Galactose metabolism	Metabolism	Carbohydrate metabolism	2	2	4	29	0.814207	0.997837	TRINITY_DN7343_c0_g1,TRINITY_DN5977_c0_g1	TRINITY_DN188_c0_g2,TRINITY_DN4112_c0_g1	http://www.kegg.jp/kegg-bin/show_pathway?map=map00052&multi_query=K00963+%23FFFFFF,purple%0d%0aK01187+%23FFFFFF,green%0d%0a
ko00785	Lipoic acid metabolism	Metabolism	Metabolism of cofactors and vitamins	0	1	1	9	0.842594	0.997837	-	TRINITY_DN6310_c0_g1	http://www.kegg.jp/kegg-bin/show_pathway?map=map00785&multi_query=K03800+%23FFFFFF,green%0d%0a
ko02010	ABC transporters	Environmental Information Processing	Membrane transport	1	0	1	9	0.842594	0.997837	TRINITY_DN318_c0_g1	-	http://www.kegg.jp/kegg-bin/show_pathway?map=map02010&multi_query=K05658+%23FFFFFF,red%0d%0a
ko00400	Phenylalanine, tyrosine and tryptophan biosynthesis	Metabolism	Amino acid metabolism	1	2	3	24	0.850057	0.997837	TRINITY_DN2433_c0_g1	TRINITY_DN2877_c0_g1,TRINITY_DN5524_c0_g1	http://www.kegg.jp/kegg-bin/show_pathway?map=map00400&multi_query=K01626+%23FFFFFF,green%0d%0aK00838+%23FFFFFF,green%0d%0aK00766+%23FFFFFF,red%0d%0a
ko00340	Histidine metabolism	Metabolism	Amino acid metabolism	2	0	2	17	0.851863	0.997837	TRINITY_DN77_c0_g1,TRINITY_DN248_c3_g1	-	http://www.kegg.jp/kegg-bin/show_pathway?map=map00340&multi_query=K20246+%23FFFFFF,red%0d%0aK14085+%23FFFFFF,red%0d%0a
ko00450	Selenocompound metabolism	Metabolism	Metabolism of other amino acids	0	1	1	10	0.871892	0.997837	-	TRINITY_DN2406_c1_g2	http://www.kegg.jp/kegg-bin/show_pathway?map=map00450&multi_query=K01739+%23FFFFFF,green%0d%0a
ko00670	One carbon pool by folate	Metabolism	Metabolism of cofactors and vitamins	0	1	1	10	0.871892	0.997837	-	TRINITY_DN4141_c0_g1	http://www.kegg.jp/kegg-bin/show_pathway?map=map00670&multi_query=K01934+%23FFFFFF,green%0d%0a
ko00071	Fatty acid degradation	Metabolism	Lipid metabolism	3	1	4	33	0.886407	0.997837	TRINITY_DN1267_c7_g1,TRINITY_DN1283_c0_g1,TRINITY_DN248_c3_g1	TRINITY_DN363_c0_g2	http://www.kegg.jp/kegg-bin/show_pathway?map=map00071&multi_query=K00232+%23FFFFFF,red%0d%0aK00121+%23FFFFFF,red%0d%0aK14338+%23FFFFFF,green%0d%0aK14085+%23FFFFFF,red%0d%0a
ko03430	Mismatch repair	Genetic Information Processing	Replication and repair	3	0	3	27	0.901558	0.997837	TRINITY_DN200_c1_g1,TRINITY_DN1087_c0_g1,TRINITY_DN278_c4_g1	-	http://www.kegg.jp/kegg-bin/show_pathway?map=map03430&multi_query=K08736+%23FFFFFF,red%0d%0aK10756+%23FFFFFF,red%0d%0aK08734+%23FFFFFF,red%0d%0a
ko03450	Non-homologous end-joining	Genetic Information Processing	Replication and repair	1	0	1	13	0.930981	0.997837	TRINITY_DN1672_c1_g1	-	http://www.kegg.jp/kegg-bin/show_pathway?map=map03450&multi_query=K10866+%23FFFFFF,red%0d%0a
ko00100	Steroid biosynthesis	Metabolism	Lipid metabolism	1	1	2	22	0.934906	0.997837	TRINITY_DN2042_c3_g1	TRINITY_DN3254_c1_g2	http://www.kegg.jp/kegg-bin/show_pathway?map=map00100&multi_query=K07750+%23FFFFFF,green%0d%0aK00223+%23FFFFFF,red%0d%0a
ko00061	Fatty acid biosynthesis	Metabolism	Lipid metabolism	0	1	1	14	0.943851	0.997837	-	TRINITY_DN9154_c0_g1	http://www.kegg.jp/kegg-bin/show_pathway?map=map00061&multi_query=K00059+%23FFFFFF,green%0d%0a
ko00600	Sphingolipid metabolism	Metabolism	Lipid metabolism	0	1	1	14	0.943851	0.997837	-	TRINITY_DN4153_c1_g1	http://www.kegg.jp/kegg-bin/show_pathway?map=map00600&multi_query=K04713+%23FFFFFF,green%0d%0a
ko04146	Peroxisome	Cellular Processes	Transport and catabolism	3	5	8	67	0.948525	0.997837	TRINITY_DN1267_c7_g1,TRINITY_DN2825_c0_g2,TRINITY_DN577_c1_g1	TRINITY_DN4263_c1_g1,TRINITY_DN3053_c1_g1,TRINITY_DN3018_c0_g1,TRINITY_DN880_c0_g1,TRINITY_DN6459_c0_g1	http://www.kegg.jp/kegg-bin/show_pathway?map=map04146&multi_query=K00232+%23FFFFFF,red%0d%0aK03426+%23FFFFFF,green%0d%0aK00624+%23FFFFFF,red%0d%0aK13237+%23FFFFFF,green%0d%0aK04565+%23FFFFFF,green%0d%0aK00306+%23FFFFFF,green%0d%0aK03781+%23FFFFFF,purple%0d%0a
ko00511	Other glycan degradation	Metabolism	Glycan biosynthesis and metabolism	0	1	1	15	0.954326	0.997837	-	TRINITY_DN6129_c0_g2	http://www.kegg.jp/kegg-bin/show_pathway?map=map00511&multi_query=K12373+%23FFFFFF,green%0d%0a
ko03420	Nucleotide excision repair	Genetic Information Processing	Replication and repair	4	0	4	40	0.955592	0.997837	TRINITY_DN1087_c0_g1,TRINITY_DN1608_c0_g1,TRINITY_DN930_c7_g3,TRINITY_DN2576_c1_g1	-	http://www.kegg.jp/kegg-bin/show_pathway?map=map03420&multi_query=K02325+%23FFFFFF,red%0d%0aK10842+%23FFFFFF,red%0d%0aK10756+%23FFFFFF,red%0d%0aK02324+%23FFFFFF,red%0d%0a
ko04138	Autophagy - yeast	Cellular Processes	Transport and catabolism	5	5	10	82	0.956612	0.997837	TRINITY_DN1157_c0_g1,TRINITY_DN907_c2_g1,TRINITY_DN5986_c0_g1,TRINITY_DN226_c2_g2,TRINITY_DN1364_c0_g1	TRINITY_DN2740_c0_g1,TRINITY_DN1075_c1_g1,TRINITY_DN430_c1_g1,TRINITY_DN133_c5_g1,TRINITY_DN832_c0_g1	http://www.kegg.jp/kegg-bin/show_pathway?map=map04138&multi_query=K08334+%23FFFFFF,green%0d%0aK08341+%23FFFFFF,red%0d%0aK17607+%23FFFFFF,red%0d%0aK08339+%23FFFFFF,green%0d%0aK08331+%23FFFFFF,red%0d%0aK05755+%23FFFFFF,green%0d%0aK01336+%23FFFFFF,green%0d%0aK08342+%23FFFFFF,red%0d%0aK08502+%23FFFFFF,green%0d%0a
ko03410	Base excision repair	Genetic Information Processing	Replication and repair	2	0	2	25	0.961028	0.997837	TRINITY_DN2576_c1_g1,TRINITY_DN1608_c0_g1	-	http://www.kegg.jp/kegg-bin/show_pathway?map=map03410&multi_query=K02325+%23FFFFFF,red%0d%0aK02324+%23FFFFFF,red%0d%0a
ko03008	Ribosome biogenesis in eukaryotes	Genetic Information Processing	Translation	6	2	8	70	0.963221	0.997837	TRINITY_DN2267_c0_g1,TRINITY_DN1840_c0_g1,TRINITY_DN11688_c0_g1,TRINITY_DN4506_c0_g1,TRINITY_DN4165_c0_g1,TRINITY_DN316_c0_g2	TRINITY_DN5932_c0_g1,TRINITY_DN3165_c1_g1	http://www.kegg.jp/kegg-bin/show_pathway?map=map03008&multi_query=K14563+%23FFFFFF,red%0d%0aK13288+%23FFFFFF,green%0d%0aK14758+%23FFFFFF,purple%0d%0aK14539+%23FFFFFF,red%0d%0aK18532+%23FFFFFF,red%0d%0aK14558+%23FFFFFF,red%0d%0a
ko04113	Meiosis - yeast	Cellular Processes	Cell growth and death	8	0	8	73	0.97403	0.997837	TRINITY_DN1380_c0_g1,TRINITY_DN1926_c0_g1,TRINITY_DN1611_c0_g1,TRINITY_DN31_c5_g2,TRINITY_DN31_c5_g1,TRINITY_DN2508_c1_g1,TRINITY_DN3958_c0_g1,TRINITY_DN2373_c1_g1	-	http://www.kegg.jp/kegg-bin/show_pathway?map=map04113&multi_query=K10878+%23FFFFFF,red%0d%0aK06662+%23FFFFFF,red%0d%0aK02216+%23FFFFFF,red%0d%0aK06671+%23FFFFFF,red%0d%0aK06636+%23FFFFFF,red%0d%0aK06639+%23FFFFFF,red%0d%0aK03352+%23FFFFFF,red%0d%0a
ko03050	Proteasome	Genetic Information Processing	Folding, sorting and degradation	3	1	4	44	0.974957	0.997837	TRINITY_DN1882_c1_g1,TRINITY_DN538_c0_g1,TRINITY_DN100_c2_g1	TRINITY_DN40_c3_g1	http://www.kegg.jp/kegg-bin/show_pathway?map=map03050&multi_query=K03064+%23FFFFFF,red%0d%0aK02732+%23FFFFFF,green%0d%0aK03032+%23FFFFFF,red%0d%0aK06699+%23FFFFFF,red%0d%0a
ko00970	Aminoacyl-tRNA biosynthesis	Genetic Information Processing	Translation	3	0	3	37	0.978508	0.997837	TRINITY_DN1067_c0_g1,TRINITY_DN852_c1_g1,TRINITY_DN943_c1_g1	-	http://www.kegg.jp/kegg-bin/show_pathway?map=map00970&multi_query=K01872+%23FFFFFF,red%0d%0aK01886+%23FFFFFF,red%0d%0aK01876+%23FFFFFF,red%0d%0a
ko03013	Nucleocytoplasmic transport	Genetic Information Processing	Translation	8	0	8	75	0.979535	0.997837	TRINITY_DN1308_c1_g1,TRINITY_DN1319_c5_g2,TRINITY_DN3638_c0_g1,TRINITY_DN2752_c0_g1,TRINITY_DN1337_c0_g1,TRINITY_DN2146_c0_g1,TRINITY_DN1448_c0_g1,TRINITY_DN2443_c1_g1	-	http://www.kegg.jp/kegg-bin/show_pathway?map=map03013&multi_query=K14310+%23FFFFFF,red%0d%0aK14311+%23FFFFFF,red%0d%0aK14297+%23FFFFFF,red%0d%0aK18723+%23FFFFFF,red%0d%0aK14303+%23FFFFFF,red%0d%0aK14308+%23FFFFFF,red%0d%0aK14326+%23FFFFFF,red%0d%0aK14298+%23FFFFFF,red%0d%0a
ko03040	Spliceosome	Genetic Information Processing	Transcription	9	0	9	83	0.981727	0.997837	TRINITY_DN351_c1_g2,TRINITY_DN536_c6_g1,TRINITY_DN2300_c3_g1,TRINITY_DN141_c2_g1,TRINITY_DN216_c3_g2,TRINITY_DN9702_c0_g1,TRINITY_DN5825_c5_g1,TRINITY_DN7117_c0_g1,TRINITY_DN383_c0_g1	-	http://www.kegg.jp/kegg-bin/show_pathway?map=map03040&multi_query=K03283+%23FFFFFF,red%0d%0aK12864+%23FFFFFF,red%0d%0aK12820+%23FFFFFF,red%0d%0aK11984+%23FFFFFF,red%0d%0aK12818+%23FFFFFF,red%0d%0a
ko00500	Starch and sucrose metabolism	Metabolism	Carbohydrate metabolism	3	5	8	83	0.992459	0.997837	TRINITY_DN5977_c0_g1,TRINITY_DN2486_c0_g1,TRINITY_DN7343_c0_g1	TRINITY_DN188_c0_g2,TRINITY_DN1797_c1_g1,TRINITY_DN4112_c0_g1,TRINITY_DN2563_c0_g1,TRINITY_DN13689_c0_g1	http://www.kegg.jp/kegg-bin/show_pathway?map=map00500&multi_query=K01178+%23FFFFFF,red%0d%0aK01187+%23FFFFFF,green%0d%0aK00963+%23FFFFFF,purple%0d%0aK05349+%23FFFFFF,green%0d%0aK01194+%23FFFFFF,green%0d%0a
ko03015	mRNA surveillance pathway	Genetic Information Processing	Translation	4	0	4	52	0.992517	0.997837	TRINITY_DN1162_c2_g1,TRINITY_DN1308_c1_g1,TRINITY_DN3638_c0_g1,TRINITY_DN2300_c2_g1	-	http://www.kegg.jp/kegg-bin/show_pathway?map=map03015&multi_query=K14397+%23FFFFFF,red%0d%0aK14401+%23FFFFFF,red%0d%0aK14326+%23FFFFFF,red%0d%0aK18723+%23FFFFFF,red%0d%0a
ko03018	RNA degradation	Genetic Information Processing	Folding, sorting and degradation	1	2	3	48	0.996519	0.997837	TRINITY_DN5495_c0_g1	TRINITY_DN1348_c0_g1,TRINITY_DN111_c8_g1	http://www.kegg.jp/kegg-bin/show_pathway?map=map03018&multi_query=K12592+%23FFFFFF,red%0d%0aK12620+%23FFFFFF,green%0d%0aK01689+%23FFFFFF,green%0d%0a
ko03020	RNA polymerase	Genetic Information Processing	Transcription	1	1	2	41	0.997837	0.997837	TRINITY_DN1748_c1_g1	TRINITY_DN10198_c0_g1	http://www.kegg.jp/kegg-bin/show_pathway?map=map03020&multi_query=K03025+%23FFFFFF,red%0d%0aK03000+%23FFFFFF,green%0d%0a

[truncated: 2 more sheets: S6 D3-vs-D6KEGG-enrichment, S7 D3vsD6 common-pathway]
